# Supplementary material for: A model-based factorization method for scRNA data unveils bifurcating transcriptional modules underlying cell fate determination
Source: eLife. 2025 Feb 5;13:RP97424. doi: 10.7554/eLife.97424 (PMC11798574; doi:10.7554/eLife.97424)
Supplement: Supplementary file 1. [file elife-97424-supp1.xlsx]

## Sheet: supplementary_table_1
Supplementary file 1: The specific configuration of parameters contained in the model.
