# Supplementary material for: A model-based factorization method for scRNA data unveils bifurcating transcriptional modules underlying cell fate determination
Source: eLife. 2025 Feb 5;13:RP97424. doi: 10.7554/eLife.97424 (PMC11798574; doi:10.7554/eLife.97424)
Supplement: Supplementary file 2. [file elife-97424-supp2.xlsx]

## Sheet: overall
Supplementary file 2: P-values associated with one-sided paired t-tests assessing whether the overall performance score of MGPfact significantly higher than the other methods on the different trajectory types in test set.
Dataset Trajectory Type	DPT	Monocle DDRTree	Monocle 3	scFates Tree	scShaper	TInGa	TSCAN
Acyclic Graph	0.00322159	0.973952	0.65165	0.168208	0.00519959	0.860857	0.00227935
Bifurcation	0.0121481	0.07419	0.165746	0.223626	0.0454607	0.941919	1.11867e-05
Convergence	0.275524	0.235059	0.00149236	0.0705247	0.0492357	0.940338	0.00181163
Cycle	0.000274242	0.195366	0.462697	0.0922368	0.983955	0.999797	0.860833
Disconnected Graph	0.000123093	0.0486891	0.914787	0.126224	0.000714399	0.938954	0.00015788
Connected Graph	0.000765177	0.999508	0.987781	0.224115	0.00227769	0.924256	1.14242e-05
Linear	1.39315e-12	1.25994e-12	0.000930838	3.27839e-05	0.999998	0.0129246	0.0591768
Multifurcation	0.0026129	0.0123205	0.119735	0.559307	0.0396778	0.24615	0.00100551
Tree	4.44539e-05	0.999999	0.999965	0.0685643	3.44947e-07	0.999873	6.89234e-14

## Sheet: HIM
Supplementary Table 2: P-values associated with one-sided paired t-tests assessing whether the HIM performance score of MGPfact significantly higher than the other methods on the different trajectory types in test set.
Dataset Trajectory Type	DPT	Monocle DDRTree	Monocle 3	scFates.Tree	scShaper	TInGa	TSCAN
Acyclic Graph	0.785596	0.999954	0.857445	0.326039	0.000912329	0.79612	0.000913779
Bifurcation	0.919771	0.211256	0.0762202	0.618025	0.00365675	0.605345	0.00365675
Convergence	0.673761	0.149863	0.000286295	0.592216	0.00684418	0.711388	0.00684418
Cycle	0.182322	0.999996	0.845766	0.786775	0.0830514	0.999807	0.0830514
Disconnected Graph	0.0131217	0.858139	0.918832	0.991042	0.00878031	0.938436	0.00878031
Connected Graph	0.969191	1	0.995034	0.976419	0.000217539	0.792299	0.000216632
Linear	2.19698e-18	3.91563e-18	1.16906e-08	9.38132e-05	0.997876	1.08711e-10	0.997886
Multifurcation	0.732991	0.895384	0.956743	0.728347	0.0194624	0.0109418	0.0194624
Tree	0.999996	1	1	0.999916	1.49382e-11	1	1.49382e-11

## Sheet: wcor_features
Supplementary Table 2: P-values associated with one-sided paired t-tests assessing whether the wcor-features performance score of MGPfact significantly higher than the other methods on the different trajectory types in test set.
Dataset Trajectory Type	DPT	Monocle DDRTree	Monocle 3	scFates.Tree	scShaper	TInGa	TSCAN
Acyclic Graph	0.00148164	0.892265	0.573004	0.218752	0.0239669	0.887212	0.0677531
Bifurcation	1.20449e-05	0.0725361	0.350265	0.0766017	0.00205829	0.773069	0.000540487
Convergence	0.0949968	0.246107	0.47731	0.122731	0.0493026	0.783751	0.209338
Cycle	0.00110556	0.951885	0.782177	0.731913	0.767287	0.706425	0.322065
Disconnected Graph	0.0080194	0.257306	0.993038	0.0907911	0.00101363	0.917237	0.0675282
Connected Graph	6.70671e-07	0.964597	0.892954	0.000559095	0.0103534	0.785021	0.0100305
Linear	5.23903e-05	0.352214	0.963757	0.14409	0.998172	0.957973	0.169873
Multifurcation	0.00267153	0.0461162	0.379197	0.0841368	0.0156209	0.0858515	0.026982
Tree	5.8493e-06	0.868289	0.9996	0.106207	0.000200224	0.99535	0.0107209

## Sheet: cor_dist
Supplementary Table 2: P-values associated with one-sided paired t-tests assessing whether the cor-dist performance score of MGPfact significantly higher than the other methods on the different trajectory types in test set.
Dataset Trajectory Type	DPT	Monocle DDRTree	Monocle 3	scFates.Tree	scShaper	TInGa	TSCAN
Acyclic Graph	0.0210447	0.771758	0.677769	0.276092	0.505103	0.996378	0.203939
Bifurcation	0.130923	0.986575	0.936698	0.749329	0.993633	0.999006	0.00208914
Convergence	0.595209	0.999407	0.799551	0.445044	0.987111	0.990794	0.0173909
Cycle	0.000788314	0.999068	0.998152	0.358383	0.994486	0.999988	0.658133
Disconnected Graph	0.0114114	0.999848	0.999522	0.934682	0.527347	0.992099	0.0654239
Connected Graph	0.0556023	0.999232	0.968557	0.415454	0.976123	0.999962	0.0279783
Linear	0.0270839	0.998986	0.99921	0.874687	0.999998	0.999934	0.0275154
Multifurcation	0.0635834	0.514429	0.120185	0.757966	0.569273	0.731489	0.015015
Tree	0.00300952	0.999991	0.992805	0.223075	0.699073	0.999988	1.52898e-05

## Sheet: F1_branches
Supplementary Table 2: P-values associated with one-sided paired t-tests assessing whether the F1-branches performance score of MGPfact significantly higher than the other methods on the different trajectory types in test set.
Dataset Trajectory Type	DPT	Monocle DDRTree	Monocle 3	scFates.Tree	scShaper	TInGa	TSCAN
Acyclic Graph	0.169327	0.73452	0.340595	0.1669	0.00591454	0.484606	0.00226001
Bifurcation	0.558957	0.0011785	0.0150233	0.298057	0.0101258	0.772228	0.00228631
Convergence	0.274748	0.0590634	0.000121693	0.0270877	0.120436	0.871117	0.00770396
Cycle	0.000149323	7.94202e-06	0.0023565	0.114499	0.99064	0.658649	0.981518
Disconnected Graph	0.0203978	0.000570265	0.107957	0.00728456	0.00125772	0.474928	0.000162914
Connected Graph	0.05338	0.214018	0.114414	0.285326	0.00533996	0.0567308	0.000560729
Linear	1.5924e-14	1.26786e-18	1.44672e-06	0.000108403	0.999995	3.7682e-06	0.98041
Multifurcation	0.0330391	0.000722083	0.0406782	0.716518	0.552217	0.758067	0.0505137
Tree	0.0205288	0.809422	0.9181	0.0855124	1.51172e-12	0.993414	4.86006e-12
