# Supplementary material for: A model-based factorization method for scRNA data unveils bifurcating transcriptional modules underlying cell fate determination
Source: eLife. 2025 Feb 5;13:RP97424. doi: 10.7554/eLife.97424 (PMC11798574; doi:10.7554/eLife.97424)
Supplement: Supplementary file 3. [file elife-97424-supp3.xlsx]

## Sheet: supplementary_table3
Supplementary file 3: Comparison of memory utilization (GB) and temporal efficiency (min)
	The average maximum memory usage (GB)	Elapsed time (min)
TinGa	0.55	0.163
Monocle 3	0.68	0.537
TSCAN	0.68	0.643
ScShaper	0.91	0.833
scFates Tree	0.68	0.93
DPT	0.68	2.418
MGPfact	0.75	3.42
Monocle DDRTree	0.67	7.497
