# Supplementary material for: A model-based factorization method for scRNA data unveils bifurcating transcriptional modules underlying cell fate determination
Source: eLife. 2025 Feb 5;13:RP97424. doi: 10.7554/eLife.97424 (PMC11798574; doi:10.7554/eLife.97424)
Supplement: Supplementary file 4. [file elife-97424-supp4.xlsx]

## Sheet: supplementary_table4
Supplementary file 4: The highly weighted genes associated with independent bifurcating processes in microglia development (absolute gene weight > 0.05).
Trajectory 1		Trajectory 2		Trajectory 3
Gene	Weight	Gene	Weight	Gene	Weight
Apoe	0.243601	Psen1	-0.0501024	ERCC-00002	0.245096
Lyz2	0.148019	Arhgap19	-0.0504465	Cst3	0.218104
Lpl	0.139761	Ctsl	-0.0505587	Tmem119	0.203839
Cd63	0.132272	Nusap1	-0.0506486	Selplg	0.185561
Spp1	0.118584	Pcyox1	-0.0507102	P2ry12	0.182115
Pkm2	0.11162	ERCC-00108	-0.0507653	ERCC-00046	0.174178
Ftl1	0.110256	Ncaph	-0.051056	ERCC-00108	0.157314
Ctsl	0.110196	Kif2c	-0.0512433	Siglech	0.130478
Ldha	0.108982	Incenp	-0.0513004	4632428N05Rik	0.122993
Plek	0.0983842	Ivns1abp	-0.051655	P2ry13	0.11915
Hif1a	0.098284	Kif15	-0.0516846	Sepp1	0.116364
Gatm	0.0935116	Iqgap3	-0.0522665	Gpr56	0.114647
Abca1	0.0904025	Nuf2	-0.0524976	Slco2b1	0.104886
Pld3	0.0900435	Lrrc33	-0.0525164	Itgb5	0.102031
Sepp1	0.0897153	Fam64a	-0.052832	Gpr34	0.100719
Plin2	0.0887099	Atf7ip	-0.0536332	ERCC-00022	0.0940466
Mcm6	0.0882211	Asf1b	-0.0546244	Ctsh	0.0930657
Atp6v1b2	0.0829249	Spc25	-0.0548259	Fgd2	0.0927444
Wdr1	0.0827963	Ncapg	-0.0551058	Cmtm6	0.0895944
Mcm3	0.0812681	Aurka	-0.0551771	Slc2a5	0.0887795
Cd83	0.0798333	Ogdh	-0.0556775	Ptgs1	0.08778
C3ar1	0.0720651	Kif20b	-0.0562531	Rps6ka1	0.0867954
Igf1	0.0711307	Hmmr	-0.0566873	ERCC-00092	0.0867522
Anxa5	0.0699175	Anln	-0.056961	Itgam	0.0849403
Cd9	0.0676295	Gatm	-0.0569746	Entpd1	0.0849238
Sgpl1	0.067552	Mis18bp1	-0.0571385	Ivns1abp	0.0844637
Gas6	0.0648125	P2ry13	-0.0572295	Ftl1	0.0843729
Serpine2	0.062383	Bub1b	-0.057463	Jun	0.0824494
Abcg1	0.0619767	Tln1	-0.0578022	Serpine2	0.0736114
Stab1	0.0609743	Pom121	-0.0581335	ERCC-00112	0.0732127
Soat1	0.0604953	C3ar1	-0.0582562	Gal3st4	0.072788
Tpi1	0.0588845	Fen1	-0.0583984	Lair1	0.0726473
Sec61a1	0.0582809	Ldha	-0.0591472	Cd164	0.0722834
Vps35	0.0571902	Pbk	-0.0595754	Il6ra	0.0718931
Myo1f	0.0553678	P2ry12	-0.0600705	Rab3il1	0.0711357
Slc23a2	0.0542931	Casc5	-0.0602761	Junb	0.071006
Glt25d1	0.0539383	Cenpf	-0.0603078	Tmem173	0.0708186
Gpx3	0.0537402	Nde1	-0.0606653	Ssh2	0.0678546
Hspa5	0.0536196	Lpl	-0.0606736	Ctsl	0.0671255
Itgb1	0.0534302	Sec61a1	-0.0608144	Csf3r	0.0667173
Dab2	0.0528664	Lbr	-0.0608641	ERCC-00116	0.0642298
Txndc5	0.0523542	Neil3	-0.0627137	Hspa5	0.0634389
Lrp1	0.0518027	Plk1	-0.0628124	Sgk1	0.0594574
Gpnmb	0.0516257	E130306D19Rik	-0.0628218	Dusp6	0.0592808
Asph	0.0501417	Actn4	-0.0631394	Macf1	0.0592453
Tgfbr1	-0.0502059	Kif20a	-0.0635821	Tgfbr1	0.0584619
H1f0	-0.0506033	Tpx2	-0.0635854	Tcn2	0.0582778
Iqgap3	-0.0510038	Itgb1	-0.063689	Gna15	0.0582041
E130306D19Rik	-0.0511327	Anapc5	-0.0642652	Mertk	0.0581559
4632428N05Rik	-0.051897	Cdca2	-0.0645301	Pisd-ps3	0.0574244
Kpna2	-0.05199	Cdca8	-0.0647416	Pla2g15	0.0573416
Ier5	-0.0526949	Wdr1	-0.0653494	Lrrc3	0.0566618
Ivns1abp	-0.0528462	Ckap2l	-0.0658988	Btg2	0.0557477
Casc5	-0.0531819	Sepp1	-0.0667311	Slc7a8	0.055233
Kif20a	-0.0534329	Ccnb2	-0.0669069	1500010J02Rik	0.054214
Lmf2	-0.0548743	Mrc1	-0.0673883	Hmha1	0.0539479
Ccnb1	-0.0568614	Wsb1	-0.0675775	Slc40a1	0.0523213
Aurkb	-0.058447	H1f0	-0.0682533	Il10ra	0.0520245
Cdc20	-0.0618077	Ftl1	-0.0685254	Cd9	0.050893
Ccna2	-0.0619853	Lmf2	-0.0691162	Tpst2	0.0507708
Jun	-0.0620061	Kif22	-0.0694634	Txnip	0.0503816
St3gal6	-0.0622715	Cenpe	-0.0701196	Top2a	-0.06003
P2ry12	-0.0628894	Mgat4a	-0.0706462	Mki67	-0.0666323
Top2a	-0.0631596	Kif11	-0.072186
Gpr165	-0.0660818	Aurkb	-0.0731139
Prc1	-0.0696839	Smc4	-0.0732056
Arl6ip1	-0.0734893	Rrm1	-0.0733486
Ccnf	-0.0747505	Racgap1	-0.0747485
Slco2b1	-0.0802441	Tubb4b	-0.0751767
Mki67	-0.103092	Rrm2	-0.0770252
Tmem119	-0.136411	Slc29a1	-0.0775018
Selplg	-0.160952	Ccnb1	-0.0780361
		Ncapd2	-0.0793627
		Tmpo	-0.0796547
		Tacc3	-0.0830509
		Prc1	-0.0833255
		Ccnf	-0.0847869
		Pkm2	-0.0868556
		Cdc20	-0.0901054
		Kpna2	-0.0940115
		Ccna2	-0.0955896
		Arsb	-0.09653
		ERCC-00002	-0.0991586
		Hnrnpu	-0.103095
		Cd164	-0.105041
		Top2a	-0.116098
		Arl6ip1	-0.117631
		Tubb5	-0.131704
		Mki67	-0.138164
		Apoe	-0.155682
