# Supplementary material for: A model-based factorization method for scRNA data unveils bifurcating transcriptional modules underlying cell fate determination
Source: eLife. 2025 Feb 5;13:RP97424. doi: 10.7554/eLife.97424 (PMC11798574; doi:10.7554/eLife.97424)
Supplement: Supplementary file 5. — PAM-T1 cells (n=113) vs. PAM-T2 cells (n=298), two-sided moderated t-test with limma. [file elife-97424-supp5.xlsx]

## Sheet: supplementary_table5
Supplementary file 5: List of genes specifically expressed in HM. PAM-T1 cells (n = 113) vs. PAM-T2 cells (n = 298), two-sided moderated t-test with limma
Gene	logFC	AveExpr	t	P.Value	adj.P.Val	B
Spp1	-2.51674	3.5416	-9.96149	4.31773e-21	1.05547e-17	36.8428
Gpnmb	-1.73307	1.83483	-10.578	2.66061e-23	1.30077e-19	41.7296
Lgals3	-0.960456	1.0042	-7.60541	1.93611e-13	1.05174e-10	19.9534
Igf1	-0.863437	1.55006	-8.4662	4.47715e-16	3.64813e-13	25.7635
Lgals1	-0.793148	0.905351	-8.99709	8.5142e-18	1.38753e-14	29.5623
Anxa5	-0.753807	1.74371	-7.01881	9.23854e-12	3.22623e-09	16.2614
Soat1	-0.75149	1.46571	-7.04897	7.61592e-12	2.86417e-09	16.4457
Anxa2	-0.73086	1.04158	-7.45586	5.30003e-13	2.59119e-10	18.9907
Cd9	-0.730838	3.04984	-7.17959	3.2765e-12	1.3349e-09	17.2507
Capg	-0.696155	0.743621	-7.70675	9.70541e-14	5.93122e-11	20.6137
Pkm2	-0.610674	2.75203	-6.88427	2.16975e-11	6.62995e-09	15.4471
Ldha	-0.571124	2.42876	-5.26435	2.26725e-07	4.61858e-05	6.66659
Aplp2	-0.543965	1.46817	-5.18778	3.34264e-07	5.83648e-05	6.30099
Cd63	-0.540293	2.63678	-7.20843	2.71547e-12	1.2069e-09	17.43
Abcg1	-0.527077	1.45391	-5.24952	2.44524e-07	4.63967e-05	6.59538
Lilrb4	-0.515451	0.778455	-5.13853	4.27999e-07	7.21548e-05	6.06836
Plin2	-0.513566	2.09139	-4.5193	8.11338e-06	0.000991658	3.3115
Apoe	-0.512224	5.30523	-6.52002	2.05539e-10	5.91107e-08	13.3052
Tpi1	-0.501702	1.54679	-5.00953	8.10399e-07	0.000120062	5.46819
Hpse	-0.473512	0.756792	-5.01501	7.8891e-07	0.000120062	5.49343
Atp6v0d2	-0.47127	0.400575	-5.28095	2.083e-07	4.42773e-05	6.74645
Ctsl	-0.470461	3.47027	-6.0874	2.62469e-09	7.12895e-07	10.8844
Colec12	-0.445625	0.527762	-5.24774	2.46741e-07	4.63967e-05	6.58688
Gpx3	-0.4198	1.58313	-4.27692	2.35668e-05	0.00230436	2.31922
Dab2	-0.4166	1.15775	-4.31367	2.01115e-05	0.0021375	2.46647
Ftl1	-0.41155	4.08654	-8.27823	1.75132e-15	1.22317e-12	24.4568
Pld3	-0.410446	2.49417	-3.99418	7.68552e-05	0.00636856	1.22499
Tubb5	-0.396997	2.1406	-4.21222	3.10705e-05	0.00276188	2.06275
Lpl	-0.369127	2.32056	-3.07828	0.00222088	0.0733517	-1.83828
Ccl9	-0.366352	1.12355	-3.21972	0.00138455	0.0609825	-1.41416
Clec7a	-0.338807	0.886647	-3.41568	0.000699258	0.0371595	-0.796748
BC021767	-0.315315	0.267103	-5.54213	5.33581e-08	1.30434e-05	8.03166
Lair1	-0.313983	1.08646	-3.23961	0.00129378	0.0592053	-1.35309
Ms4a6c	-0.307071	0.318883	-5.45368	8.51322e-08	1.98196e-05	7.59042
Serpinb6a	-0.302668	0.323038	-5.10801	4.98377e-07	8.12188e-05	5.92516
Mcm6	-0.302001	0.598902	-3.00205	0.00284455	0.0843389	-2.05931
Itgax	-0.287292	0.404563	-3.70512	0.000240054	0.017009	0.177907
Gla	-0.285895	0.384666	-4.39099	1.43542e-05	0.00163204	2.78004
Rpa1	-0.269165	0.449746	-3.46897	0.000577417	0.0324482	-0.622906
Rasal3	0.25752	0.545373	3.22472	0.00136118	0.0604985	-1.39884
Cybasc3	0.270469	0.603124	2.93463	0.00352587	0.0916915	-2.25039
Gpr34	0.288811	2.1908	3.08379	0.00218109	0.0730368	-1.8221
Eif3b	0.291563	0.605903	3.42129	0.000685397	0.0368232	-0.778585
Egr1	0.292413	0.292489	4.29634	2.16761e-05	0.0022078	2.39688
Gcn1l1	0.296657	0.416979	3.88764	0.000117914	0.00915048	0.830556
Abcc3	0.297437	0.732243	3.18585	0.00155287	0.0618952	-1.51737
Asph	0.30009	1.33321	3.18503	0.00155719	0.0618952	-1.51987
Il6ra	0.304367	1.14922	3.14736	0.001767	0.0639914	-1.63341
Slc38a10	0.314258	0.74539	3.59344	0.000365716	0.0239473	-0.206956
Selplg	0.31565	0.805644	3.45004	0.000618233	0.0338981	-0.684962
Dnm2	0.325133	0.864251	3.55298	0.000424864	0.0259785	-0.343677
Fscn1	0.330097	0.462152	3.93375	9.80883e-05	0.00786154	1.00006
Slc2a5	0.336235	0.378027	4.23642	2.80299e-05	0.00264729	2.15827
Ptgs1	0.340223	0.97975	3.15216	0.00173891	0.0634441	-1.61902
Itgam	0.362869	1.06026	3.78713	0.000175025	0.0129179	0.467543
Fgd2	0.368883	1.06188	3.51081	0.000495981	0.0291005	-0.484637
Slc7a8	0.373553	1.17905	4.02857	6.68014e-05	0.00572969	1.35441
Pisd-ps3	0.404645	0.539552	4.6222	5.08433e-06	0.000671819	3.74771
Cd164	0.421254	2.04527	4.5364	7.51151e-06	0.000941635	3.38339
Junb	0.422623	0.487647	5.32668	1.64742e-07	3.66102e-05	6.96758
Entpd1	0.444705	1.39417	4.55528	6.89688e-06	0.000887337	3.46304
Slco2b1	0.500455	1.16203	4.3961	1.40353e-05	0.00163204	2.80094
Tmem119	0.555801	0.774177	4.92851	1.20194e-06	0.000172832	5.09813
P2ry12	0.818497	2.08835	6.98811	1.12382e-11	3.66289e-09	16.0745
Siglech	0.881439	1.45179	8.69184	8.47434e-17	8.28621e-14	27.3589
