# Supplementary material for: A model-based factorization method for scRNA data unveils bifurcating transcriptional modules underlying cell fate determination
Source: eLife. 2025 Feb 5;13:RP97424. doi: 10.7554/eLife.97424 (PMC11798574; doi:10.7554/eLife.97424)
Supplement: Supplementary file 6. — Adjusted R-squared values and p-values based on F-tests demonstrate the relative performance of MGPfact, Monocle 2, Monocle 3, and scFates Tree in fitting the experimentally characterized and annotated CD8+ T cell subtypes. [file elife-97424-supp6.xlsx]

## Sheet: supplementary_table6
Supplementary file 6: Comparison of the explanatory power for CD8+ T cell fate for MGPfact and three other different methods. Adjusted R-squared values and P-values based on F-tests demonstrate the relative performance of MGPfact, Monocle 2, Monocle 3, and scFates Tree in fitting the experimentally characterized and annotated CD8+ T cell subtypes.
		MGPfact			Monocle 2			Monocle 3			scFates Tree
		Adjust R-squared	P-value	F	Adjust R-squared	P-value	F	Adjust R-squared	P-value	F	Adjust R-squared	P-value	F
NSCLC (GSE99254)	CD8-LEF1	0.935	1.5e-32	80.6572	0.1757	0.0002	4.007	0.089	0.08	3.3466	0.902	4.32e-11	227.898
	CD8-CD28	0.1949	0.0021	3.9055	0.1698	0.0002	3.8865	0.108	0.06	3.9062	0.006	0.145	2.142
	CD8-CX3CR1	0.6337	4.32e-11	10.5811	0.2587	8.31e-07	5.9237	0.629	4.32e-11	41.636	0.882	4.32e-11	246.703
	CD8-GZMK	0.2591	0.0003	4.5968	0.1887	5.14e-06	8.3857	0.855	4.32e-11	15.202	0.547	4.32e-11	40.657
	CD8-ZNF683	0.2319	0.0009	4.1046	0.0513	0.0428	2.3748	0.625	0.003	5.001	0.039	0.003	8.89
	CD8-LAYN	0.4349	3.93e-06	5.2617	0.0306	0.027	5.0077	0.503	0.018	3.432	0.523	4.32e-11	37.032
CRC (GSE108989)	CD8-LEF1	0.311	0.0001	4.0208	0.0269	0.0363	4.4787	0.461	0.007	4.767	0.99	4.32e-11	1591.34
	CD8-GPR183	0.3802	2.3e-06	5.1052	0.0317	0.0253	5.1236	0.474	0.006	4.958	0.139	0.0001	3.677
	CD8-CX3CR1	0.6481	1.44e-14	13.3263	0.0466	0.0084	7.1611	0.454	0.007	4.67	0.817	4.32e-11	74.781
	CD8-GZMK	0.1302	0.0132	2.6279	0.5499	1.61e-18	18.1055	0.855	4.32e-11	26.993	0.236	4.32e-11	62.443
	CD8-CD6	0.2766	3.43e-05	5.1579	0.1092	0.0066	2.7156	0.45	0.008	4.605	0.054	0.0006	12.3
	CD8-CD160	0.1243	0.0161	2.5436	0.0804	0.0251	2.2237	0.856	4.32e-11	27.249	0.707	4.32e-11	35.246
	CD8-LAYN	0.741	3.01e-19	20.1484	0.1724	0.0002	3.9159	0.373	0.021	3.621	0.505	4.32e-11	19.489
