# Supplementary material for: A model-based factorization method for scRNA data unveils bifurcating transcriptional modules underlying cell fate determination
Source: eLife. 2025 Feb 5;13:RP97424. doi: 10.7554/eLife.97424 (PMC11798574; doi:10.7554/eLife.97424)
Supplement: Supplementary file 7. [file elife-97424-supp7.xlsx]

## Sheet: supplementary_table7
Supplementary file 7: The highly weighted genes associated with the CD8+ T cell independent bifurcating processes in NSCLC (absolute gene weight > 0.05).
Trajectory 1		Trajectory 2		Trajectory 3
Gene	Weight	Gene	Weight	Gene	Weight
SELL	0.122778	RGS1	0.102529	FOS	0.136797
IL7R	0.119123	GPR183	0.0586484	NR4A2	0.131323
CCR7	0.0979392	GZMK	0.05424	FOSB	0.125458
LEF1	0.0921199	S100A10	-0.0502359	ITGA1	0.12354
RIPOR2	0.0734715	A2M	-0.0503157	RGS1	0.106439
S1PR1	0.0690686	RAD9A	-0.0504213	PTGER4	0.105985
TCF7	0.0690592	PSMA2	-0.0505545	CD69	0.105135
NOSIP	0.0660778	MTSS1	-0.0506913	TNFAIP3	0.104445
PIM2	0.0651974	STK38	-0.0508464	BTG2	0.103516
LDHB	0.064241	TBX21	-0.0508471	NR4A1	0.102373
PLAC8	0.0634493	ITGB1	-0.050975	CAPG	0.10229
TXK	0.0630132	LIMD2	-0.051028	ZNF331	0.0989879
DGKA	0.0610016	RPL5	-0.051142	GPR15	0.0984886
SERINC5	0.0607821	CD47	-0.0513479	ITGAE	0.0975589
MAL	0.0598235	CD52	-0.0515289	RGS2	0.0972697
FCMR	0.0597335	PSMB8	-0.0515633	PPP1R15A	0.094161
LRRC75A-AS1	0.0570353	CYTH1	-0.051597	NR4A3	0.0939202
BIRC3	0.0559814	GZMA	-0.0516345	CREM	0.0933447
MYC	0.0557553	CDK2AP2	-0.0516505	JAML	0.0924649
LDLRAP1	0.0552081	GTF3A	-0.0517434	MYADM	0.09105
THEM4	0.0544936	ITGAL	-0.0524397	ZFP36	0.0875214
TMEM123	0.0537222	ATP5G3	-0.0527555	CD160	0.0863395
RPS5	0.0534863	ARPC2	-0.0527569	PELO	0.0847025
ADD3	0.0534615	SUB1	-0.0530848	CSRNP1	0.0829565
EEF1G	0.0526783	EIF3L	-0.0531094	PFKFB3	0.0826525
ICAM2	0.0523851	C1orf21	-0.053331	ANKRD28	0.0809785
EEF2	0.0512545	ITGB7	-0.0534484	KLRC2	0.0808434
RACK1	0.0506414	SYNE1	-0.0538115	YPEL5	0.0803765
RPLP0	0.0500791	RASSF1	-0.0541283	TMIGD2	0.0779667
CAPG	-0.0509089	LILRB1	-0.0541307	ITM2C	0.0777218
HLA-DQB1	-0.0511188	FTL	-0.0541879	PTPN22	0.0775177
OASL	-0.0511849	TTC38	-0.0543726	LDLRAD4	0.0767307
LYST	-0.0512653	IDH2	-0.0543813	FAM46C	0.0765241
KLRC3	-0.0513786	NACA	-0.0548098	SAMSN1	0.0762235
TNIP3	-0.0528126	HLA-DPB1	-0.0551026	KLRC3	0.0753108
HAVCR2	-0.0528419	ABI3	-0.0559802	MCL1	0.0737932
CHST12	-0.0531795	ADRB2	-0.0563332	JUN	0.0735083
CCL3	-0.0536317	ATP5B	-0.0563777	RANBP2	0.0724019
CD74	-0.0537102	CD8B	-0.0567094	PER1	0.071258
IL2RB	-0.0538134	ID2	-0.0570668	FOSL2	0.071039
PELO	-0.0538394	BTF3	-0.0574163	GPR65	0.0702874
F2R	-0.0548073	MYO1G	-0.0575321	JUNB	0.0702559
KLRC2	-0.0550002	ARL6IP1	-0.0576482	DNAJA1	0.0697703
HLA-DQA1	-0.0557237	CD8A	-0.0580668	EGR1	0.0687639
CD69	-0.0559741	ADD3	-0.0581383	NFKBIZ	0.0681
ALOX5AP	-0.0563891	RHOA	-0.0583966	HOPX	0.0680743
KLRC1	-0.0566536	PATL2	-0.0586596	SYTL3	0.0680412
CTSD	-0.0568003	KLF2	-0.0589457	SDCBP	0.0671036
ADGRE5	-0.058539	TARP	-0.0591236	ABCB1	0.0670927
TBCD	-0.0588068	SPON2	-0.0596036	CD55	0.0668353
APOBEC3C	-0.0598594	SLAMF7	-0.0596088	RASGEF1B	0.0662659
ID2	-0.0625017	SPN	-0.0596257	CLDND1	0.0660643
CRTAM	-0.0633961	PTP4A2	-0.0596508	SERTAD1	0.0658946
ITM2C	-0.0647882	CCND3	-0.0600742	MAP3K8	0.0650033
PTPN22	-0.0657595	SLC9A3R1	-0.0605165	CD96	0.063823
ANAPC1P1	-0.0664255	EMP3	-0.0625229	LOC100130476	0.0633042
ABI3	-0.0666702	MYO1F	-0.0640036	NFKBIA	0.0629631
LAG3	-0.0688838	FCGR3B	-0.0641535	LINC-PINT	0.0629515
FASLG	-0.0696218	SAMD3	-0.0642408	KLRC1	0.0624846
HLA-DPB1	-0.0696918	ACTR3	-0.0642652	ID2	0.0621278
HLA-DRA	-0.0706293	ITGB2	-0.0644633	TIPARP	0.0619754
SLAMF7	-0.0716489	CTSC	-0.0647338	GPR171	0.0619719
CD63	-0.0728554	ARPC4	-0.0653169	REL	0.0616394
RGS1	-0.0742834	TGFBR3	-0.0654881	DNAJB1	0.0609791
HLA-DPA1	-0.0747228	TPST2	-0.0671982	SIK1	0.0606986
HLA-DRB6	-0.0808249	EFHD2	-0.0674786	DUSP2	0.060012
ITGAE	-0.0841421	PPP1CA	-0.0676142	CXCR4	0.059582
GZMK	-0.0856226	APMAP	-0.0683852	PDE4B	0.0594222
HLA-DRB5	-0.0862364	CST7	-0.0701685	LOC284454	0.058737
CXCR6	-0.0866709	AES	-0.0701941	TSPYL2	0.0585327
ZNF683	-0.0867767	ZEB2	-0.0704271	SKIL	0.0582607
ITGA1	-0.0873144	S1PR5	-0.07094	SLA2	0.0577346
TARP	-0.089377	RIPOR2	-0.0711614	CD8A	0.0575084
HLA-DRB1	-0.0921543	RAP1B	-0.0721023	SYTL2	0.0569692
CST7	-0.0965038	PRSS23	-0.0724708	SPRY1	0.0566146
AOAH	-0.09768	BIN2	-0.077017	IL18RAP	0.0564252
APOBEC3G	-0.100734	PXN	-0.0782942	DDX3X	0.0560005
CTSW	-0.100956	FGR	-0.0791928	CCL4	0.0557441
PRF1	-0.101313	C12orf75	-0.0800891	CLK1	0.0552001
KLRD1	-0.102226	FLNA	-0.0806658	IVNS1ABP	0.0550637
CCL4L1	-0.105452	KLRG1	-0.0816884	BRE-AS1	0.0549564
CD8B	-0.129086	CTSW	-0.0839222	PRMT9	0.0547441
GZMH	-0.129583	PLAC8	-0.0848313	ZFAND5	0.0541158
GZMB	-0.140274	S1PR1	-0.0878552	AOAH	0.0538383
GZMA	-0.140519	FCRL6	-0.090992	PDE4D	0.0535835
CCL4	-0.150688	UCP2	-0.0931405	CD7	0.0531411
NKG7	-0.156969	NKG7	-0.100581	CCL5	0.052854
CCL5	-0.165306	GZMB	-0.103865	PDCD4	0.0523388
CD8A	-0.195194	PRF1	-0.107319	ABLIM1	0.0519223
		ADGRG1	-0.107721	FAM53C	0.0510362
		PLEK	-0.108487	SLC2A3	0.0510117
		GZMH	-0.115028	PDE4A	0.0507678
		FCGR3A	-0.115482	G3BP2	0.050304
		LITAF	-0.115694	ARHGAP9	0.0502249
		CX3CR1	-0.116612	PATL2	-0.0500804
		GNLY	-0.117477	TMEM173	-0.0505608
		FGFBP2	-0.123522	CD27-AS1	-0.050661
		KLRD1	-0.129589	SH2D1A	-0.0518199
				GIMAP7	-0.0527003
				SYNE1	-0.0528729
				SELL	-0.052895
				ADGRG1	-0.0532511
				HLA-DPB1	-0.0537107
				ITGB2-AS1	-0.0541024
				FCGR3A	-0.0541523
				ADD3	-0.055451
				CD27	-0.0554842
				UCP2	-0.0589054
				PXN	-0.0593398
				A2M	-0.0612818
				FGFBP2	-0.0625118
				GIMAP4	-0.0631316
				S1PR1	-0.0642201
				ITGB1	-0.0666761
				LINC00861	-0.0671325
				CX3CR1	-0.0677376
				GZMH	-0.068371
				SAMD3	-0.0690368
				RIPOR2	-0.0720321
				KLRG1	-0.0741208
				PLEK	-0.0748601
				ITGB2	-0.116041
