# Supplementary material for: A model-based factorization method for scRNA data unveils bifurcating transcriptional modules underlying cell fate determination
Source: eLife. 2025 Feb 5;13:RP97424. doi: 10.7554/eLife.97424 (PMC11798574; doi:10.7554/eLife.97424)
Supplement: Supplementary file 8. [file elife-97424-supp8.xlsx]

## Sheet: supplementary_table8
Supplementary file 8: The highly weighted genes associated with the CD8+ T cell independent bifurcating processes in CRC (absolute gene weight > 0.05).
Trajectory 1		Trajectory 2		Trajectory 3
Gene	Weight	Gene	Weight	Gene	Weight
IL7R	0.132984	CD8A	0.150626	FOS	0.136797
LTB	0.108418	TARP	0.135281	NR4A2	0.131323
SELL	0.0927906	KLRD1	0.122326	FOSB	0.125458
GPR183	0.0916535	FCRL6	0.119647	ITGA1	0.12354
CCR7	0.0890305	CCL5	0.112635	RGS1	0.106439
TMEM123	0.0779322	NKG7	0.108741	PTGER4	0.105985
LEF1	0.0730257	AOAH	0.108665	CD69	0.105135
CD28	0.0683619	SLAMF7	0.108286	TNFAIP3	0.104445
TCF7	0.0660528	PLEK	0.104889	BTG2	0.103516
FCMR	0.0624517	CD160	0.100634	NR4A1	0.102373
DGKA	0.0620937	FCGR3A	0.0987018	CAPG	0.10229
SERINC5	0.0532084	CTSW	0.0899321	ZNF331	0.0989879
LDLRAP1	0.0528124	HOPX	0.0890175	GPR15	0.0984886
PIK3IP1	0.050239	CX3CR1	0.0876762	ITGAE	0.0975589
PTPN22	-0.0500168	FGFBP2	0.0854931	RGS2	0.0972697
ARAP2	-0.0502322	STOM	0.0796927	PPP1R15A	0.094161
APMAP	-0.0504374	FGR	0.0788306	NR4A3	0.0939202
THEMIS	-0.0504602	KLRG1	0.0777019	CREM	0.0933447
KLRG1	-0.0507966	PTGER2	0.073168	JAML	0.0924649
GABARAPL1	-0.0509223	S1PR5	0.0694371	MYADM	0.09105
TNFSF4	-0.0511395	MBP	0.0690357	ZFP36	0.0875214
RAB27A	-0.0514247	SCML4	0.0686552	CD160	0.0863395
CCL3L1	-0.0514974	A2M	0.0650564	PELO	0.0847025
KLRC4	-0.0527624	KLRC3	0.0650061	CSRNP1	0.0829565
MIR155HG	-0.0528494	KLRC2	0.0627297	PFKFB3	0.0826525
CCL3L3	-0.0542894	ZEB2	0.0617514	ANKRD28	0.0809785
ADGRG5	-0.0544783	PLAC8	0.0615951	KLRC2	0.0808434
ITM2C	-0.054486	PRF1	0.0615937	YPEL5	0.0803765
TNIP3	-0.0551465	PATL2	0.0615174	TMIGD2	0.0779667
FCRL6	-0.0556823	TGFBR3	0.0610665	ITM2C	0.0777218
CD244	-0.0557878	CD244	0.0608876	PTPN22	0.0775177
BHLHE40	-0.0560685	MYO1F	0.0606251	LDLRAD4	0.0767307
PDCD1	-0.0563221	GPR15	0.0604501	FAM46C	0.0765241
RBPJ	-0.0574984	LYAR	0.0604259	SAMSN1	0.0762235
CXCR6	-0.0575878	GZMA	0.0602725	KLRC3	0.0753108
DUSP4	-0.057711	CST7	0.0597319	MCL1	0.0737932
PLEK	-0.0577375	ANXA1	0.0596249	JUN	0.0735083
CTSC	-0.0582145	ABI3	0.0590379	RANBP2	0.0724019
ID2	-0.0582509	XCL2	0.0562056	PER1	0.071258
CD74	-0.0589373	BIN2	0.0558686	FOSL2	0.071039
ITGA1	-0.0594322	S1PR1	0.0542717	GPR65	0.0702874
ANXA5	-0.0597251	ADGRG1	0.0542522	JUNB	0.0702559
F2R	-0.0601566	PTGDR	0.0527325	DNAJA1	0.0697703
IDH2	-0.0605085	GPR65	0.0524179	EGR1	0.0687639
CLEC2B	-0.0608373	ADRB2	0.0523687	NFKBIZ	0.0681
SH2D1A	-0.0611961	CD300A	0.052188	HOPX	0.0680743
DTHD1	-0.0612057	RASSF1	0.051236	SYTL3	0.0680412
ABI3	-0.0612407	TTC38	0.050959	SDCBP	0.0671036
SAMD3	-0.0648548	FCGR3B	0.0503225	ABCB1	0.0670927
CHST12	-0.0652938	INPP4B	-0.0500678	CD55	0.0668353
ZNF683	-0.0662101	SNX9	-0.0506196	RASGEF1B	0.0662659
HLA-DMA	-0.0673914	PLP2	-0.051171	CLDND1	0.0660643
EOMES	-0.0674026	TFRC	-0.0512433	SERTAD1	0.0658946
ADGRG1	-0.067744	RNF19A	-0.0512815	MAP3K8	0.0650033
CD63	-0.0686076	HLA-DQA1	-0.0519081	CD96	0.063823
GNLY	-0.0710733	SMC4	-0.052087	LOC100130476	0.0633042
CRTAM	-0.0728517	TOX	-0.0527549	NFKBIA	0.0629631
ZEB2	-0.0729721	HIF1A	-0.0528286	LINC-PINT	0.0629515
LYST	-0.0762094	PELI1	-0.0530546	KLRC1	0.0624846
LAG3	-0.0765649	TRAT1	-0.0532352	ID2	0.0621278
C12orf75	-0.0766277	PAG1	-0.0547596	TIPARP	0.0619754
VCAM1	-0.0770337	TNFSF10	-0.0550342	GPR171	0.0619719
ITGAE	-0.0775682	FKBP1A	-0.0553943	REL	0.0616394
AOAH	-0.0789858	GALM	-0.0558963	DNAJB1	0.0609791
FASLG	-0.080289	ENTPD1	-0.0559427	SIK1	0.0606986
OASL	-0.0814841	MYO7A	-0.0563329	DUSP2	0.060012
APOBEC3C	-0.0822513	NAMPT	-0.0565777	CXCR4	0.059582
HLA-DQB1	-0.0841979	TANK	-0.0572054	PDE4B	0.0594222
HLA-DQA1	-0.0843023	LGALS3	-0.0575505	LOC284454	0.058737
SLAMF7	-0.0849841	TNFSF4	-0.0583184	TSPYL2	0.0585327
TARP	-0.0852814	RGCC	-0.0595102	SKIL	0.0582607
IFNG	-0.0855629	TIAM1	-0.059867	SLA2	0.0577346
CXCL13	-0.0865601	MIR155HG	-0.0606952	CD8A	0.0575084
CCL3	-0.0887134	PDE4DIP	-0.061601	SYTL2	0.0569692
GZMK	-0.0912738	BATF	-0.0627031	SPRY1	0.0566146
HLA-DPA1	-0.0926284	ITM2A	-0.0647387	IL18RAP	0.0564252
HLA-DPB1	-0.0934845	IL6ST	-0.0655611	DDX3X	0.0560005
HAVCR2	-0.0951084	ACP5	-0.0657196	CCL4	0.0557441
CST7	-0.100833	CD28	-0.066245	CLK1	0.0552001
CCL4L1	-0.107448	BIRC3	-0.0676624	IVNS1ABP	0.0550637
KLRD1	-0.110238	VCAM1	-0.0691623	BRE-AS1	0.0549564
CTSW	-0.116416	NAB1	-0.0702113	PRMT9	0.0547441
HLA-DRB6	-0.118238	SIRPG	-0.0703857	ZFAND5	0.0541158
APOBEC3G	-0.118567	LYST	-0.0706977	AOAH	0.0538383
HLA-DRB5	-0.119245	TNFRSF18	-0.0720818	PDE4D	0.0535835
PRF1	-0.124685	HLA-DRA	-0.0723946	CD7	0.0531411
HLA-DRA	-0.125485	ARID5B	-0.0729209	CCL5	0.052854
HLA-DRB1	-0.128786	SAMSN1	-0.07413	PDCD4	0.0523388
CCL4	-0.14152	NDFIP2	-0.0752917	ABLIM1	0.0519223
CCL5	-0.146695	HNRNPLL	-0.0754815	FAM53C	0.0510362
GZMA	-0.14836	CXCR6	-0.0756293	SLC2A3	0.0510117
CD8A	-0.1608	PHLDA1	-0.0805611	PDE4A	0.0507678
NKG7	-0.163296	ADAM19	-0.080748	G3BP2	0.050304
GZMB	-0.165993	TNFRSF9	-0.0833783	ARHGAP9	0.0502249
GZMH	-0.168443	RGS1	-0.0841817	PATL2	-0.0500804
		TBC1D4	-0.0938903	TMEM173	-0.0505608
		DUSP4	-0.107232	CD27-AS1	-0.050661
		ICOS	-0.107918	SH2D1A	-0.0518199
		RBPJ	-0.108499	GIMAP7	-0.0527003
		CXCL13	-0.109952	SYNE1	-0.0528729
		PDCD1	-0.110447	SELL	-0.052895
		CTLA4	-0.110917	ADGRG1	-0.0532511
		HAVCR2	-0.114569	HLA-DPB1	-0.0537107
		CD27-AS1	-0.115842	ITGB2-AS1	-0.0541024
		CD27	-0.125598	FCGR3A	-0.0541523
		CD82	-0.14859	ADD3	-0.055451
				CD27	-0.0554842
				UCP2	-0.0589054
				PXN	-0.0593398
				A2M	-0.0612818
				FGFBP2	-0.0625118
				GIMAP4	-0.0631316
				S1PR1	-0.0642201
				ITGB1	-0.0666761
				LINC00861	-0.0671325
				CX3CR1	-0.0677376
				GZMH	-0.068371
				SAMD3	-0.0690368
				RIPOR2	-0.0720321
				KLRG1	-0.0741208
				PLEK	-0.0748601
				ITGB2	-0.116041
