# Supplementary material for: A model-based factorization method for scRNA data unveils bifurcating transcriptional modules underlying cell fate determination
Source: eLife. 2025 Feb 5;13:RP97424. doi: 10.7554/eLife.97424 (PMC11798574; doi:10.7554/eLife.97424)
Supplement: Supplementary file 9. [file elife-97424-supp9.xlsx]

## Sheet: Trajectory 1
Supplementary file 9: GO Enrichment Analysis Results for Highly Weighted Genes Associated with Trajectory 1 of NSCLC (Benjamini–Hochberg-adjusted P value < 0.05)
ID	Description	GeneRatio	BgRatio	pvalue	p.adjust	qvalue	geneID	Count	ONTOLOGY
GO:0019886	antigen processing and presentation of exogenous peptide antigen via MHC class II	9/83	30/18723	5.61105e-15	7.60587e-12	5.50863e-12	HLA-DQB1/CD74/HLA-DQA1/CTSD/HLA-DPB1/HLA-DRA/HLA-DPA1/HLA-DRB5/HLA-DRB1	9	BP
GO:0001909	leukocyte mediated cytotoxicity	13/83	124/18723	8.86982e-15	7.60587e-12	5.50863e-12	IL7R/LYST/HAVCR2/KLRC2/KLRC1/CRTAM/LAG3/HLA-DRA/SLAMF7/HLA-DRB1/PRF1/KLRD1/GZMB	13	BP
GO:0002495	antigen processing and presentation of peptide antigen via MHC class II	9/83	34/18723	2.02793e-14	1.1593e-11	8.39633e-12	HLA-DQB1/CD74/HLA-DQA1/CTSD/HLA-DPB1/HLA-DRA/HLA-DPA1/HLA-DRB5/HLA-DRB1	9	BP
GO:0002504	antigen processing and presentation of peptide or polysaccharide antigen via MHC class II	9/83	36/18723	3.614e-14	1.5495e-11	1.12224e-11	HLA-DQB1/CD74/HLA-DQA1/CTSD/HLA-DPB1/HLA-DRA/HLA-DPA1/HLA-DRB5/HLA-DRB1	9	BP
GO:0002478	antigen processing and presentation of exogenous peptide antigen	9/83	38/18723	6.21326e-14	2.13115e-11	1.5435e-11	HLA-DQB1/CD74/HLA-DQA1/CTSD/HLA-DPB1/HLA-DRA/HLA-DPA1/HLA-DRB5/HLA-DRB1	9	BP
GO:0002399	MHC class II protein complex assembly	7/83	16/18723	2.87775e-13	7.05048e-11	5.10638e-11	HLA-DQB1/HLA-DQA1/HLA-DPB1/HLA-DRA/HLA-DPA1/HLA-DRB5/HLA-DRB1	7	BP
GO:0002503	peptide antigen assembly with MHC class II protein complex	7/83	16/18723	2.87775e-13	7.05048e-11	5.10638e-11	HLA-DQB1/HLA-DQA1/HLA-DPB1/HLA-DRA/HLA-DPA1/HLA-DRB5/HLA-DRB1	7	BP
GO:0019884	antigen processing and presentation of exogenous antigen	9/83	47/18723	5.02973e-13	1.07825e-10	7.80931e-11	HLA-DQB1/CD74/HLA-DQA1/CTSD/HLA-DPB1/HLA-DRA/HLA-DPA1/HLA-DRB5/HLA-DRB1	9	BP
GO:0050870	positive regulation of T cell activation	14/83	216/18723	6.35556e-13	1.21109e-10	8.77142e-11	IL7R/CCR7/LEF1/HLA-DQB1/HAVCR2/CD74/HLA-DQA1/PTPN22/HLA-DPB1/HLA-DRA/HLA-DPA1/HLA-DRB5/HLA-DRB1/CCL5	14	BP
GO:0002501	peptide antigen assembly with MHC protein complex	7/83	18/18723	7.94858e-13	1.36318e-10	9.87298e-11	HLA-DQB1/HLA-DQA1/HLA-DPB1/HLA-DRA/HLA-DPA1/HLA-DRB5/HLA-DRB1	7	BP
GO:0002396	MHC protein complex assembly	7/83	19/18723	1.25405e-12	1.85109e-10	1.34067e-10	HLA-DQB1/HLA-DQA1/HLA-DPB1/HLA-DRA/HLA-DPA1/HLA-DRB5/HLA-DRB1	7	BP
GO:0019882	antigen processing and presentation	11/83	106/18723	1.29522e-12	1.85109e-10	1.34067e-10	CCR7/HLA-DQB1/CD74/HLA-DQA1/CTSD/HLA-DPB1/HLA-DRA/HLA-DPA1/HLA-DRB5/HLA-DRB1/CD8A	11	BP
GO:0001906	cell killing	13/83	188/18723	1.99003e-12	2.62531e-10	1.90141e-10	IL7R/LYST/HAVCR2/KLRC2/KLRC1/CRTAM/LAG3/HLA-DRA/SLAMF7/HLA-DRB1/PRF1/KLRD1/GZMB	13	BP
GO:1903039	positive regulation of leukocyte cell-cell adhesion	14/83	239/18723	2.52358e-12	3.09139e-10	2.23897e-10	IL7R/CCR7/LEF1/HLA-DQB1/HAVCR2/CD74/HLA-DQA1/PTPN22/HLA-DPB1/HLA-DRA/HLA-DPA1/HLA-DRB5/HLA-DRB1/CCL5	14	BP
GO:0048002	antigen processing and presentation of peptide antigen	9/83	62/18723	7.09793e-12	8.1153e-10	5.87759e-10	HLA-DQB1/CD74/HLA-DQA1/CTSD/HLA-DPB1/HLA-DRA/HLA-DPA1/HLA-DRB5/HLA-DRB1	9	BP
GO:0042267	natural killer cell mediated cytotoxicity	9/83	68/18723	1.68771e-11	1.80901e-09	1.3102e-09	LYST/HAVCR2/KLRC2/KLRC1/CRTAM/LAG3/SLAMF7/KLRD1/GZMB	9	BP
GO:0031341	regulation of cell killing	10/83	99/18723	1.89753e-11	1.91428e-09	1.38643e-09	IL7R/HAVCR2/KLRC2/KLRC1/CRTAM/LAG3/HLA-DRA/HLA-DRB1/PRF1/KLRD1	10	BP
GO:0002228	natural killer cell mediated immunity	9/83	71/18723	2.52338e-11	2.32064e-09	1.68074e-09	LYST/HAVCR2/KLRC2/KLRC1/CRTAM/LAG3/SLAMF7/KLRD1/GZMB	9	BP
GO:0022409	positive regulation of cell-cell adhesion	14/83	284/18723	2.57097e-11	2.32064e-09	1.68074e-09	IL7R/CCR7/LEF1/HLA-DQB1/HAVCR2/CD74/HLA-DQA1/PTPN22/HLA-DPB1/HLA-DRA/HLA-DPA1/HLA-DRB5/HLA-DRB1/CCL5	14	BP
GO:0001910	regulation of leukocyte mediated cytotoxicity	9/83	82/18723	9.54724e-11	8.18676e-09	5.92934e-09	IL7R/HAVCR2/KLRC2/KLRC1/CRTAM/LAG3/HLA-DRA/HLA-DRB1/KLRD1	9	BP
GO:0030217	T cell differentiation	13/83	257/18723	1.02162e-10	8.34323e-09	6.04267e-09	IL7R/CCR7/LEF1/TCF7/CD74/KLRC1/CRTAM/PTPN22/LAG3/HLA-DRA/ZNF683/HLA-DRB1/CD8A	13	BP
GO:1902105	regulation of leukocyte differentiation	12/83	279/18723	3.57954e-09	2.79042e-07	2.02099e-07	IL7R/LEF1/TCF7/MYC/CCL3/CD74/ID2/CRTAM/LAG3/HLA-DRA/ZNF683/HLA-DRB1	12	BP
GO:0045619	regulation of lymphocyte differentiation	10/83	174/18723	5.02307e-09	3.74546e-07	2.71269e-07	IL7R/LEF1/TCF7/CD74/ID2/CRTAM/LAG3/HLA-DRA/ZNF683/HLA-DRB1	10	BP
GO:0031343	positive regulation of cell killing	7/83	63/18723	1.17742e-08	8.41367e-07	6.09368e-07	KLRC2/CRTAM/LAG3/HLA-DRA/HLA-DRB1/PRF1/KLRD1	7	BP
GO:0045580	regulation of T cell differentiation	9/83	146/18723	1.67459e-08	1.14877e-06	8.32009e-07	IL7R/LEF1/TCF7/CD74/CRTAM/LAG3/HLA-DRA/ZNF683/HLA-DRB1	9	BP
GO:0030593	neutrophil chemotaxis	8/83	103/18723	1.78663e-08	1.17849e-06	8.53529e-07	CCR7/RIPOR2/CCL3/CD74/ITGA1/CCL4L1/CCL4/CCL5	8	BP
GO:0002381	immunoglobulin production involved in immunoglobulin-mediated immune response	7/83	70/18723	2.48839e-08	1.58059e-06	1.14476e-06	HLA-DQB1/HLA-DQA1/HLA-DPB1/HLA-DRA/HLA-DPA1/HLA-DRB5/HLA-DRB1	7	BP
GO:0032609	interferon-gamma production	8/83	112/18723	3.46005e-08	2.0462e-06	1.48198e-06	CCR7/TXK/HAVCR2/CRTAM/PTPN22/HLA-DPB1/HLA-DPA1/HLA-DRB1	8	BP
GO:0032649	regulation of interferon-gamma production	8/83	112/18723	3.46005e-08	2.0462e-06	1.48198e-06	CCR7/TXK/HAVCR2/CRTAM/PTPN22/HLA-DPB1/HLA-DPA1/HLA-DRB1	8	BP
GO:0042269	regulation of natural killer cell mediated cytotoxicity	6/83	44/18723	3.8973e-08	2.22796e-06	1.61362e-06	HAVCR2/KLRC2/KLRC1/CRTAM/LAG3/KLRD1	6	BP
GO:0070374	positive regulation of ERK1 and ERK2 cascade	10/83	217/18723	4.13549e-08	2.28786e-06	1.65701e-06	CCR7/HAVCR2/CCL3/CD74/F2R/PTPN22/HLA-DRB1/CCL4L1/CCL4/CCL5	10	BP
GO:0045088	regulation of innate immune response	10/83	218/18723	4.31889e-08	2.31465e-06	1.67641e-06	TXK/BIRC3/HAVCR2/KLRC2/KLRC1/CRTAM/PTPN22/LAG3/KLRD1/CCL5	10	BP
GO:0072676	lymphocyte migration	8/83	117/18723	4.87448e-08	2.53325e-06	1.83473e-06	CCR7/RIPOR2/S1PR1/CCL3/CRTAM/CCL4L1/CCL4/CCL5	8	BP
GO:0002706	regulation of lymphocyte mediated immunity	9/83	168/18723	5.66179e-08	2.77428e-06	2.0093e-06	IL7R/HAVCR2/KLRC2/KLRC1/CRTAM/LAG3/HLA-DRA/HLA-DRB1/KLRD1	9	BP
GO:0002833	positive regulation of response to biotic stimulus	9/83	168/18723	5.66179e-08	2.77428e-06	2.0093e-06	TXK/OASL/HAVCR2/KLRC2/CRTAM/LAG3/HLA-DRB1/KLRD1/CCL5	9	BP
GO:0002715	regulation of natural killer cell mediated immunity	6/83	48/18723	6.68015e-08	3.13385e-06	2.26972e-06	HAVCR2/KLRC2/KLRC1/CRTAM/LAG3/KLRD1	6	BP
GO:1990266	neutrophil migration	8/83	122/18723	6.76108e-08	3.13385e-06	2.26972e-06	CCR7/RIPOR2/CCL3/CD74/ITGA1/CCL4L1/CCL4/CCL5	8	BP
GO:0030595	leukocyte chemotaxis	10/83	230/18723	7.15016e-08	3.22698e-06	2.33717e-06	CCR7/RIPOR2/S1PR1/LYST/CCL3/CD74/ITGA1/CCL4L1/CCL4/CCL5	10	BP
GO:0001913	T cell mediated cytotoxicity	6/83	49/18723	7.58545e-08	3.33565e-06	2.41588e-06	IL7R/KLRC1/HLA-DRA/HLA-DRB1/PRF1/KLRD1	6	BP
GO:0071621	granulocyte chemotaxis	8/83	125/18723	8.17073e-08	3.5032e-06	2.53723e-06	CCR7/RIPOR2/CCL3/CD74/ITGA1/CCL4L1/CCL4/CCL5	8	BP
GO:0002695	negative regulation of leukocyte activation	9/83	187/18723	1.4192e-07	5.93642e-06	4.29951e-06	RIPOR2/HAVCR2/CD74/ID2/CRTAM/PTPN22/LAG3/HLA-DRB1/CST7	9	BP
GO:0001912	positive regulation of leukocyte mediated cytotoxicity	6/83	56/18723	1.71827e-07	7.01628e-06	5.08161e-06	KLRC2/CRTAM/LAG3/HLA-DRA/HLA-DRB1/KLRD1	6	BP
GO:0034341	response to interferon-gamma	8/83	141/18723	2.07686e-07	8.28329e-06	5.99925e-06	TXK/CCL3/CD74/FASLG/HLA-DPA1/CCL4L1/CCL4/CCL5	8	BP
GO:1990868	response to chemokine	7/83	97/18723	2.42244e-07	9.2322e-06	6.68651e-06	CCR7/RIPOR2/CCL3/CXCR6/CCL4L1/CCL4/CCL5	7	BP
GO:1990869	cellular response to chemokine	7/83	97/18723	2.42244e-07	9.2322e-06	6.68651e-06	CCR7/RIPOR2/CCL3/CXCR6/CCL4L1/CCL4/CCL5	7	BP
GO:0097530	granulocyte migration	8/83	148/18723	3.01386e-07	1.12365e-05	8.13812e-06	CCR7/RIPOR2/CCL3/CD74/ITGA1/CCL4L1/CCL4/CCL5	8	BP
GO:0050866	negative regulation of cell activation	9/83	210/18723	3.79483e-07	1.38471e-05	1.00289e-05	RIPOR2/HAVCR2/CD74/ID2/CRTAM/PTPN22/LAG3/HLA-DRB1/CST7	9	BP
GO:0031349	positive regulation of defense response	10/83	278/18723	4.15117e-07	1.48318e-05	1.07421e-05	CCR7/TXK/HAVCR2/CCL3/KLRC2/ALOX5AP/CRTAM/LAG3/KLRD1/CCL5	10	BP
GO:0002468	dendritic cell antigen processing and presentation	4/83	15/18723	4.72159e-07	1.62346e-05	1.17581e-05	CCR7/CD74/HLA-DRA/HLA-DRB1	4	BP
GO:0051250	negative regulation of lymphocyte activation	8/83	157/18723	4.73312e-07	1.62346e-05	1.17581e-05	RIPOR2/HAVCR2/CD74/ID2/CRTAM/PTPN22/LAG3/HLA-DRB1	8	BP
GO:0002456	T cell mediated immunity	7/83	109/18723	5.38414e-07	1.81055e-05	1.31131e-05	IL7R/KLRC1/HLA-DRA/HLA-DRB1/PRF1/KLRD1/CD8A	7	BP
GO:0046651	lymphocyte proliferation	10/83	288/18723	5.73647e-07	1.89193e-05	1.37025e-05	IL7R/LEF1/HAVCR2/CD74/CRTAM/PTPN22/HLA-DPB1/HLA-DPA1/HLA-DRB1/CCL5	10	BP
GO:0032943	mononuclear cell proliferation	10/83	291/18723	6.30543e-07	2.04034e-05	1.47774e-05	IL7R/LEF1/HAVCR2/CD74/CRTAM/PTPN22/HLA-DPB1/HLA-DPA1/HLA-DRB1/CCL5	10	BP
GO:0002703	regulation of leukocyte mediated immunity	9/83	226/18723	7.0272e-07	2.23179e-05	1.61639e-05	IL7R/HAVCR2/KLRC2/KLRC1/CRTAM/LAG3/HLA-DRA/HLA-DRB1/KLRD1	9	BP
GO:0001914	regulation of T cell mediated cytotoxicity	5/83	39/18723	7.7512e-07	2.35128e-05	1.70294e-05	IL7R/KLRC1/HLA-DRA/HLA-DRB1/KLRD1	5	BP
GO:0002347	response to tumor cell	5/83	39/18723	7.7512e-07	2.35128e-05	1.70294e-05	HAVCR2/CRTAM/ABI3/HLA-DRB1/PRF1	5	BP
GO:0032729	positive regulation of interferon-gamma production	6/83	72/18723	7.81475e-07	2.35128e-05	1.70294e-05	TXK/HAVCR2/CRTAM/PTPN22/HLA-DPB1/HLA-DPA1	6	BP
GO:0071346	cellular response to interferon-gamma	7/83	118/18723	9.2267e-07	2.72824e-05	1.97595e-05	TXK/CCL3/FASLG/HLA-DPA1/CCL4L1/CCL4/CCL5	7	BP
GO:0050868	negative regulation of T cell activation	7/83	122/18723	1.1557e-06	3.35937e-05	2.43305e-05	RIPOR2/HAVCR2/CD74/CRTAM/PTPN22/LAG3/HLA-DRB1	7	BP
GO:0048245	eosinophil chemotaxis	4/83	19/18723	1.32273e-06	3.78081e-05	2.73829e-05	CCL3/CCL4L1/CCL4/CCL5	4	BP
GO:0045089	positive regulation of innate immune response	7/83	131/18723	1.86488e-06	5.24307e-05	3.79735e-05	TXK/HAVCR2/KLRC2/CRTAM/LAG3/KLRD1/CCL5	7	BP
GO:0043547	positive regulation of GTPase activity	9/83	255/18723	1.91305e-06	5.29174e-05	3.83259e-05	CCR7/S1PR1/RACK1/CCL3/F2R/RGS1/CCL4L1/CCL4/CCL5	9	BP
GO:0071674	mononuclear cell migration	8/83	196/18723	2.52011e-06	6.8603e-05	4.96864e-05	CCR7/RIPOR2/S1PR1/CCL3/CRTAM/CCL4L1/CCL4/CCL5	8	BP
GO:0070098	chemokine-mediated signaling pathway	6/83	88/18723	2.56199e-06	6.86532e-05	4.97228e-05	CCR7/CCL3/CXCR6/CCL4L1/CCL4/CCL5	6	BP
GO:0072677	eosinophil migration	4/83	23/18723	2.98134e-06	7.80086e-05	5.64985e-05	CCL3/CCL4L1/CCL4/CCL5	4	BP
GO:0050921	positive regulation of chemotaxis	7/83	141/18723	3.04757e-06	7.80086e-05	5.64985e-05	CCR7/RIPOR2/S1PR1/CCL3/CD74/CCL4/CCL5	7	BP
GO:1903038	negative regulation of leukocyte cell-cell adhesion	7/83	141/18723	3.04757e-06	7.80086e-05	5.64985e-05	RIPOR2/HAVCR2/CD74/CRTAM/PTPN22/LAG3/HLA-DRB1	7	BP
GO:0001911	negative regulation of leukocyte mediated cytotoxicity	4/83	24/18723	3.56555e-06	8.99252e-05	6.51292e-05	IL7R/HAVCR2/KLRC1/KLRD1	4	BP
GO:0002690	positive regulation of leukocyte chemotaxis	6/83	94/18723	3.7687e-06	9.26046e-05	6.70698e-05	CCR7/RIPOR2/CCL3/CD74/CCL4/CCL5	6	BP
GO:0016064	immunoglobulin mediated immune response	8/83	207/18723	3.77978e-06	9.26046e-05	6.70698e-05	HLA-DQB1/CD74/HLA-DQA1/HLA-DPB1/HLA-DRA/HLA-DPA1/HLA-DRB5/HLA-DRB1	8	BP
GO:0019724	B cell mediated immunity	8/83	210/18723	4.20406e-06	0.000101549	7.35477e-05	HLA-DQB1/CD74/HLA-DQA1/HLA-DPB1/HLA-DRA/HLA-DPA1/HLA-DRB5/HLA-DRB1	8	BP
GO:0002418	immune response to tumor cell	4/83	26/18723	4.98271e-06	0.00011706	8.47816e-05	HAVCR2/CRTAM/HLA-DRB1/PRF1	4	BP
GO:0045954	positive regulation of natural killer cell mediated cytotoxicity	4/83	26/18723	4.98271e-06	0.00011706	8.47816e-05	KLRC2/CRTAM/LAG3/KLRD1	4	BP
GO:0097529	myeloid leukocyte migration	8/83	220/18723	5.92234e-06	0.000137254	9.94077e-05	CCR7/RIPOR2/CCL3/CD74/ITGA1/CCL4L1/CCL4/CCL5	8	BP
GO:0031342	negative regulation of cell killing	4/83	28/18723	6.77825e-06	0.000154996	0.000112257	IL7R/HAVCR2/KLRC1/KLRD1	4	BP
GO:0050670	regulation of lymphocyte proliferation	8/83	225/18723	6.98361e-06	0.000157591	0.000114137	HAVCR2/CD74/CRTAM/PTPN22/HLA-DPB1/HLA-DPA1/HLA-DRB1/CCL5	8	BP
GO:0032944	regulation of mononuclear cell proliferation	8/83	227/18723	7.451e-06	0.000165954	0.000120194	HAVCR2/CD74/CRTAM/PTPN22/HLA-DPB1/HLA-DPA1/HLA-DRB1/CCL5	8	BP
GO:0002699	positive regulation of immune effector process	8/83	235/18723	9.59439e-06	0.000210954	0.000152785	CD74/KLRC2/CRTAM/PTPN22/LAG3/HLA-DRA/HLA-DRB1/KLRD1	8	BP
GO:0001915	negative regulation of T cell mediated cytotoxicity	3/83	10/18723	9.85705e-06	0.000211311	0.000153044	IL7R/KLRC1/KLRD1	3	BP
GO:0035747	natural killer cell chemotaxis	3/83	10/18723	9.85705e-06	0.000211311	0.000153044	CCL3/CCL4/CCL5	3	BP
GO:0002717	positive regulation of natural killer cell mediated immunity	4/83	31/18723	1.03116e-05	0.000218326	0.000158125	KLRC2/CRTAM/LAG3/KLRD1	4	BP
GO:0042129	regulation of T cell proliferation	7/83	171/18723	1.08587e-05	0.000225998	0.000163681	HAVCR2/CRTAM/PTPN22/HLA-DPB1/HLA-DPA1/HLA-DRB1/CCL5	7	BP
GO:0002708	positive regulation of lymphocyte mediated immunity	6/83	113/18723	1.09375e-05	0.000225998	0.000163681	KLRC2/CRTAM/LAG3/HLA-DRA/HLA-DRB1/KLRD1	6	BP
GO:0019835	cytolysis	4/83	32/18723	1.1745e-05	0.000239794	0.000173673	PRF1/GZMH/GZMB/GZMA	4	BP
GO:0070663	regulation of leukocyte proliferation	8/83	245/18723	1.29857e-05	0.000262005	0.00018976	HAVCR2/CD74/CRTAM/PTPN22/HLA-DPB1/HLA-DPA1/HLA-DRB1/CCL5	8	BP
GO:0043122	regulation of I-kappaB kinase/NF-kappaB signaling	8/83	249/18723	1.45998e-05	0.000291147	0.000210866	CCR7/PIM2/BIRC3/TNIP3/CD74/F2R/FASLG/HLA-DRB1	8	BP
GO:0002761	regulation of myeloid leukocyte differentiation	6/83	120/18723	1.54278e-05	0.000304123	0.000220264	LEF1/MYC/CCL3/CD74/ID2/HLA-DRB1	6	BP
GO:0032814	regulation of natural killer cell activation	4/83	35/18723	1.69293e-05	0.000326671	0.000236595	HAVCR2/KLRC2/PTPN22/ZNF683	4	BP
GO:0002688	regulation of leukocyte chemotaxis	6/83	122/18723	1.69526e-05	0.000326671	0.000236595	CCR7/RIPOR2/CCL3/CD74/CCL4/CCL5	6	BP
GO:0050852	T cell receptor signaling pathway	6/83	123/18723	1.77594e-05	0.000338414	0.0002451	CCR7/TXK/HLA-DQB1/PTPN22/HLA-DPB1/HLA-DRB1	6	BP
GO:0043123	positive regulation of I-kappaB kinase/NF-kappaB signaling	7/83	186/18723	1.87357e-05	0.000353097	0.000255734	CCR7/PIM2/BIRC3/CD74/F2R/FASLG/HLA-DRB1	7	BP
GO:0051607	defense response to virus	8/83	265/18723	2.28526e-05	0.000420045	0.000304221	SERINC5/BIRC3/OASL/LYST/APOBEC3C/PTPN22/APOBEC3G/PRF1	8	BP
GO:0140546	defense response to symbiont	8/83	265/18723	2.28526e-05	0.000420045	0.000304221	SERINC5/BIRC3/OASL/LYST/APOBEC3C/PTPN22/APOBEC3G/PRF1	8	BP
GO:0001768	establishment of T cell polarity	3/83	13/18723	2.32678e-05	0.000420045	0.000304221	CCR7/RIPOR2/CRTAM	3	BP
GO:0042492	gamma-delta T cell differentiation	3/83	13/18723	2.32678e-05	0.000420045	0.000304221	LEF1/TCF7/KLRC1	3	BP
GO:0002285	lymphocyte activation involved in immune response	7/83	194/18723	2.45711e-05	0.000438953	0.000317916	LEF1/HAVCR2/CD74/KLRC2/HLA-DRA/ZNF683/HLA-DRB1	7	BP
GO:0022408	negative regulation of cell-cell adhesion	7/83	196/18723	2.62429e-05	0.000463986	0.000336046	RIPOR2/HAVCR2/CD74/CRTAM/PTPN22/LAG3/HLA-DRB1	7	BP
GO:0002705	positive regulation of leukocyte mediated immunity	6/83	134/18723	2.88596e-05	0.000495751	0.000359052	KLRC2/CRTAM/LAG3/HLA-DRA/HLA-DRB1/KLRD1	6	BP
GO:0042098	T cell proliferation	7/83	199/18723	2.89256e-05	0.000495751	0.000359052	HAVCR2/CRTAM/PTPN22/HLA-DPB1/HLA-DPA1/HLA-DRB1/CCL5	7	BP
GO:0001767	establishment of lymphocyte polarity	3/83	14/18723	2.95188e-05	0.000495751	0.000359052	CCR7/RIPOR2/CRTAM	3	BP
GO:0001771	immunological synapse formation	3/83	14/18723	2.95188e-05	0.000495751	0.000359052	CCR7/HAVCR2/PRF1	3	BP
GO:0043922	negative regulation by host of viral transcription	3/83	14/18723	2.95188e-05	0.000495751	0.000359052	CCL3/CCL4/CCL5	3	BP
GO:0002366	leukocyte activation involved in immune response	8/83	275/18723	2.9774e-05	0.000495751	0.000359052	LEF1/HAVCR2/CCL3/CD74/KLRC2/HLA-DRA/ZNF683/HLA-DRB1	8	BP
GO:0002687	positive regulation of leukocyte migration	6/83	135/18723	3.00958e-05	0.000496291	0.000359444	CCR7/RIPOR2/CCL3/CD74/CCL4/CCL5	6	BP
GO:0050671	positive regulation of lymphocyte proliferation	6/83	137/18723	3.2696e-05	0.000533846	0.000386643	HAVCR2/CD74/PTPN22/HLA-DPB1/HLA-DPA1/CCL5	6	BP
GO:0002263	cell activation involved in immune response	8/83	279/18723	3.29957e-05	0.000533846	0.000386643	LEF1/HAVCR2/CCL3/CD74/KLRC2/HLA-DRA/ZNF683/HLA-DRB1	8	BP
GO:0032946	positive regulation of mononuclear cell proliferation	6/83	138/18723	3.40622e-05	0.00054595	0.000395409	HAVCR2/CD74/PTPN22/HLA-DPB1/HLA-DPA1/CCL5	6	BP
GO:0007249	I-kappaB kinase/NF-kappaB signaling	8/83	281/18723	3.4713e-05	0.000551229	0.000399233	CCR7/PIM2/BIRC3/TNIP3/CD74/F2R/FASLG/HLA-DRB1	8	BP
GO:0002709	regulation of T cell mediated immunity	5/83	85/18723	3.76488e-05	0.000592364	0.000429025	IL7R/KLRC1/HLA-DRA/HLA-DRB1/KLRD1	5	BP
GO:0002573	myeloid leukocyte differentiation	7/83	208/18723	3.83624e-05	0.000598105	0.000433183	CCR7/LEF1/MYC/CCL3/CD74/ID2/HLA-DRB1	7	BP
GO:0002429	immune response-activating cell surface receptor signaling pathway	8/83	291/18723	4.44639e-05	0.000675381	0.000489151	CCR7/TXK/HLA-DQB1/KLRC2/PTPN22/HLA-DPB1/HLA-DRB1/KLRD1	8	BP
GO:0002757	immune response-activating signal transduction	8/83	291/18723	4.44639e-05	0.000675381	0.000489151	CCR7/TXK/HLA-DQB1/KLRC2/PTPN22/HLA-DPB1/HLA-DRB1/KLRD1	8	BP
GO:0030101	natural killer cell activation	5/83	88/18723	4.45003e-05	0.000675381	0.000489151	HAVCR2/KLRC2/PTPN22/SLAMF7/ZNF683	5	BP
GO:0002377	immunoglobulin production	7/83	216/18723	4.8749e-05	0.000733373	0.000531152	HLA-DQB1/HLA-DQA1/HLA-DPB1/HLA-DRA/HLA-DPA1/HLA-DRB5/HLA-DRB1	7	BP
GO:1903900	regulation of viral life cycle	6/83	148/18723	5.04158e-05	0.00075167	0.000544404	OASL/CD74/APOBEC3C/HLA-DRB1/APOBEC3G/CCL5	6	BP
GO:2000107	negative regulation of leukocyte apoptotic process	4/83	46/18723	5.08418e-05	0.00075167	0.000544404	IL7R/CCR7/CD74/CCL5	4	BP
GO:0045582	positive regulation of T cell differentiation	5/83	91/18723	5.22794e-05	0.000766317	0.000555013	IL7R/LEF1/CD74/HLA-DRA/HLA-DRB1	5	BP
GO:0070665	positive regulation of leukocyte proliferation	6/83	150/18723	5.43364e-05	0.00078972	0.000571963	HAVCR2/CD74/PTPN22/HLA-DPB1/HLA-DPA1/CCL5	6	BP
GO:0050920	regulation of chemotaxis	7/83	223/18723	5.96331e-05	0.000859418	0.000622442	CCR7/RIPOR2/S1PR1/CCL3/CD74/CCL4/CCL5	7	BP
GO:0045953	negative regulation of natural killer cell mediated cytotoxicity	3/83	18/18723	6.53315e-05	0.000933696	0.000676238	HAVCR2/KLRC1/KLRD1	3	BP
GO:0046631	alpha-beta T cell activation	6/83	156/18723	6.75835e-05	0.000957899	0.000693768	LEF1/CRTAM/PTPN22/HLA-DRA/ZNF683/HLA-DRB1	6	BP
GO:1902107	positive regulation of leukocyte differentiation	6/83	157/18723	7.00224e-05	0.000976328	0.000707115	IL7R/LEF1/CD74/ID2/HLA-DRA/HLA-DRB1	6	BP
GO:1903708	positive regulation of hemopoiesis	6/83	157/18723	7.00224e-05	0.000976328	0.000707115	IL7R/LEF1/CD74/ID2/HLA-DRA/HLA-DRB1	6	BP
GO:0019083	viral transcription	4/83	50/18723	7.07922e-05	0.000979101	0.000709124	LEF1/CCL3/CCL4/CCL5	4	BP
GO:0071622	regulation of granulocyte chemotaxis	4/83	51/18723	7.65589e-05	0.0010443	0.000756346	CCR7/RIPOR2/CD74/CCL5	4	BP
GO:0002716	negative regulation of natural killer cell mediated immunity	3/83	19/18723	7.73331e-05	0.0010443	0.000756346	HAVCR2/KLRC1/KLRD1	3	BP
GO:0140131	positive regulation of lymphocyte chemotaxis	3/83	19/18723	7.73331e-05	0.0010443	0.000756346	CCL3/CCL4/CCL5	3	BP
GO:2000116	regulation of cysteine-type endopeptidase activity	7/83	235/18723	8.28831e-05	0.0011105	0.000804293	BIRC3/MYC/RACK1/F2R/CTSD/FASLG/CST7	7	BP
GO:0042102	positive regulation of T cell proliferation	5/83	101/18723	8.60163e-05	0.00114355	0.000828227	HAVCR2/PTPN22/HLA-DPB1/HLA-DPA1/CCL5	5	BP
GO:0002707	negative regulation of lymphocyte mediated immunity	4/83	53/18723	8.91074e-05	0.00115209	0.000834413	IL7R/HAVCR2/KLRC1/KLRD1	4	BP
GO:0050792	regulation of viral process	6/83	164/18723	8.9131e-05	0.00115209	0.000834413	OASL/CD74/APOBEC3C/HLA-DRB1/APOBEC3G/CCL5	6	BP
GO:1902106	negative regulation of leukocyte differentiation	5/83	102/18723	9.01378e-05	0.00115209	0.000834413	MYC/CCL3/CD74/ID2/LAG3	5	BP
GO:0002834	regulation of response to tumor cell	3/83	20/18723	9.06894e-05	0.00115209	0.000834413	HAVCR2/CRTAM/HLA-DRB1	3	BP
GO:0002837	regulation of immune response to tumor cell	3/83	20/18723	9.06894e-05	0.00115209	0.000834413	HAVCR2/CRTAM/HLA-DRB1	3	BP
GO:0046629	gamma-delta T cell activation	3/83	20/18723	9.06894e-05	0.00115209	0.000834413	LEF1/TCF7/KLRC1	3	BP
GO:0002823	negative regulation of adaptive immune response based on somatic recombination of immune receptors built from immunoglobulin superfamily domains	4/83	54/18723	9.59127e-05	0.00120066	0.000869589	IL7R/HAVCR2/KLRC1/KLRD1	4	BP
GO:0006968	cellular defense response	4/83	54/18723	9.59127e-05	0.00120066	0.000869589	FCMR/KLRC3/KLRC2/PRF1	4	BP
GO:0045621	positive regulation of lymphocyte differentiation	5/83	104/18723	9.88352e-05	0.00121944	0.000883192	IL7R/LEF1/CD74/HLA-DRA/HLA-DRB1	5	BP
GO:0046634	regulation of alpha-beta T cell activation	5/83	104/18723	9.88352e-05	0.00121944	0.000883192	CRTAM/PTPN22/HLA-DRA/ZNF683/HLA-DRB1	5	BP
GO:0002822	regulation of adaptive immune response based on somatic recombination of immune receptors built from immunoglobulin superfamily domains	6/83	168/18723	0.000101785	0.00124687	0.000903055	IL7R/HAVCR2/KLRC1/HLA-DRA/HLA-DRB1/KLRD1	6	BP
GO:0045655	regulation of monocyte differentiation	3/83	21/18723	0.000105466	0.0012828	0.000929078	MYC/CD74/HLA-DRB1	3	BP
GO:0035821	modulation of process of other organism	5/83	106/18723	0.000108164	0.0012882	0.000932991	LEF1/CCL3/PRF1/CCL4/CCL5	5	BP
GO:0071887	leukocyte apoptotic process	5/83	106/18723	0.000108164	0.0012882	0.000932991	IL7R/CCR7/CD74/FASLG/CCL5	5	BP
GO:1903707	negative regulation of hemopoiesis	5/83	106/18723	0.000108164	0.0012882	0.000932991	MYC/CCL3/CD74/ID2/LAG3	5	BP
GO:0045071	negative regulation of viral genome replication	4/83	56/18723	0.000110645	0.00130866	0.000947809	OASL/APOBEC3C/APOBEC3G/CCL5	4	BP
GO:0002763	positive regulation of myeloid leukocyte differentiation	4/83	58/18723	0.000126953	0.00149126	0.00108006	LEF1/CD74/ID2/HLA-DRB1	4	BP
GO:0002820	negative regulation of adaptive immune response	4/83	59/18723	0.000135728	0.0015835	0.00114686	IL7R/HAVCR2/KLRC1/KLRD1	4	BP
GO:0051851	modulation by host of symbiont process	4/83	60/18723	0.000144935	0.00167948	0.00121638	LEF1/CCL3/CCL4/CCL5	4	BP
GO:0002286	T cell activation involved in immune response	5/83	114/18723	0.000152413	0.00175428	0.00127055	LEF1/HAVCR2/CD74/HLA-DRA/HLA-DRB1	5	BP
GO:0043030	regulation of macrophage activation	4/83	61/18723	0.000154585	0.00175572	0.00127159	HAVCR2/CCL3/CD74/CST7	4	BP
GO:2000401	regulation of lymphocyte migration	4/83	61/18723	0.000154585	0.00175572	0.00127159	RIPOR2/CCL3/CCL4/CCL5	4	BP
GO:0071675	regulation of mononuclear cell migration	5/83	115/18723	0.000158791	0.00178187	0.00129054	CCR7/RIPOR2/CCL3/CCL4/CCL5	5	BP
GO:0090023	positive regulation of neutrophil chemotaxis	3/83	24/18723	0.000158966	0.00178187	0.00129054	CCR7/RIPOR2/CD74	3	BP
GO:0002819	regulation of adaptive immune response	6/83	183/18723	0.000162516	0.00180984	0.00131079	IL7R/HAVCR2/KLRC1/HLA-DRA/HLA-DRB1/KLRD1	6	BP
GO:0002704	negative regulation of leukocyte mediated immunity	4/83	63/18723	0.000175266	0.00193924	0.00140451	IL7R/HAVCR2/KLRC1/KLRD1	4	BP
GO:1901623	regulation of lymphocyte chemotaxis	3/83	25/18723	0.000180066	0.00197957	0.00143372	CCL3/CCL4/CCL5	3	BP
GO:0048247	lymphocyte chemotaxis	4/83	64/18723	0.000186323	0.00203532	0.0014741	CCL3/CCL4L1/CCL4/CCL5	4	BP
GO:0071677	positive regulation of mononuclear cell migration	4/83	65/18723	0.000197875	0.00214782	0.00155558	CCR7/CCL3/CCL4/CCL5	4	BP
GO:0002710	negative regulation of T cell mediated immunity	3/83	26/18723	0.000202903	0.00217486	0.00157517	IL7R/KLRC1/KLRD1	3	BP
GO:0019883	antigen processing and presentation of endogenous antigen	3/83	26/18723	0.000202903	0.00217486	0.00157517	CD74/HLA-DRA/HLA-DRB1	3	BP
GO:0072678	T cell migration	4/83	66/18723	0.000209934	0.00223626	0.00161963	RIPOR2/S1PR1/CCL3/CCL5	4	BP
GO:0071624	positive regulation of granulocyte chemotaxis	3/83	27/18723	0.000227537	0.0024088	0.0017446	CCR7/RIPOR2/CD74	3	BP
GO:0045589	regulation of regulatory T cell differentiation	3/83	28/18723	0.000254028	0.00265645	0.00192396	LAG3/HLA-DRA/HLA-DRB1	3	BP
GO:1902624	positive regulation of neutrophil migration	3/83	28/18723	0.000254028	0.00265645	0.00192396	CCR7/RIPOR2/CD74	3	BP
GO:0002548	monocyte chemotaxis	4/83	70/18723	0.000263511	0.00273892	0.00198369	CCL3/CCL4L1/CCL4/CCL5	4	BP
GO:0043280	positive regulation of cysteine-type endopeptidase activity involved in apoptotic process	5/83	129/18723	0.00027132	0.0028031	0.00203017	MYC/RACK1/F2R/CTSD/FASLG	5	BP
GO:0019079	viral genome replication	5/83	131/18723	0.000291351	0.00299202	0.002167	OASL/APOBEC3C/CXCR6/APOBEC3G/CCL5	5	BP
GO:0070227	lymphocyte apoptotic process	4/83	72/18723	0.00029369	0.00299808	0.00217139	IL7R/CD74/FASLG/CCL5	4	BP
GO:0070229	negative regulation of lymphocyte apoptotic process	3/83	30/18723	0.000312815	0.00317443	0.00229911	IL7R/CD74/CCL5	3	BP
GO:0043281	regulation of cysteine-type endopeptidase activity involved in apoptotic process	6/83	209/18723	0.000332617	0.00335552	0.00243027	BIRC3/MYC/RACK1/F2R/CTSD/FASLG	6	BP
GO:0002685	regulation of leukocyte migration	6/83	210/18723	0.000341201	0.00340209	0.002464	CCR7/RIPOR2/CCL3/CD74/CCL4/CCL5	6	BP
GO:0045637	regulation of myeloid cell differentiation	6/83	210/18723	0.000341201	0.00340209	0.002464	LEF1/MYC/CCL3/CD74/ID2/HLA-DRB1	6	BP
GO:0045066	regulatory T cell differentiation	3/83	31/18723	0.000345226	0.00342233	0.00247865	LAG3/HLA-DRA/HLA-DRB1	3	BP
GO:0090022	regulation of neutrophil chemotaxis	3/83	32/18723	0.000379724	0.00374268	0.00271068	CCR7/RIPOR2/CD74	3	BP
GO:0032633	interleukin-4 production	3/83	33/18723	0.000416365	0.00403427	0.00292186	LEF1/HAVCR2/HLA-DRB1	3	BP
GO:0032673	regulation of interleukin-4 production	3/83	33/18723	0.000416365	0.00403427	0.00292186	LEF1/HAVCR2/HLA-DRB1	3	BP
GO:0071353	cellular response to interleukin-4	3/83	33/18723	0.000416365	0.00403427	0.00292186	LEF1/TCF7/RPLP0	3	BP
GO:0051817	modulation of process of other organism involved in symbiotic interaction	4/83	81/18723	0.000460813	0.00441506	0.00319765	LEF1/CCL3/CCL4/CCL5	4	BP
GO:2000106	regulation of leukocyte apoptotic process	4/83	81/18723	0.000460813	0.00441506	0.00319765	IL7R/CCR7/CD74/CCL5	4	BP
GO:2000403	positive regulation of lymphocyte migration	3/83	35/18723	0.00049629	0.00472854	0.00342469	CCL3/CCL4/CCL5	3	BP
GO:2001056	positive regulation of cysteine-type endopeptidase activity	5/83	148/18723	0.000510253	0.00483471	0.00350159	MYC/RACK1/F2R/CTSD/FASLG	5	BP
GO:0030224	monocyte differentiation	3/83	36/18723	0.000539682	0.00505767	0.00366307	MYC/CD74/HLA-DRB1	3	BP
GO:0070670	response to interleukin-4	3/83	36/18723	0.000539682	0.00505767	0.00366307	LEF1/TCF7/RPLP0	3	BP
GO:0045069	regulation of viral genome replication	4/83	85/18723	0.000553338	0.00515747	0.00373535	OASL/APOBEC3C/APOBEC3G/CCL5	4	BP
GO:0050851	antigen receptor-mediated signaling pathway	6/83	240/18723	0.000690599	0.00640204	0.00463674	CCR7/TXK/HLA-DQB1/PTPN22/HLA-DPB1/HLA-DRB1	6	BP
GO:0048525	negative regulation of viral process	4/83	92/18723	0.00074588	0.00687734	0.00498098	OASL/APOBEC3C/APOBEC3G/CCL5	4	BP
GO:1902622	regulation of neutrophil migration	3/83	41/18723	0.000792991	0.00727262	0.00526727	CCR7/RIPOR2/CD74	3	BP
GO:0019080	viral gene expression	4/83	94/18723	0.000808605	0.00733735	0.00531414	LEF1/CCL3/CCL4/CCL5	4	BP
GO:0051702	biological process involved in interaction with symbiont	4/83	94/18723	0.000808605	0.00733735	0.00531414	LEF1/CCL3/CCL4/CCL5	4	BP
GO:0070383	DNA cytosine deamination	2/83	10/18723	0.000853792	0.00770659	0.00558158	APOBEC3C/APOBEC3G	2	BP
GO:0042088	T-helper 1 type immune response	3/83	43/18723	0.000912204	0.00819073	0.00593222	LEF1/HAVCR2/HLA-DRB1	3	BP
GO:0031348	negative regulation of defense response	6/83	258/18723	0.00100512	0.00892247	0.00646218	HAVCR2/KLRC1/HLA-DRB1/CST7/AOAH/KLRD1	6	BP
GO:0002221	pattern recognition receptor signaling pathway	5/83	172/18723	0.00100549	0.00892247	0.00646218	BIRC3/OASL/TNIP3/HAVCR2/PTPN22	5	BP
GO:0002357	defense response to tumor cell	2/83	11/18723	0.00104052	0.00892247	0.00646218	ABI3/PRF1	2	BP
GO:0002604	regulation of dendritic cell antigen processing and presentation	2/83	11/18723	0.00104052	0.00892247	0.00646218	CCR7/CD74	2	BP
GO:0045060	negative thymic T cell selection	2/83	11/18723	0.00104052	0.00892247	0.00646218	CCR7/CD74	2	BP
GO:0045657	positive regulation of monocyte differentiation	2/83	11/18723	0.00104052	0.00892247	0.00646218	CD74/HLA-DRB1	2	BP
GO:0046598	positive regulation of viral entry into host cell	2/83	11/18723	0.00104052	0.00892247	0.00646218	CD74/HLA-DRB1	2	BP
GO:0046643	regulation of gamma-delta T cell activation	2/83	11/18723	0.00104052	0.00892247	0.00646218	LEF1/TCF7	2	BP
GO:0075294	positive regulation by symbiont of entry into host	2/83	11/18723	0.00104052	0.00892247	0.00646218	CD74/HLA-DRB1	2	BP
GO:0045639	positive regulation of myeloid cell differentiation	4/83	103/18723	0.00113753	0.00970583	0.00702954	LEF1/CD74/ID2/HLA-DRB1	4	BP
GO:0048661	positive regulation of smooth muscle cell proliferation	4/83	104/18723	0.00117908	0.0100105	0.00725022	S1PR1/LDLRAP1/ID2/CCL5	4	BP
GO:0010950	positive regulation of endopeptidase activity	5/83	179/18723	0.00120099	0.0101463	0.00734855	MYC/RACK1/F2R/CTSD/FASLG	5	BP
GO:0006216	cytidine catabolic process	2/83	12/18723	0.00124503	0.0101678	0.00736411	APOBEC3C/APOBEC3G	2	BP
GO:0009972	cytidine deamination	2/83	12/18723	0.00124503	0.0101678	0.00736411	APOBEC3C/APOBEC3G	2	BP
GO:0016554	cytidine to uridine editing	2/83	12/18723	0.00124503	0.0101678	0.00736411	APOBEC3C/APOBEC3G	2	BP
GO:0034154	toll-like receptor 7 signaling pathway	2/83	12/18723	0.00124503	0.0101678	0.00736411	HAVCR2/PTPN22	2	BP
GO:0043380	regulation of memory T cell differentiation	2/83	12/18723	0.00124503	0.0101678	0.00736411	HLA-DRA/HLA-DRB1	2	BP
GO:0043383	negative T cell selection	2/83	12/18723	0.00124503	0.0101678	0.00736411	CCR7/CD74	2	BP
GO:0046087	cytidine metabolic process	2/83	12/18723	0.00124503	0.0101678	0.00736411	APOBEC3C/APOBEC3G	2	BP
GO:0042116	macrophage activation	4/83	106/18723	0.00126535	0.0102847	0.00744881	HAVCR2/CCL3/CD74/CST7	4	BP
GO:0007229	integrin-mediated signaling pathway	4/83	107/18723	0.0013101	0.0105982	0.00767585	TXK/CD63/ITGAE/ITGA1	4	BP
GO:1904894	positive regulation of receptor signaling pathway via STAT	3/83	49/18723	0.00133605	0.0107574	0.00779115	IL7R/F2R/CCL5	3	BP
GO:0070231	T cell apoptotic process	3/83	50/18723	0.00141681	0.0113544	0.0082235	IL7R/FASLG/CCL5	3	BP
GO:0002698	negative regulation of immune effector process	4/83	110/18723	0.00145097	0.0115741	0.00838262	IL7R/HAVCR2/KLRC1/KLRD1	4	BP
GO:0043379	memory T cell differentiation	2/83	13/18723	0.00146717	0.0115954	0.00839808	HLA-DRA/HLA-DRB1	2	BP
GO:0070424	regulation of nucleotide-binding oligomerization domain containing signaling pathway	2/83	13/18723	0.00146717	0.0115954	0.00839808	BIRC3/PTPN22	2	BP
GO:0046632	alpha-beta T cell differentiation	4/83	112/18723	0.00155056	0.0121982	0.00883467	LEF1/HLA-DRA/ZNF683/HLA-DRB1	4	BP
GO:0071347	cellular response to interleukin-1	4/83	113/18723	0.00160209	0.0125461	0.00908662	CCL3/CCL4L1/CCL4/CCL5	4	BP
GO:0045006	DNA deamination	2/83	14/18723	0.00170678	0.0130577	0.00945714	APOBEC3C/APOBEC3G	2	BP
GO:0046131	pyrimidine ribonucleoside metabolic process	2/83	14/18723	0.00170678	0.0130577	0.00945714	APOBEC3C/APOBEC3G	2	BP
GO:0046133	pyrimidine ribonucleoside catabolic process	2/83	14/18723	0.00170678	0.0130577	0.00945714	APOBEC3C/APOBEC3G	2	BP
GO:0090715	immunological memory formation process	2/83	14/18723	0.00170678	0.0130577	0.00945714	HLA-DRA/HLA-DRB1	2	BP
GO:0051209	release of sequestered calcium ion into cytosol	4/83	115/18723	0.00170872	0.0130577	0.00945714	CCR7/CCL3/F2R/FASLG	4	BP
GO:0050777	negative regulation of immune response	5/83	194/18723	0.00171311	0.0130577	0.00945714	IL7R/HAVCR2/KLRC1/HLA-DRB1/KLRD1	5	BP
GO:0051283	negative regulation of sequestering of calcium ion	4/83	116/18723	0.00176384	0.0133748	0.00968682	CCR7/CCL3/F2R/FASLG	4	BP
GO:0070228	regulation of lymphocyte apoptotic process	3/83	54/18723	0.00177031	0.0133748	0.00968682	IL7R/CD74/CCL5	3	BP
GO:0044403	biological process involved in symbiotic interaction	6/83	290/18723	0.0018243	0.0137216	0.00993797	LEF1/CCL3/CD74/HLA-DRB1/CCL4/CCL5	6	BP
GO:0010952	positive regulation of peptidase activity	5/83	197/18723	0.00183221	0.0137216	0.00993797	MYC/RACK1/F2R/CTSD/FASLG	5	BP
GO:0006414	translational elongation	3/83	55/18723	0.00186649	0.0138573	0.0100363	EEF1G/EEF2/RACK1	3	BP
GO:0045620	negative regulation of lymphocyte differentiation	3/83	55/18723	0.00186649	0.0138573	0.0100363	CD74/ID2/LAG3	3	BP
GO:0051282	regulation of sequestering of calcium ion	4/83	118/18723	0.00187776	0.0138809	0.0100534	CCR7/CCL3/F2R/FASLG	4	BP
GO:0002836	positive regulation of response to tumor cell	2/83	15/18723	0.00196371	0.0143921	0.0104236	CRTAM/HLA-DRB1	2	BP
GO:0002839	positive regulation of immune response to tumor cell	2/83	15/18723	0.00196371	0.0143921	0.0104236	CRTAM/HLA-DRB1	2	BP
GO:0002224	toll-like receptor signaling pathway	4/83	121/18723	0.00205807	0.0150195	0.010878	BIRC3/TNIP3/HAVCR2/PTPN22	4	BP
GO:0051208	sequestering of calcium ion	4/83	122/18723	0.00212073	0.0153462	0.0111147	CCR7/CCL3/F2R/FASLG	4	BP
GO:0051928	positive regulation of calcium ion transport	4/83	122/18723	0.00212073	0.0153462	0.0111147	CCL3/F2R/CCL4/CCL5	4	BP
GO:0043525	positive regulation of neuron apoptotic process	3/83	58/18723	0.00217441	0.0156686	0.0113481	CCL3/FASLG/ITGA1	3	BP
GO:0034138	toll-like receptor 3 signaling pathway	2/83	16/18723	0.00223779	0.0159245	0.0115335	HAVCR2/PTPN22	2	BP
GO:0045869	negative regulation of single stranded viral RNA replication via double stranded DNA intermediate	2/83	16/18723	0.00223779	0.0159245	0.0115335	APOBEC3C/APOBEC3G	2	BP
GO:0046135	pyrimidine nucleoside catabolic process	2/83	16/18723	0.00223779	0.0159245	0.0115335	APOBEC3C/APOBEC3G	2	BP
GO:0071222	cellular response to lipopolysaccharide	5/83	209/18723	0.00237005	0.016796	0.0121647	TNIP3/HAVCR2/CCL3/PTPN22/CCL5	5	BP
GO:0002753	cytoplasmic pattern recognition receptor signaling pathway	3/83	60/18723	0.00239619	0.0168421	0.012198	BIRC3/OASL/PTPN22	3	BP
GO:0031663	lipopolysaccharide-mediated signaling pathway	3/83	60/18723	0.00239619	0.0168421	0.012198	CCL3/PTPN22/CCL5	3	BP
GO:0043491	protein kinase B signaling	5/83	211/18723	0.00246976	0.017279	0.0125145	CCR7/THEM4/RACK1/CCL3/CCL5	5	BP
GO:0032612	interleukin-1 production	4/83	128/18723	0.00252468	0.017279	0.0125145	CCR7/HAVCR2/CCL3/F2R	4	BP
GO:0032652	regulation of interleukin-1 production	4/83	128/18723	0.00252468	0.017279	0.0125145	CCR7/HAVCR2/CCL3/F2R	4	BP
GO:0033151	V(D)J recombination	2/83	17/18723	0.00252888	0.017279	0.0125145	LEF1/TCF7	2	BP
GO:0045591	positive regulation of regulatory T cell differentiation	2/83	17/18723	0.00252888	0.017279	0.0125145	HLA-DRA/HLA-DRB1	2	BP
GO:0070206	protein trimerization	2/83	17/18723	0.00252888	0.017279	0.0125145	CD74/ALOX5AP	2	BP
GO:0090713	immunological memory process	2/83	17/18723	0.00252888	0.017279	0.0125145	HLA-DRA/HLA-DRB1	2	BP
GO:0070265	necrotic cell death	3/83	62/18723	0.0026315	0.0179088	0.0129706	BIRC3/TMEM123/FASLG	3	BP
GO:0002223	stimulatory C-type lectin receptor signaling pathway	2/83	18/18723	0.00283682	0.0189711	0.01374	KLRC2/KLRD1	2	BP
GO:0034162	toll-like receptor 9 signaling pathway	2/83	18/18723	0.00283682	0.0189711	0.01374	HAVCR2/PTPN22	2	BP
GO:1990840	response to lectin	2/83	18/18723	0.00283682	0.0189711	0.01374	KLRC2/KLRD1	2	BP
GO:1990858	cellular response to lectin	2/83	18/18723	0.00283682	0.0189711	0.01374	KLRC2/KLRD1	2	BP
GO:0007163	establishment or maintenance of cell polarity	5/83	218/18723	0.0028429	0.0189711	0.01374	CCR7/RIPOR2/RACK1/CRTAM/CCL4	5	BP
GO:0048524	positive regulation of viral process	3/83	65/18723	0.00301041	0.0199622	0.0144578	CD74/HLA-DRB1/CCL5	3	BP
GO:0071219	cellular response to molecule of bacterial origin	5/83	221/18723	0.0030147	0.0199622	0.0144578	TNIP3/HAVCR2/CCL3/PTPN22/CCL5	5	BP
GO:0002274	myeloid leukocyte activation	5/83	223/18723	0.00313333	0.0203068	0.0147074	HAVCR2/CCL3/CD74/CST7/CCL5	5	BP
GO:0042093	T-helper cell differentiation	3/83	66/18723	0.00314377	0.0203068	0.0147074	LEF1/HLA-DRA/HLA-DRB1	3	BP
GO:0050918	positive chemotaxis	3/83	66/18723	0.00314377	0.0203068	0.0147074	S1PR1/CCL3/CCL5	3	BP
GO:0002483	antigen processing and presentation of endogenous peptide antigen	2/83	19/18723	0.00316147	0.0203068	0.0147074	HLA-DRA/HLA-DRB1	2	BP
GO:0045091	regulation of single stranded viral RNA replication via double stranded DNA intermediate	2/83	19/18723	0.00316147	0.0203068	0.0147074	APOBEC3C/APOBEC3G	2	BP
GO:0070233	negative regulation of T cell apoptotic process	2/83	19/18723	0.00316147	0.0203068	0.0147074	IL7R/CCL5	2	BP
GO:1903978	regulation of microglial cell activation	2/83	19/18723	0.00316147	0.0203068	0.0147074	CCL3/CST7	2	BP
GO:2001185	regulation of CD8-positive, alpha-beta T cell activation	2/83	19/18723	0.00316147	0.0203068	0.0147074	CRTAM/PTPN22	2	BP
GO:0042130	negative regulation of T cell proliferation	3/83	67/18723	0.0032807	0.020916	0.0151486	HAVCR2/CRTAM/HLA-DRB1	3	BP
GO:0046635	positive regulation of alpha-beta T cell activation	3/83	67/18723	0.0032807	0.020916	0.0151486	PTPN22/HLA-DRA/HLA-DRB1	3	BP
GO:0002294	CD4-positive, alpha-beta T cell differentiation involved in immune response	3/83	68/18723	0.00342124	0.0215714	0.0156233	LEF1/HLA-DRA/HLA-DRB1	3	BP
GO:0009988	cell-cell recognition	3/83	68/18723	0.00342124	0.0215714	0.0156233	CCR7/HAVCR2/PRF1	3	BP
GO:0046637	regulation of alpha-beta T cell differentiation	3/83	68/18723	0.00342124	0.0215714	0.0156233	HLA-DRA/ZNF683/HLA-DRB1	3	BP
GO:0002577	regulation of antigen processing and presentation	2/83	20/18723	0.00350267	0.0217282	0.0157369	CCR7/CD74	2	BP
GO:0016553	base conversion or substitution editing	2/83	20/18723	0.00350267	0.0217282	0.0157369	APOBEC3C/APOBEC3G	2	BP
GO:0039535	regulation of RIG-I signaling pathway	2/83	20/18723	0.00350267	0.0217282	0.0157369	BIRC3/OASL	2	BP
GO:0039692	single stranded viral RNA replication via double stranded DNA intermediate	2/83	20/18723	0.00350267	0.0217282	0.0157369	APOBEC3C/APOBEC3G	2	BP
GO:0071356	cellular response to tumor necrosis factor	5/83	229/18723	0.00350946	0.0217282	0.0157369	BIRC3/CCL3/CCL4L1/CCL4/CCL5	5	BP
GO:0002287	alpha-beta T cell activation involved in immune response	3/83	69/18723	0.00356542	0.0219165	0.0158732	LEF1/HLA-DRA/HLA-DRB1	3	BP
GO:0002293	alpha-beta T cell differentiation involved in immune response	3/83	69/18723	0.00356542	0.0219165	0.0158732	LEF1/HLA-DRA/HLA-DRB1	3	BP
GO:0097553	calcium ion transmembrane import into cytosol	4/83	142/18723	0.00366676	0.0224589	0.0162661	CCR7/CCL3/F2R/FASLG	4	BP
GO:0045123	cellular extravasation	3/83	70/18723	0.00371327	0.0226628	0.0164138	SELL/RIPOR2/ITGA1	3	BP
GO:0030010	establishment of cell polarity	4/83	143/18723	0.00375973	0.0227842	0.0165017	CCR7/RIPOR2/RACK1/CRTAM	4	BP
GO:0070555	response to interleukin-1	4/83	143/18723	0.00375973	0.0227842	0.0165017	CCL3/CCL4L1/CCL4/CCL5	4	BP
GO:0042454	ribonucleoside catabolic process	2/83	21/18723	0.00386027	0.0231754	0.016785	APOBEC3C/APOBEC3G	2	BP
GO:0070269	pyroptosis	2/83	21/18723	0.00386027	0.0231754	0.016785	GZMB/GZMA	2	BP
GO:0045824	negative regulation of innate immune response	3/83	71/18723	0.00386481	0.0231754	0.016785	HAVCR2/KLRC1/KLRD1	3	BP
GO:0002220	innate immune response activating cell surface receptor signaling pathway	2/83	22/18723	0.00423412	0.0250397	0.0181352	KLRC2/KLRD1	2	BP
GO:0032069	regulation of nuclease activity	2/83	22/18723	0.00423412	0.0250397	0.0181352	OASL/GZMA	2	BP
GO:0045061	thymic T cell selection	2/83	22/18723	0.00423412	0.0250397	0.0181352	CCR7/CD74	2	BP
GO:2000114	regulation of establishment of cell polarity	2/83	22/18723	0.00423412	0.0250397	0.0181352	RIPOR2/RACK1	2	BP
GO:0002292	T cell differentiation involved in immune response	3/83	75/18723	0.00450849	0.0264797	0.0191781	LEF1/HLA-DRA/HLA-DRB1	3	BP
GO:0033077	T cell differentiation in thymus	3/83	75/18723	0.00450849	0.0264797	0.0191781	IL7R/CCR7/CD74	3	BP
GO:0002758	innate immune response-activating signal transduction	2/83	23/18723	0.00462408	0.0270659	0.0196027	KLRC2/KLRD1	2	BP
GO:0071216	cellular response to biotic stimulus	5/83	246/18723	0.00475083	0.0277132	0.0200715	TNIP3/HAVCR2/CCL3/PTPN22/CCL5	5	BP
GO:0006213	pyrimidine nucleoside metabolic process	2/83	24/18723	0.00503	0.0290532	0.0210421	APOBEC3C/APOBEC3G	2	BP
GO:0039531	regulation of viral-induced cytoplasmic pattern recognition receptor signaling pathway	2/83	24/18723	0.00503	0.0290532	0.0210421	BIRC3/OASL	2	BP
GO:0006919	activation of cysteine-type endopeptidase activity involved in apoptotic process	3/83	78/18723	0.00503137	0.0290532	0.0210421	RACK1/F2R/FASLG	3	BP
GO:0034612	response to tumor necrosis factor	5/83	253/18723	0.00534299	0.0307491	0.0222703	BIRC3/CCL3/CCL4L1/CCL4/CCL5	5	BP
GO:0032272	negative regulation of protein polymerization	3/83	80/18723	0.00539944	0.03097	0.0224303	ADD3/CAPG/TBCD	3	BP
GO:0032878	regulation of establishment or maintenance of cell polarity	2/83	25/18723	0.00545173	0.0310622	0.0224971	RIPOR2/RACK1	2	BP
GO:0070423	nucleotide-binding oligomerization domain containing signaling pathway	2/83	25/18723	0.00545173	0.0310622	0.0224971	BIRC3/PTPN22	2	BP
GO:0060402	calcium ion transport into cytosol	4/83	160/18723	0.00559347	0.0317642	0.0230056	CCR7/CCL3/F2R/FASLG	4	BP
GO:0002407	dendritic cell chemotaxis	2/83	26/18723	0.00588913	0.0328986	0.0238271	CCR7/CCL5	2	BP
GO:0009164	nucleoside catabolic process	2/83	26/18723	0.00588913	0.0328986	0.0238271	APOBEC3C/APOBEC3G	2	BP
GO:0035872	nucleotide-binding domain, leucine rich repeat containing receptor signaling pathway	2/83	26/18723	0.00588913	0.0328986	0.0238271	BIRC3/PTPN22	2	BP
GO:0051016	barbed-end actin filament capping	2/83	26/18723	0.00588913	0.0328986	0.0238271	ADD3/CAPG	2	BP
GO:1905523	positive regulation of macrophage migration	2/83	26/18723	0.00588913	0.0328986	0.0238271	CCL3/CCL5	2	BP
GO:0051494	negative regulation of cytoskeleton organization	4/83	163/18723	0.00596931	0.0330896	0.0239655	S1PR1/ADD3/CAPG/TBCD	4	BP
GO:0043367	CD4-positive, alpha-beta T cell differentiation	3/83	83/18723	0.00598122	0.0330896	0.0239655	LEF1/HLA-DRA/HLA-DRB1	3	BP
GO:0050672	negative regulation of lymphocyte proliferation	3/83	83/18723	0.00598122	0.0330896	0.0239655	HAVCR2/CRTAM/HLA-DRB1	3	BP
GO:0032945	negative regulation of mononuclear cell proliferation	3/83	84/18723	0.00618315	0.0339875	0.0246158	HAVCR2/CRTAM/HLA-DRB1	3	BP
GO:0098586	cellular response to virus	3/83	84/18723	0.00618315	0.0339875	0.0246158	BIRC3/OASL/CCL5	3	BP
GO:0032635	interleukin-6 production	4/83	165/18723	0.00622901	0.0340215	0.0246404	HAVCR2/CD74/F2R/PTPN22	4	BP
GO:0032675	regulation of interleukin-6 production	4/83	165/18723	0.00622901	0.0340215	0.0246404	HAVCR2/CD74/F2R/PTPN22	4	BP
GO:0010528	regulation of transposition	2/83	27/18723	0.00634206	0.034096	0.0246944	APOBEC3C/APOBEC3G	2	BP
GO:0010529	negative regulation of transposition	2/83	27/18723	0.00634206	0.034096	0.0246944	APOBEC3C/APOBEC3G	2	BP
GO:0032703	negative regulation of interleukin-2 production	2/83	27/18723	0.00634206	0.034096	0.0246944	HAVCR2/LAG3	2	BP
GO:0036037	CD8-positive, alpha-beta T cell activation	2/83	27/18723	0.00634206	0.034096	0.0246944	CRTAM/PTPN22	2	BP
GO:0039529	RIG-I signaling pathway	2/83	27/18723	0.00634206	0.034096	0.0246944	BIRC3/OASL	2	BP
GO:1902904	negative regulation of supramolecular fiber organization	4/83	167/18723	0.00649612	0.0348152	0.0252152	S1PR1/ADD3/CAPG/TBCD	4	BP
GO:0002675	positive regulation of acute inflammatory response	2/83	28/18723	0.00681037	0.0360487	0.0261086	CCR7/ALOX5AP	2	BP
GO:0007205	protein kinase C-activating G protein-coupled receptor signaling pathway	2/83	28/18723	0.00681037	0.0360487	0.0261086	DGKA/F2R	2	BP
GO:0010818	T cell chemotaxis	2/83	28/18723	0.00681037	0.0360487	0.0261086	CCL3/CCL5	2	BP
GO:0080111	DNA demethylation	2/83	28/18723	0.00681037	0.0360487	0.0261086	APOBEC3C/APOBEC3G	2	BP
GO:0048872	homeostasis of number of cells	5/83	272/18723	0.00721146	0.0380543	0.0275612	IL7R/CCR7/CD74/F2R/ID2	5	BP
GO:0001916	positive regulation of T cell mediated cytotoxicity	2/83	29/18723	0.00729392	0.0382541	0.0277059	HLA-DRA/HLA-DRB1	2	BP
GO:1903902	positive regulation of viral life cycle	2/83	29/18723	0.00729392	0.0382541	0.0277059	CD74/HLA-DRB1	2	BP
GO:0070664	negative regulation of leukocyte proliferation	3/83	90/18723	0.00748022	0.0391115	0.0283269	HAVCR2/CRTAM/HLA-DRB1	3	BP
GO:1905475	regulation of protein localization to membrane	4/83	175/18723	0.00764056	0.0398284	0.0288461	LDLRAP1/RACK1/ABI3/GZMB	4	BP
GO:0043032	positive regulation of macrophage activation	2/83	30/18723	0.00779257	0.0403754	0.0292423	HAVCR2/CCL3	2	BP
GO:0051491	positive regulation of filopodium assembly	2/83	30/18723	0.00779257	0.0403754	0.0292423	CCR7/RIPOR2	2	BP
GO:0002230	positive regulation of defense response to virus by host	2/83	31/18723	0.00830618	0.0425227	0.0307975	PTPN22/APOBEC3G	2	BP
GO:0002323	natural killer cell activation involved in immune response	2/83	31/18723	0.00830618	0.0425227	0.0307975	KLRC2/ZNF683	2	BP
GO:0034656	nucleobase-containing small molecule catabolic process	2/83	31/18723	0.00830618	0.0425227	0.0307975	APOBEC3C/APOBEC3G	2	BP
GO:0035510	DNA dealkylation	2/83	31/18723	0.00830618	0.0425227	0.0307975	APOBEC3C/APOBEC3G	2	BP
GO:0048660	regulation of smooth muscle cell proliferation	4/83	180/18723	0.0084193	0.0429735	0.031124	S1PR1/LDLRAP1/ID2/CCL5	4	BP
GO:0060401	cytosolic calcium ion transport	4/83	182/18723	0.00874483	0.0445026	0.0322315	CCR7/CCL3/F2R/FASLG	4	BP
GO:0032196	transposition	2/83	32/18723	0.00883461	0.0445628	0.0322751	APOBEC3C/APOBEC3G	2	BP
GO:0043372	positive regulation of CD4-positive, alpha-beta T cell differentiation	2/83	32/18723	0.00883461	0.0445628	0.0322751	HLA-DRA/HLA-DRB1	2	BP
GO:0050850	positive regulation of calcium-mediated signaling	2/83	32/18723	0.00883461	0.0445628	0.0322751	CCL3/CCL4	2	BP
GO:0048659	smooth muscle cell proliferation	4/83	184/18723	0.00907851	0.0456588	0.0330688	S1PR1/LDLRAP1/ID2/CCL5	4	BP
GO:1901216	positive regulation of neuron death	3/83	97/18723	0.00918258	0.0460472	0.0333501	CCL3/FASLG/ITGA1	3	BP
GO:0036336	dendritic cell migration	2/83	33/18723	0.00937773	0.0468886	0.0339595	CCR7/CCL5	2	BP
GO:0043473	pigmentation	3/83	98/18723	0.00944272	0.0470763	0.0340955	RACK1/LYST/CD63	3	BP
GO:0042100	B cell proliferation	3/83	99/18723	0.00970713	0.0482543	0.0349486	IL7R/LEF1/CD74	3	BP
GO:0039528	cytoplasmic pattern recognition receptor signaling pathway in response to virus	2/83	34/18723	0.00993539	0.0489632	0.0354621	BIRC3/OASL	2	BP
GO:0051482	positive regulation of cytosolic calcium ion concentration involved in phospholipase C-activating G protein-coupled signaling pathway	2/83	34/18723	0.00993539	0.0489632	0.0354621	S1PR1/F2R	2	BP
GO:0070232	regulation of T cell apoptotic process	2/83	34/18723	0.00993539	0.0489632	0.0354621	IL7R/CCL5	2	BP
GO:0044728	DNA methylation or demethylation	3/83	100/18723	0.00997583	0.0490216	0.0355044	MYC/APOBEC3C/APOBEC3G	3	BP
GO:0042613	MHC class II protein complex	8/85	17/19550	2.14489e-15	2.53098e-13	1.80623e-13	HLA-DQB1/CD74/HLA-DQA1/HLA-DPB1/HLA-DRA/HLA-DPA1/HLA-DRB5/HLA-DRB1	8	CC
GO:0042611	MHC protein complex	8/85	25/19550	9.2787e-14	5.47443e-12	3.90682e-12	HLA-DQB1/CD74/HLA-DQA1/HLA-DPB1/HLA-DRA/HLA-DPA1/HLA-DRB5/HLA-DRB1	8	CC
GO:0071556	integral component of lumenal side of endoplasmic reticulum membrane	8/85	29/19550	3.63086e-13	1.0711e-11	7.64392e-12	HLA-DQB1/CD74/HLA-DQA1/HLA-DPB1/HLA-DRA/HLA-DPA1/HLA-DRB5/HLA-DRB1	8	CC
GO:0098553	lumenal side of endoplasmic reticulum membrane	8/85	29/19550	3.63086e-13	1.0711e-11	7.64392e-12	HLA-DQB1/CD74/HLA-DQA1/HLA-DPB1/HLA-DRA/HLA-DPA1/HLA-DRB5/HLA-DRB1	8	CC
GO:0030669	clathrin-coated endocytic vesicle membrane	10/85	72/19550	6.02408e-13	1.42168e-11	1.01458e-11	IL7R/LDLRAP1/HLA-DQB1/CD74/HLA-DQA1/HLA-DPB1/HLA-DRA/HLA-DPA1/HLA-DRB5/HLA-DRB1	10	CC
GO:0098576	lumenal side of membrane	8/85	36/19550	2.49771e-12	4.91217e-11	3.50556e-11	HLA-DQB1/CD74/HLA-DQA1/HLA-DPB1/HLA-DRA/HLA-DPA1/HLA-DRB5/HLA-DRB1	8	CC
GO:0045334	clathrin-coated endocytic vesicle	10/85	91/19550	6.75581e-12	1.13884e-10	8.12729e-11	IL7R/LDLRAP1/HLA-DQB1/CD74/HLA-DQA1/HLA-DPB1/HLA-DRA/HLA-DPA1/HLA-DRB5/HLA-DRB1	10	CC
GO:0030665	clathrin-coated vesicle membrane	10/85	116/19550	7.85613e-11	1.15878e-09	8.26961e-10	IL7R/LDLRAP1/HLA-DQB1/CD74/HLA-DQA1/HLA-DPB1/HLA-DRA/HLA-DPA1/HLA-DRB5/HLA-DRB1	10	CC
GO:0012507	ER to Golgi transport vesicle membrane	8/85	62/19550	2.54745e-10	3.34e-09	2.38358e-09	HLA-DQB1/CD74/HLA-DQA1/HLA-DPB1/HLA-DRA/HLA-DPA1/HLA-DRB5/HLA-DRB1	8	CC
GO:0030662	coated vesicle membrane	10/85	181/19550	6.19264e-09	7.30732e-08	5.21485e-08	IL7R/LDLRAP1/HLA-DQB1/CD74/HLA-DQA1/HLA-DPB1/HLA-DRA/HLA-DPA1/HLA-DRB5/HLA-DRB1	10	CC
GO:0030134	COPII-coated ER to Golgi transport vesicle	8/85	94/19550	7.49616e-09	8.04134e-08	5.73869e-08	HLA-DQB1/CD74/HLA-DQA1/HLA-DPB1/HLA-DRA/HLA-DPA1/HLA-DRB5/HLA-DRB1	8	CC
GO:0030666	endocytic vesicle membrane	10/85	193/19550	1.14642e-08	1.11378e-07	7.94846e-08	IL7R/LDLRAP1/HLA-DQB1/CD74/HLA-DQA1/HLA-DPB1/HLA-DRA/HLA-DPA1/HLA-DRB5/HLA-DRB1	10	CC
GO:0032588	trans-Golgi network membrane	8/85	100/19550	1.22704e-08	1.11378e-07	7.94846e-08	HLA-DQB1/CD74/HLA-DQA1/HLA-DPB1/HLA-DRA/HLA-DPA1/HLA-DRB5/HLA-DRB1	8	CC
GO:0030136	clathrin-coated vesicle	10/85	196/19550	1.32852e-08	1.11975e-07	7.99108e-08	IL7R/LDLRAP1/HLA-DQB1/CD74/HLA-DQA1/HLA-DPB1/HLA-DRA/HLA-DPA1/HLA-DRB5/HLA-DRB1	10	CC
GO:0001772	immunological synapse	6/85	44/19550	3.49234e-08	2.74731e-07	1.96061e-07	HAVCR2/CRTAM/HLA-DRA/HLA-DRB1/GZMB/GZMA	6	CC
GO:0030176	integral component of endoplasmic reticulum membrane	8/85	162/19550	5.23623e-07	3.86172e-06	2.75591e-06	HLA-DQB1/CD74/HLA-DQA1/HLA-DPB1/HLA-DRA/HLA-DPA1/HLA-DRB5/HLA-DRB1	8	CC
GO:0030135	coated vesicle	10/85	299/19550	6.85299e-07	4.75678e-06	3.39467e-06	IL7R/LDLRAP1/HLA-DQB1/CD74/HLA-DQA1/HLA-DPB1/HLA-DRA/HLA-DPA1/HLA-DRB5/HLA-DRB1	10	CC
GO:0031227	intrinsic component of endoplasmic reticulum membrane	8/85	170/19550	7.54994e-07	4.94941e-06	3.53214e-06	HLA-DQB1/CD74/HLA-DQA1/HLA-DPB1/HLA-DRA/HLA-DPA1/HLA-DRB5/HLA-DRB1	8	CC
GO:0030658	transport vesicle membrane	8/85	212/19550	3.94104e-06	2.44759e-05	1.74672e-05	HLA-DQB1/CD74/HLA-DQA1/HLA-DPB1/HLA-DRA/HLA-DPA1/HLA-DRB5/HLA-DRB1	8	CC
GO:0005802	trans-Golgi network	8/85	259/19550	1.69969e-05	0.000100282	7.1566e-05	HLA-DQB1/CD74/HLA-DQA1/HLA-DPB1/HLA-DRA/HLA-DPA1/HLA-DRB5/HLA-DRB1	8	CC
GO:0005770	late endosome	7/85	282/19550	0.00022801	0.0012812	0.000914327	CD74/F2R/HLA-DRA/CD63/HLA-DRB5/HLA-DRB1/CST7	7	CC
GO:1990907	beta-catenin-TCF complex	2/85	13/19550	0.00141254	0.00757636	0.00540686	LEF1/TCF7	2	CC
GO:0005771	multivesicular body	3/85	64/19550	0.00272971	0.0140046	0.00999435	CD74/CD63/CST7	3	CC
GO:0042827	platelet dense granule	2/85	21/19550	0.00371812	0.0178637	0.0127484	CD63/CTSW	2	CC
GO:0031902	late endosome membrane	4/85	146/19550	0.00378467	0.0178637	0.0127484	HLA-DRA/CD63/HLA-DRB5/HLA-DRB1	4	CC
GO:0005775	vacuolar lumen	4/85	174/19550	0.00701479	0.0318364	0.02272	PLAC8/CD74/CTSD/FASLG	4	CC
GO:0008305	integrin complex	2/85	31/19550	0.00800458	0.034983	0.0249655	ITGAE/ITGA1	2	CC
GO:0043202	lysosomal lumen	3/85	97/19550	0.00871814	0.0367407	0.02622	CD74/CTSD/FASLG	3	CC
GO:0031904	endosome lumen	2/85	35/19550	0.0101281	0.0412107	0.02941	CD63/PRF1	2	CC
GO:0098636	protein complex involved in cell adhesion	2/85	36/19550	0.0106938	0.0420623	0.0300177	ITGAE/ITGA1	2	CC
GO:0042470	melanosome	3/85	109/19550	0.0119608	0.0441056	0.0314759	CAPG/CTSD/CD63	3	CC
GO:0048770	pigment granule	3/85	109/19550	0.0119608	0.0441056	0.0314759	CAPG/CTSD/CD63	3	CC
GO:0023023	MHC protein complex binding	12/85	36/18368	4.91416e-20	1.02214e-17	7.55228e-18	HLA-DQB1/CD74/KLRC2/HLA-DQA1/KLRC1/HLA-DPB1/HLA-DRA/HLA-DPA1/HLA-DRB5/HLA-DRB1/KLRD1/CD8A	12	MF
GO:0140375	immune receptor activity	13/85	144/18368	1.11143e-13	1.15589e-11	8.54048e-12	IL7R/CCR7/HLA-DQB1/CD74/IL2RB/KLRC2/HLA-DQA1/KLRC1/HLA-DRA/HLA-DPA1/CXCR6/HLA-DRB1/KLRD1	13	MF
GO:0023026	MHC class II protein complex binding	8/85	27/18368	3.10172e-13	2.15052e-11	1.58895e-11	HLA-DQB1/CD74/HLA-DQA1/HLA-DPB1/HLA-DRA/HLA-DPA1/HLA-DRB5/HLA-DRB1	8	MF
GO:0042605	peptide antigen binding	7/85	36/18368	2.64561e-10	1.37572e-08	1.01647e-08	HLA-DQB1/HLA-DQA1/HLA-DPB1/HLA-DRA/HLA-DPA1/HLA-DRB5/HLA-DRB1	7	MF
GO:0003823	antigen binding	11/85	171/18368	3.87534e-10	1.61214e-08	1.19116e-08	IL7R/HLA-DQB1/KLRC2/HLA-DQA1/LAG3/HLA-DPB1/HLA-DRA/HLA-DPA1/HLA-DRB5/HLA-DRB1/KLRD1	11	MF
GO:0032395	MHC class II receptor activity	5/85	10/18368	4.66129e-10	1.61591e-08	1.19394e-08	HLA-DQB1/HLA-DQA1/HLA-DRA/HLA-DPA1/HLA-DRB1	5	MF
GO:0042287	MHC protein binding	5/85	40/18368	1.09145e-06	3.24316e-05	2.39626e-05	CD74/LAG3/KLRD1/CD8B/CD8A	5	MF
GO:0030246	carbohydrate binding	8/85	271/18368	3.65141e-05	0.000949367	0.000701455	SELL/KLRC3/KLRC2/CD69/KLRC1/HLA-DRA/HLA-DRB1/KLRD1	8	MF
GO:0048020	CCR chemokine receptor binding	4/85	48/18368	7.11519e-05	0.00160585	0.00118651	CCL3/CCL4L1/CCL4/CCL5	4	MF
GO:0008009	chemokine activity	4/85	49/18368	7.72044e-05	0.00160585	0.00118651	CCL3/CCL4L1/CCL4/CCL5	4	MF
GO:0004896	cytokine receptor activity	5/85	97/18368	8.69517e-05	0.00164418	0.00121483	IL7R/CCR7/CD74/IL2RB/CXCR6	5	MF
GO:0042379	chemokine receptor binding	4/85	72/18368	0.000345771	0.00599336	0.00442829	CCL3/CCL4L1/CCL4/CCL5	4	MF
GO:0047844	deoxycytidine deaminase activity	2/85	10/18368	0.000929693	0.0148751	0.0109907	APOBEC3C/APOBEC3G	2	MF
GO:0042608	T cell receptor binding	2/85	11/18368	0.00113288	0.0168313	0.0124361	HLA-DRA/HLA-DRB1	2	MF
GO:0004126	cytidine deaminase activity	2/85	12/18368	0.00135537	0.0185038	0.0136718	APOBEC3C/APOBEC3G	2	MF
GO:0015026	coreceptor activity	3/85	48/18368	0.00142337	0.0185038	0.0136718	CXCR6/CD8B/CD8A	3	MF
GO:0016004	phospholipase activator activity	2/85	16/18368	0.00243486	0.0297912	0.0220117	CCL3/CCL5	2	MF
GO:0060229	lipase activator activity	2/85	18/18368	0.00308586	0.0356588	0.0263471	CCL3/CCL5	2	MF
GO:0003746	translation elongation factor activity	2/85	19/18368	0.00343857	0.0358116	0.02646	EEF1G/EEF2	2	MF
GO:0016505	peptidase activator activity involved in apoptotic process	2/85	20/18368	0.00380919	0.0358116	0.02646	MAL/RACK1	2	MF
GO:0042288	MHC class I protein binding	2/85	20/18368	0.00380919	0.0358116	0.02646	CD8B/CD8A	2	MF
GO:0019843	rRNA binding	3/85	68/18368	0.0038593	0.0358116	0.02646	RPS5/EEF2/RPLP0	3	MF
GO:0019955	cytokine binding	4/85	139/18368	0.00395994	0.0358116	0.02646	CCR7/CD74/IL2RB/CXCR6	4	MF
GO:0140416	transcription regulator inhibitor activity	2/85	21/18368	0.00419755	0.0363787	0.026879	LEF1/ID2	2	MF
GO:0005125	cytokine activity	5/85	235/18368	0.00469868	0.0390931	0.0288845	CCL3/FASLG/CCL4L1/CCL4/CCL5	5	MF
GO:0016493	C-C chemokine receptor activity	2/85	23/18368	0.00502682	0.0402145	0.0297132	CCR7/CXCR6	2	MF
GO:0001965	G-protein alpha-subunit binding	2/85	24/18368	0.0054674	0.040615	0.030009	F2R/RGS1	2	MF
GO:0019957	C-C chemokine binding	2/85	24/18368	0.0054674	0.040615	0.030009	CCR7/CXCR6	2	MF
GO:0030247	polysaccharide binding	2/85	25/18368	0.00592505	0.0424969	0.0313996	HLA-DRA/HLA-DRB1	2	MF
GO:0001637	G protein-coupled chemoattractant receptor activity	2/85	26/18368	0.00639962	0.0429394	0.0317265	CCR7/CXCR6	2	MF
GO:0004950	chemokine receptor activity	2/85	26/18368	0.00639962	0.0429394	0.0317265	CCR7/CXCR6	2	MF
GO:0001540	amyloid-beta binding	3/85	84/18368	0.00695924	0.045235	0.0334226	LDLRAP1/CD74/ITM2C	3	MF
GO:0046625	sphingolipid binding	2/85	29/18368	0.00792317	0.04994	0.036899	SELL/S1PR1	2	MF

## Sheet: Trajectory 2
Supplementary Table 9: GO Enrichment Analysis Results for Highly Weighted Genes Associated with Trajectory 2 of NSCLC (Benjamini–Hochberg-adjusted P value < 0.05)
ID	Description	GeneRatio	BgRatio	pvalue	p.adjust	qvalue	geneID	Count	ONTOLOGY
GO:0072678	T cell migration	8/87	66/18723	7.21636e-10	1.34441e-06	1.08169e-06	GPR183/ITGAL/ITGB7/MYO1G/RHOA/SPN/RIPOR2/S1PR1	8	BP
GO:0071674	mononuclear cell migration	11/87	196/18723	1.74902e-09	1.62921e-06	1.31085e-06	GPR183/TBX21/CD47/ITGAL/ITGB7/MYO1G/RHOA/SPN/RIPOR2/S1PR1/CX3CR1	11	BP
GO:0072676	lymphocyte migration	9/87	117/18723	3.62929e-09	2.25379e-06	1.81337e-06	GPR183/TBX21/ITGAL/ITGB7/MYO1G/RHOA/SPN/RIPOR2/S1PR1	9	BP
GO:0110053	regulation of actin filament organization	12/87	278/18723	5.9724e-09	2.78164e-06	2.23808e-06	S100A10/MTSS1/CD47/ARPC2/ADD3/RHOA/ACTR3/ARPC4/PXN/FLNA/S1PR1/PLEK	12	BP
GO:0032233	positive regulation of actin filament bundle assembly	7/87	63/18723	1.6398e-08	6.10989e-06	4.91594e-06	S100A10/MTSS1/CD47/RHOA/PXN/FLNA/PLEK	7	BP
GO:0032231	regulation of actin filament bundle assembly	8/87	105/18723	3.02544e-08	8.17475e-06	6.57731e-06	S100A10/MTSS1/CD47/RHOA/PXN/FLNA/S1PR1/PLEK	8	BP
GO:0045123	cellular extravasation	7/87	70/18723	3.46105e-08	8.17475e-06	6.57731e-06	ITGB1/CD47/ITGAL/ITGB7/SPN/RIPOR2/CX3CR1	7	BP
GO:0007229	integrin-mediated signaling pathway	8/87	107/18723	3.51036e-08	8.17475e-06	6.57731e-06	ITGB1/CD47/ITGAL/ITGB7/ITGB2/FGR/FLNA/PLEK	8	BP
GO:1902905	positive regulation of supramolecular fiber organization	10/87	209/18723	4.58687e-08	9.49481e-06	7.63941e-06	S100A10/MTSS1/CD47/ARPC2/RHOA/ACTR3/ARPC4/PXN/FLNA/PLEK	10	BP
GO:0051495	positive regulation of cytoskeleton organization	10/87	226/18723	9.56368e-08	1.78171e-05	1.43355e-05	S100A10/MTSS1/CD47/ARPC2/RHOA/ACTR3/ARPC4/PXN/FLNA/PLEK	10	BP
GO:0006968	cellular defense response	6/87	54/18723	1.82544e-07	3.09163e-05	2.48749e-05	ITGB1/SPN/KLRG1/PRF1/CX3CR1/GNLY	6	BP
GO:0061756	leukocyte adhesion to vascular endothelial cell	6/87	57/18723	2.53643e-07	3.93781e-05	3.16831e-05	ITGB1/ITGB7/RHOA/SPN/ITGB2/CX3CR1	6	BP
GO:0051017	actin filament bundle assembly	8/87	157/18723	6.81621e-07	9.76815e-05	7.85934e-05	S100A10/MTSS1/CD47/RHOA/PXN/FLNA/S1PR1/PLEK	8	BP
GO:0002456	T cell mediated immunity	7/87	109/18723	7.43441e-07	9.89308e-05	7.95985e-05	TBX21/LILRB1/MYO1G/CD8A/CTSC/PRF1/KLRD1	7	BP
GO:0061572	actin filament bundle organization	8/87	161/18723	8.24919e-07	0.000102455	8.2434e-05	S100A10/MTSS1/CD47/RHOA/PXN/FLNA/S1PR1/PLEK	8	BP
GO:0051015	actin filament binding	9/91	217/18368	1.2868e-06	0.000150973	0.000128264	ARPC2/SYNE1/ABI3/MYO1G/ADD3/MYO1F/ACTR3/ARPC4/FLNA	9	MF
GO:0042287	MHC protein binding	5/91	40/18368	1.53272e-06	0.000150973	0.000128264	LILRB1/CD8B/CD8A/FCRL6/KLRD1	5	MF
GO:0001909	leukocyte mediated cytotoxicity	7/87	124/18723	1.77565e-06	0.000206753	0.000166351	LILRB1/SLAMF7/CTSC/GZMB/PRF1/CX3CR1/KLRD1	7	BP
GO:0001906	cell killing	8/87	188/18723	2.64346e-06	0.000289692	0.000233083	LILRB1/SLAMF7/CTSC/GZMB/PRF1/CX3CR1/GNLY/KLRD1	8	BP
GO:0007163	establishment or maintenance of cell polarity	8/87	218/18723	7.88382e-06	0.000815976	0.000656524	ITGB1/CYTH1/RHOA/SPN/SLC9A3R1/ACTR3/RIPOR2/RAP1B	8	BP
GO:0034446	substrate adhesion-dependent cell spreading	6/87	108/18723	1.10712e-05	0.00108556	0.000873432	S100A10/ARPC2/ITGB7/RHOA/PXN/FLNA	6	BP
GO:0002698	negative regulation of immune effector process	6/87	110/18723	1.23007e-05	0.00114581	0.000921902	A2M/TBX21/CD47/LILRB1/CX3CR1/KLRD1	6	BP
GO:0019835	cytolysis	4/87	32/18723	1.41587e-05	0.00125608	0.00101063	GZMA/GZMB/PRF1/GZMH	4	BP
GO:0050901	leukocyte tethering or rolling	4/87	33/18723	1.60546e-05	0.00135953	0.00109387	ITGB1/ITGB7/SPN/CX3CR1	4	BP
GO:0030032	lamellipodium assembly	5/87	72/18723	2.11256e-05	0.00171117	0.00137679	ITGB1/ARPC2/ABI3/ACTR3/S1PR1	5	BP
GO:0023023	MHC protein complex binding	4/91	36/18368	2.94121e-05	0.00193139	0.00164088	LILRB1/HLA-DPB1/CD8A/KLRD1	4	MF
GO:0002695	negative regulation of leukocyte activation	7/87	187/18723	2.63961e-05	0.002049	0.0016486	TBX21/LILRB1/ID2/SPN/CST7/RIPOR2/FGR	7	BP
GO:0008305	integrin complex	4/91	31/19550	1.25534e-05	0.00211244	0.00166468	ITGB1/ITGAL/ITGB7/ITGB2	4	CC
GO:0098636	protein complex involved in cell adhesion	4/91	36/19550	2.30868e-05	0.00211244	0.00166468	ITGB1/ITGAL/ITGB7/ITGB2	4	CC
GO:0030027	lamellipodium	7/91	202/19550	4.4042e-05	0.00268656	0.00211711	ITGB1/ARPC2/ABI3/MYO1G/RHOA/ACTR3/PXN	7	CC
GO:0002366	leukocyte activation involved in immune response	8/87	275/18723	4.19346e-05	0.00312497	0.00251431	GPR183/TBX21/ITGAL/LILRB1/SPN/ITGB2/FGR/CX3CR1	8	BP
GO:0002263	cell activation involved in immune response	8/87	279/18723	4.64374e-05	0.00332742	0.0026772	GPR183/TBX21/ITGAL/LILRB1/SPN/ITGB2/FGR/CX3CR1	8	BP
GO:2000177	regulation of neural precursor cell proliferation	5/87	87/18723	5.28251e-05	0.00354939	0.0028558	ID2/RHOA/FLNA/ADGRG1/CX3CR1	5	BP
GO:0030010	establishment of cell polarity	6/87	143/18723	5.42795e-05	0.00354939	0.0028558	ITGB1/CYTH1/RHOA/SLC9A3R1/RIPOR2/RAP1B	6	BP
GO:0050866	negative regulation of cell activation	7/87	210/18723	5.52509e-05	0.00354939	0.0028558	TBX21/LILRB1/ID2/SPN/CST7/RIPOR2/FGR	7	BP
GO:0097581	lamellipodium organization	5/87	90/18723	6.21498e-05	0.0038595	0.00310531	ITGB1/ARPC2/ABI3/ACTR3/S1PR1	5	BP
GO:0051492	regulation of stress fiber assembly	5/87	91/18723	6.55243e-05	0.00387715	0.00311951	S100A10/CD47/RHOA/PXN/S1PR1	5	BP
GO:0001774	microglial cell activation	4/87	47/18723	6.65963e-05	0.00387715	0.00311951	ITGB2/CTSC/CST7/CX3CR1	4	BP
GO:0001913	T cell mediated cytotoxicity	4/87	49/18723	7.85507e-05	0.00443455	0.00356798	LILRB1/CTSC/PRF1/KLRD1	4	BP
GO:0015026	coreceptor activity	4/91	48/18368	9.28472e-05	0.00457272	0.00388492	ITGB1/CD8B/CD8A/TGFBR3	4	MF
GO:1903975	regulation of glial cell migration	3/87	19/18723	8.89839e-05	0.00485119	0.00390321	GPR183/IDH2/CX3CR1	3	BP
GO:0051250	negative regulation of lymphocyte activation	6/87	157/18723	9.11388e-05	0.00485119	0.00390321	TBX21/LILRB1/ID2/SPN/RIPOR2/FGR	6	BP
GO:0051496	positive regulation of stress fiber assembly	4/87	52/18723	9.93093e-05	0.00486366	0.00391324	S100A10/CD47/RHOA/PXN	4	BP
GO:0110020	regulation of actomyosin structure organization	5/87	100/18723	0.000102664	0.00486366	0.00391324	S100A10/CD47/RHOA/PXN/S1PR1	5	BP
GO:0007160	cell-matrix adhesion	7/87	233/18723	0.000106018	0.00486366	0.00391324	S100A10/ITGB1/ITGAL/ITGB7/RHOA/ITGB2/PXN	7	BP
GO:0007188	adenylate cyclase-modulating G protein-coupled receptor signaling pathway	7/87	233/18723	0.000106018	0.00486366	0.00391324	RGS1/ADRB2/SLC9A3R1/S1PR5/FLNA/S1PR1/ADGRG1	7	BP
GO:0008347	glial cell migration	4/87	53/18723	0.000107037	0.00486366	0.00391324	GPR183/IDH2/ADGRG1/CX3CR1	4	BP
GO:0043113	receptor clustering	4/87	53/18723	0.000107037	0.00486366	0.00391324	ITGAL/ITGB7/ITGB2/FLNA	4	BP
GO:0042288	MHC class I protein binding	3/91	20/18368	0.000126161	0.00497075	0.00422308	LILRB1/CD8B/CD8A	3	MF
GO:0009898	cytoplasmic side of plasma membrane	6/91	172/19550	0.000152669	0.00596137	0.00469777	RGS1/MTSS1/CYTH1/RHOA/FGR/LITAF	6	CC
GO:0001726	ruffle	6/91	178/19550	0.000183966	0.00596137	0.00469777	MTSS1/ITGB1/RHOA/SLC9A3R1/FGR/PLEK	6	CC
GO:0031256	leading edge membrane	6/91	180/19550	0.000195455	0.00596137	0.00469777	ITGB1/MYO1G/RHOA/RIPOR2/FGR/PLEK	6	CC
GO:0030038	contractile actin filament bundle assembly	5/87	106/18723	0.00013521	0.00585804	0.00471331	S100A10/CD47/RHOA/PXN/S1PR1	5	BP
GO:0043149	stress fiber assembly	5/87	106/18723	0.00013521	0.00585804	0.00471331	S100A10/CD47/RHOA/PXN/S1PR1	5	BP
GO:0031532	actin cytoskeleton reorganization	5/87	107/18723	0.000141323	0.00598376	0.00481446	ABI3/RHOA/FLNA/S1PR1/PLEK	5	BP
GO:0002363	alpha-beta T cell lineage commitment	3/87	23/18723	0.000160461	0.00664308	0.00534494	TBX21/RHOA/SPN	3	BP
GO:0001911	negative regulation of leukocyte mediated cytotoxicity	3/87	24/18723	0.000182769	0.00735046	0.00591409	LILRB1/CX3CR1/KLRD1	3	BP
GO:0034113	heterotypic cell-cell adhesion	4/87	61/18723	0.000185438	0.00735046	0.00591409	ITGB1/CD47/ITGB7/ITGB2	4	BP
GO:0002286	T cell activation involved in immune response	5/87	114/18723	0.000190256	0.0073843	0.00594132	GPR183/TBX21/ITGAL/LILRB1/SPN	5	BP
GO:0071675	regulation of mononuclear cell migration	5/87	115/18723	0.000198183	0.00753498	0.00606256	CD47/RHOA/SPN/RIPOR2/CX3CR1	5	BP
GO:0002704	negative regulation of leukocyte mediated immunity	4/87	63/18723	0.000210177	0.00783118	0.00630088	TBX21/LILRB1/CX3CR1/KLRD1	4	BP
GO:0004252	serine-type endopeptidase activity	6/91	174/18368	0.000227077	0.00745571	0.00633426	GZMK/GZMA/CTSC/PRSS23/GZMB/GZMH	6	MF
GO:0098562	cytoplasmic side of membrane	6/91	197/19550	0.000317702	0.00830564	0.00654514	RGS1/MTSS1/CYTH1/RHOA/FGR/LITAF	6	CC
GO:0002710	negative regulation of T cell mediated immunity	3/87	26/18723	0.000233211	0.00849845	0.00683775	TBX21/LILRB1/KLRD1	3	BP
GO:0071677	positive regulation of mononuclear cell migration	4/87	65/18723	0.000237208	0.00849845	0.00683775	CD47/RHOA/SPN/CX3CR1	4	BP
GO:0008064	regulation of actin polymerization or depolymerization	6/87	188/18723	0.000243511	0.00855964	0.00688698	ARPC2/ADD3/RHOA/ACTR3/ARPC4/PLEK	6	BP
GO:0030832	regulation of actin filament length	6/87	189/18723	0.000250568	0.0086446	0.00695534	ARPC2/ADD3/RHOA/ACTR3/ARPC4/PLEK	6	BP
GO:0002433	immune response-regulating cell surface receptor signaling pathway involved in phagocytosis	3/87	27/18723	0.000261483	0.00869898	0.00699909	CD47/MYO1G/FGR	3	BP
GO:0038096	Fc-gamma receptor signaling pathway involved in phagocytosis	3/87	27/18723	0.000261483	0.00869898	0.00699909	CD47/MYO1G/FGR	3	BP
GO:0042267	natural killer cell mediated cytotoxicity	4/87	68/18723	0.000282323	0.00921647	0.00741546	LILRB1/SLAMF7/GZMB/KLRD1	4	BP
GO:0031342	negative regulation of cell killing	3/87	28/18723	0.00029188	0.00921647	0.00741546	LILRB1/CX3CR1/KLRD1	3	BP
GO:0038094	Fc-gamma receptor signaling pathway	3/87	28/18723	0.00029188	0.00921647	0.00741546	CD47/MYO1G/FGR	3	BP
GO:0031032	actomyosin structure organization	6/87	196/18723	0.000304599	0.00945779	0.00760962	S100A10/ITGB1/CD47/RHOA/PXN/S1PR1	6	BP
GO:0002360	T cell lineage commitment	3/87	29/18723	0.000324468	0.00990956	0.00797311	TBX21/RHOA/SPN	3	BP
GO:0008236	serine-type peptidase activity	6/91	191/18368	0.00037441	0.00940222	0.00798799	GZMK/GZMA/CTSC/PRSS23/GZMB/GZMH	6	MF
GO:0017171	serine hydrolase activity	6/91	195/18368	0.000418039	0.00940222	0.00798799	GZMK/GZMA/CTSC/PRSS23/GZMB/GZMH	6	MF
GO:0019902	phosphatase binding	6/91	196/18368	0.000429543	0.00940222	0.00798799	LILRB1/SLC9A3R1/CTSC/PPP1CA/PXN/FCRL6	6	MF
GO:0002228	natural killer cell mediated immunity	4/87	71/18723	0.000333291	0.0100148	0.00805783	LILRB1/SLAMF7/GZMB/KLRD1	4	BP
GO:0090162	establishment of epithelial cell polarity	3/87	31/18723	0.000396478	0.0117244	0.00943332	CYTH1/RHOA/SLC9A3R1	3	BP
GO:0019956	chemokine binding	3/91	33/18368	0.000576318	0.0113535	0.00964574	A2M/ITGB1/CX3CR1	3	MF
GO:0002687	positive regulation of leukocyte migration	5/87	135/18723	0.00041635	0.0121197	0.00975135	CD47/RHOA/SPN/RIPOR2/CX3CR1	5	BP
GO:0098858	actin-based cell projection	6/91	221/19550	0.000584284	0.0133655	0.0105325	ITGB1/MYO1G/SPN/SLC9A3R1/MYO1F/RIPOR2	6	CC
GO:0002431	Fc receptor mediated stimulatory signaling pathway	3/87	33/18723	0.000478025	0.0137009	0.0110236	CD47/MYO1G/FGR	3	BP
GO:0008154	actin polymerization or depolymerization	6/87	218/18723	0.000535932	0.0151279	0.0121717	ARPC2/ADD3/RHOA/ACTR3/ARPC4/PLEK	6	BP
GO:0061351	neural precursor cell proliferation	5/87	145/18723	0.000576971	0.0160432	0.0129082	ID2/RHOA/FLNA/ADGRG1/CX3CR1	5	BP
GO:0007189	adenylate cyclase-activating G protein-coupled receptor signaling pathway	5/87	146/18723	0.00059527	0.0163086	0.0131217	ADRB2/SLC9A3R1/S1PR5/S1PR1/ADGRG1	5	BP
GO:0005902	microvillus	4/91	91/19550	0.000862001	0.0171293	0.0134985	MYO1G/SPN/SLC9A3R1/MYO1F	4	CC
GO:0098862	cluster of actin-based cell projections	5/91	161/19550	0.000936028	0.0171293	0.0134985	ADD3/SLC9A3R1/ACTR3/RIPOR2/FLNA	5	CC
GO:0002703	regulation of leukocyte mediated immunity	6/87	226/18723	0.00064758	0.0174847	0.0140679	TBX21/LILRB1/ITGB2/FGR/CX3CR1/KLRD1	6	BP
GO:0032587	ruffle membrane	4/91	99/19550	0.00118029	0.0186192	0.0146726	ITGB1/RHOA/FGR/PLEK	4	CC
GO:0031234	extrinsic component of cytoplasmic side of plasma membrane	4/91	101/19550	0.00127117	0.0186192	0.0146726	RGS1/CYTH1/RHOA/FGR	4	CC
GO:0019897	extrinsic component of plasma membrane	5/91	174/19550	0.00132267	0.0186192	0.0146726	RGS1/S100A10/CYTH1/RHOA/FGR	5	CC
GO:0005903	brush border	4/91	106/19550	0.00151959	0.0191912	0.0151233	ADD3/SLC9A3R1/ACTR3/FLNA	4	CC
GO:0030175	filopodium	4/91	107/19550	0.00157305	0.0191912	0.0151233	ITGB1/MYO1G/SLC9A3R1/RIPOR2	4	CC
GO:0008097	5S rRNA binding	2/91	10/18368	0.00106456	0.0190652	0.0161975	RPL5/GTF3A	2	MF
GO:0034314	Arp2/3 complex-mediated actin nucleation	3/87	39/18723	0.000784773	0.0207811	0.0167202	ARPC2/ACTR3/ARPC4	3	BP
GO:0002699	positive regulation of immune effector process	6/87	235/18723	0.000793914	0.0207811	0.0167202	TBX21/LILRB1/SPON2/ITGB2/FGR/KLRD1	6	BP
GO:0046631	alpha-beta T cell activation	5/87	156/18723	0.000803134	0.0207811	0.0167202	GPR183/TBX21/LILRB1/RHOA/SPN	5	BP
GO:0031334	positive regulation of protein-containing complex assembly	6/87	237/18723	0.00082965	0.0211731	0.0170356	ARPC2/RHOA/ACTR3/ARPC4/RAP1B/PLEK	6	BP
GO:1900026	positive regulation of substrate adhesion-dependent cell spreading	3/87	41/18723	0.000909274	0.0223924	0.0180167	S100A10/ARPC2/FLNA	3	BP
GO:0001915	negative regulation of T cell mediated cytotoxicity	2/87	10/18723	0.000937524	0.0223924	0.0180167	LILRB1/KLRD1	2	BP
GO:0002291	T cell activation via T cell receptor contact with antigen bound to MHC molecule on antigen presenting cell	2/87	10/18723	0.000937524	0.0223924	0.0180167	ITGAL/LILRB1	2	BP
GO:0021932	hindbrain radial glia guided cell migration	2/87	10/18723	0.000937524	0.0223924	0.0180167	ITGB1/FLNA	2	BP
GO:0040015	negative regulation of multicellular organism growth	2/87	10/18723	0.000937524	0.0223924	0.0180167	ADRB2/PLAC8	2	BP
GO:0019864	IgG binding	2/91	11/18368	0.00129693	0.0212913	0.0180888	FCGR3B/FCGR3A	2	MF
GO:0010591	regulation of lamellipodium assembly	3/87	42/18723	0.000975946	0.0227273	0.0182861	ARPC2/ABI3/ACTR3	3	BP
GO:2000404	regulation of T cell migration	3/87	42/18723	0.000975946	0.0227273	0.0182861	RHOA/SPN/RIPOR2	3	BP
GO:0061383	trabecula morphogenesis	3/87	43/18723	0.00104564	0.0240496	0.01935	RHOA/TGFBR3/S1PR1	3	BP
GO:0034767	positive regulation of ion transmembrane transport	5/87	167/18723	0.00108975	0.024491	0.0197052	ITGB1/ADRB2/ARL6IP1/SLC9A3R1/FLNA	5	BP
GO:0150076	neuroinflammatory response	3/87	44/18723	0.0011184	0.024491	0.0197052	ITGB1/CTSC/CST7	3	BP
GO:0002357	defense response to tumor cell	2/87	11/18723	0.0011424	0.024491	0.0197052	ABI3/PRF1	2	BP
GO:0033625	positive regulation of integrin activation	2/87	11/18723	0.0011424	0.024491	0.0197052	RAP1B/PLEK	2	BP
GO:1903961	positive regulation of anion transmembrane transport	2/87	11/18723	0.0011424	0.024491	0.0197052	ITGB1/ARL6IP1	2	BP
GO:0002444	myeloid leukocyte mediated immunity	4/87	99/18723	0.00116999	0.024491	0.0197052	SPON2/ITGB2/FGR/CX3CR1	4	BP
GO:0030838	positive regulation of actin filament polymerization	4/87	99/18723	0.00116999	0.024491	0.0197052	ARPC2/RHOA/ACTR3/ARPC4	4	BP
GO:0031341	regulation of cell killing	4/87	99/18723	0.00116999	0.024491	0.0197052	LILRB1/PRF1/CX3CR1/KLRD1	4	BP
GO:0030833	regulation of actin filament polymerization	5/87	172/18723	0.00124252	0.0257201	0.0206941	ARPC2/ADD3/RHOA/ACTR3/ARPC4	5	BP
GO:0005200	structural constituent of cytoskeleton	4/91	103/18368	0.00171509	0.0259902	0.0220809	ARPC2/ADD3/ACTR3/ARPC4	4	MF
GO:0060907	positive regulation of macrophage cytokine production	2/87	12/18723	0.00136675	0.0279808	0.022513	LILRB1/SPON2	2	BP
GO:0042116	macrophage activation	4/87	106/18723	0.00150647	0.0302094	0.0243061	ITGB2/CTSC/CST7/CX3CR1	4	BP
GO:0009409	response to cold	3/87	49/18723	0.00153003	0.0302094	0.0243061	ADRB2/PLAC8/UCP2	3	BP
GO:0050832	defense response to fungus	3/87	49/18723	0.00153003	0.0302094	0.0243061	SPON2/CX3CR1/GNLY	3	BP
GO:0032640	tumor necrosis factor production	5/87	181/18723	0.00155668	0.0302094	0.0243061	CD47/LILRB1/SPON2/SPN/CX3CR1	5	BP
GO:0032680	regulation of tumor necrosis factor production	5/87	181/18723	0.00155668	0.0302094	0.0243061	CD47/LILRB1/SPON2/SPN/CX3CR1	5	BP
GO:0010958	regulation of amino acid import across plasma membrane	2/87	13/18723	0.00161038	0.0302227	0.0243168	ITGB1/ARL6IP1	2	BP
GO:1903789	regulation of amino acid transmembrane transport	2/87	13/18723	0.00161038	0.0302227	0.0243168	ITGB1/ARL6IP1	2	BP
GO:0038093	Fc receptor signaling pathway	3/87	50/18723	0.00162226	0.0302227	0.0243168	CD47/MYO1G/FGR	3	BP
GO:0045058	T cell selection	3/87	50/18723	0.00162226	0.0302227	0.0243168	TBX21/RHOA/SPN	3	BP
GO:0048872	homeostasis of number of cells	6/87	272/18723	0.00168066	0.0310007	0.0249428	GPR183/ID2/KLF2/TGFBR3/ADGRG1/CX3CR1	6	BP
GO:0071706	tumor necrosis factor superfamily cytokine production	5/87	186/18723	0.00175462	0.0317364	0.0255347	CD47/LILRB1/SPON2/SPN/CX3CR1	5	BP
GO:1903555	regulation of tumor necrosis factor superfamily cytokine production	5/87	186/18723	0.00175462	0.0317364	0.0255347	CD47/LILRB1/SPON2/SPN/CX3CR1	5	BP
GO:0043090	amino acid import	3/87	52/18723	0.001817	0.0322388	0.0259389	ITGB1/ARL6IP1/SLC9A3R1	3	BP
GO:0045010	actin nucleation	3/87	52/18723	0.001817	0.0322388	0.0259389	ARPC2/ACTR3/ARPC4	3	BP
GO:0046632	alpha-beta T cell differentiation	4/87	112/18723	0.00184418	0.0324123	0.0260786	GPR183/TBX21/RHOA/SPN	4	BP
GO:0003376	sphingosine-1-phosphate receptor signaling pathway	2/87	14/18723	0.00187311	0.032613	0.0262401	S1PR5/S1PR1	2	BP
GO:0002707	negative regulation of lymphocyte mediated immunity	3/87	53/18723	0.0019196	0.0331131	0.0266424	TBX21/LILRB1/KLRD1	3	BP
GO:0030041	actin filament polymerization	5/87	191/18723	0.00197044	0.0336782	0.0270971	ARPC2/ADD3/RHOA/ACTR3/ARPC4	5	BP
GO:0002823	negative regulation of adaptive immune response based on somatic recombination of immune receptors built from immunoglobulin superfamily domains	3/87	54/18723	0.00202574	0.033696	0.0271114	TBX21/LILRB1/KLRD1	3	BP
GO:1902743	regulation of lamellipodium organization	3/87	54/18723	0.00202574	0.033696	0.0271114	ARPC2/ABI3/ACTR3	3	BP
GO:2000179	positive regulation of neural precursor cell proliferation	3/87	54/18723	0.00202574	0.033696	0.0271114	FLNA/ADGRG1/CX3CR1	3	BP
GO:0002285	lymphocyte activation involved in immune response	5/87	194/18723	0.00210891	0.034464	0.0277293	GPR183/TBX21/ITGAL/LILRB1/SPN	5	BP
GO:0050777	negative regulation of immune response	5/87	194/18723	0.00210891	0.034464	0.0277293	A2M/TBX21/LILRB1/FGR/KLRD1	5	BP
GO:0051938	L-glutamate import	2/87	15/18723	0.00215476	0.0346062	0.0278437	ITGB1/ARL6IP1	2	BP
GO:0098712	L-glutamate import across plasma membrane	2/87	15/18723	0.00215476	0.0346062	0.0278437	ITGB1/ARL6IP1	2	BP
GO:0002886	regulation of myeloid leukocyte mediated immunity	3/87	56/18723	0.00224882	0.0355047	0.0285667	ITGB2/FGR/CX3CR1	3	BP
GO:0015800	acidic amino acid transport	3/87	56/18723	0.00224882	0.0355047	0.0285667	ITGB1/ARL6IP1/SLC9A3R1	3	BP
GO:0045125	bioactive lipid receptor activity	2/91	15/18368	0.00244424	0.034394	0.0292206	S1PR5/S1PR1	2	MF
GO:1900024	regulation of substrate adhesion-dependent cell spreading	3/87	57/18723	0.00236585	0.0370385	0.0298007	S100A10/ARPC2/FLNA	3	BP
GO:0002693	positive regulation of cellular extravasation	2/87	16/18723	0.00245516	0.0374915	0.0301652	CD47/RIPOR2	2	BP
GO:0021535	cell migration in hindbrain	2/87	16/18723	0.00245516	0.0374915	0.0301652	ITGB1/FLNA	2	BP
GO:0090520	sphingolipid mediated signaling pathway	2/87	16/18723	0.00245516	0.0374915	0.0301652	S1PR5/S1PR1	2	BP
GO:0050868	negative regulation of T cell activation	4/87	122/18723	0.00251813	0.0381405	0.0306874	TBX21/LILRB1/SPN/RIPOR2	4	BP
GO:0002820	negative regulation of adaptive immune response	3/87	59/18723	0.00261107	0.0392292	0.0315633	TBX21/LILRB1/KLRD1	3	BP
GO:0009620	response to fungus	3/87	60/18723	0.00273934	0.0400637	0.0322348	SPON2/CX3CR1/GNLY	3	BP
GO:0010934	macrophage cytokine production	2/87	17/18723	0.00277414	0.0400637	0.0322348	LILRB1/SPON2	2	BP
GO:0010935	regulation of macrophage cytokine production	2/87	17/18723	0.00277414	0.0400637	0.0322348	LILRB1/SPON2	2	BP
GO:0033623	regulation of integrin activation	2/87	17/18723	0.00277414	0.0400637	0.0322348	RAP1B/PLEK	2	BP
GO:0045198	establishment of epithelial cell apical/basal polarity	2/87	17/18723	0.00277414	0.0400637	0.0322348	RHOA/SLC9A3R1	2	BP
GO:2000401	regulation of lymphocyte migration	3/87	61/18723	0.00287144	0.0411499	0.0331088	RHOA/SPN/RIPOR2	3	BP
GO:0071222	cellular response to lipopolysaccharide	5/87	209/18723	0.00291011	0.0413857	0.0332984	LILRB1/RHOA/SPON2/LITAF/CX3CR1	5	BP
GO:0002685	regulation of leukocyte migration	5/87	210/18723	0.00297036	0.0419225	0.0337304	CD47/RHOA/SPN/RIPOR2/CX3CR1	5	BP
GO:0045428	regulation of nitric oxide biosynthetic process	3/87	62/18723	0.0030074	0.0421262	0.0338943	CD47/KLF2/CX3CR1	3	BP
GO:0002295	T-helper cell lineage commitment	2/87	18/18723	0.0031115	0.042623	0.034294	TBX21/SPN	2	BP
GO:0045953	negative regulation of natural killer cell mediated cytotoxicity	2/87	18/18723	0.0031115	0.042623	0.034294	LILRB1/KLRD1	2	BP
GO:0071800	podosome assembly	2/87	18/18723	0.0031115	0.042623	0.034294	RHOA/BIN2	2	BP
GO:0005839	proteasome core complex	2/91	20/19550	0.00385542	0.0440964	0.0347495	PSMA2/PSMB8	2	CC
GO:0098631	cell adhesion mediator activity	3/91	59/18368	0.0031296	0.041102	0.0349197	ITGB1/CD47/PPP1CA	3	MF
GO:0080164	regulation of nitric oxide metabolic process	3/87	64/18723	0.00329106	0.0447536	0.0360082	CD47/KLF2/CX3CR1	3	BP
GO:0002716	negative regulation of natural killer cell mediated immunity	2/87	19/18723	0.0034671	0.0458099	0.0368581	LILRB1/KLRD1	2	BP
GO:0030050	vesicle transport along actin filament	2/87	19/18723	0.0034671	0.0458099	0.0368581	MYO1G/MYO1F	2	BP
GO:0051957	positive regulation of amino acid transport	2/87	19/18723	0.0034671	0.0458099	0.0368581	ITGB1/ARL6IP1	2	BP
GO:1903978	regulation of microglial cell activation	2/87	19/18723	0.0034671	0.0458099	0.0368581	CTSC/CST7	2	BP
GO:0034764	positive regulation of transmembrane transport	5/87	219/18723	0.00355392	0.0466264	0.0375151	ITGB1/ADRB2/ARL6IP1/SLC9A3R1/FLNA	5	BP
GO:0042093	T-helper cell differentiation	3/87	66/18723	0.0035906	0.0467782	0.0376372	GPR183/TBX21/SPN	3	BP
GO:0071219	cellular response to molecule of bacterial origin	5/87	221/18723	0.00369404	0.0477916	0.0384526	LILRB1/RHOA/SPON2/LITAF/CX3CR1	5	BP
GO:0007266	Rho protein signal transduction	4/87	137/18723	0.00382016	0.048975	0.0394047	ITGB1/RHOA/RIPOR2/ADGRG1	4	BP
GO:0002274	myeloid leukocyte activation	5/87	223/18723	0.00383809	0.048975	0.0394047	ITGB2/CTSC/CST7/FGR/CX3CR1	5	BP
GO:0002294	CD4-positive, alpha-beta T cell differentiation involved in immune response	3/87	68/18723	0.00390629	0.04935	0.0397064	GPR183/TBX21/SPN	3	BP
GO:0032273	positive regulation of protein polymerization	4/87	138/18723	0.00392045	0.04935	0.0397064	ARPC2/RHOA/ACTR3/ARPC4	4	BP
