# Supplementary material for: A model-based factorization method for scRNA data unveils bifurcating transcriptional modules underlying cell fate determination
Source: eLife. 2025 Feb 5;13:RP97424. doi: 10.7554/eLife.97424 (PMC11798574; doi:10.7554/eLife.97424)
Supplement: Supplementary file 10. [file elife-97424-supp10.xlsx]

## Sheet: Trajectory 1
Supplementary file 10: GO Enrichment Analysis Results for Highly Weighted Genes Associated with Trajectory 1 of CRC (Benjamini–Hochberg-adjusted P value < 0.05)
ID	Description	GeneRatio	BgRatio	pvalue	p.adjust	qvalue	geneID	Count	ONTOLOGY
GO:0050870	positive regulation of T cell activation	19/88	216/18723	3.00383e-19	5.63819e-16	3.99984e-16	IL7R/CCR7/LEF1/CD28/PTPN22/TNFSF4/CD74/HLA-DMA/VCAM1/HLA-DQB1/HLA-DQA1/IFNG/HLA-DPA1/HLA-DPB1/HAVCR2/HLA-DRB5/HLA-DRA/HLA-DRB1/CCL5	19	BP
GO:0042613	MHC class II protein complex	9/89	17/19550	1.30739e-17	1.35968e-15	9.90861e-16	CD74/HLA-DMA/HLA-DQB1/HLA-DQA1/HLA-DPA1/HLA-DPB1/HLA-DRB5/HLA-DRA/HLA-DRB1	9	CC
GO:1903039	positive regulation of leukocyte cell-cell adhesion	19/88	239/18723	2.0523e-18	1.62158e-15	1.15038e-15	IL7R/CCR7/LEF1/CD28/PTPN22/TNFSF4/CD74/HLA-DMA/VCAM1/HLA-DQB1/HLA-DQA1/IFNG/HLA-DPA1/HLA-DPB1/HAVCR2/HLA-DRB5/HLA-DRA/HLA-DRB1/CCL5	19	BP
GO:0022409	positive regulation of cell-cell adhesion	20/88	284/18723	2.59176e-18	1.62158e-15	1.15038e-15	IL7R/CCR7/LEF1/CD28/PTPN22/TNFSF4/CD74/HLA-DMA/VCAM1/HLA-DQB1/HLA-DQA1/IFNG/CXCL13/HLA-DPA1/HLA-DPB1/HAVCR2/HLA-DRB5/HLA-DRA/HLA-DRB1/CCL5	20	BP
GO:0023023	MHC protein complex binding	11/89	36/18368	9.92323e-18	1.84572e-15	1.37881e-15	CD74/HLA-DMA/HLA-DQB1/HLA-DQA1/HLA-DPA1/HLA-DPB1/KLRD1/HLA-DRB5/HLA-DRA/HLA-DRB1/CD8A	11	MF
GO:0042611	MHC protein complex	9/89	25/19550	1.06673e-15	5.54701e-14	4.04236e-14	CD74/HLA-DMA/HLA-DQB1/HLA-DQA1/HLA-DPA1/HLA-DPB1/HLA-DRB5/HLA-DRA/HLA-DRB1	9	CC
GO:0030217	T cell differentiation	18/88	257/18723	1.69074e-16	7.93382e-14	5.6284e-14	IL7R/GPR183/CCR7/LEF1/CD28/TCF7/PTPN22/THEMIS/TNFSF4/CD74/ZNF683/EOMES/CRTAM/LAG3/IFNG/HLA-DRA/HLA-DRB1/CD8A	18	BP
GO:0001906	cell killing	16/88	188/18723	4.31397e-16	1.61946e-13	1.14888e-13	IL7R/RAB27A/CTSC/SH2D1A/GNLY/CRTAM/LYST/LAG3/SLAMF7/IFNG/HAVCR2/KLRD1/PRF1/HLA-DRA/HLA-DRB1/GZMB	16	BP
GO:0001909	leukocyte mediated cytotoxicity	14/88	124/18723	6.26819e-16	1.9609e-13	1.3911e-13	IL7R/RAB27A/CTSC/SH2D1A/CRTAM/LYST/LAG3/SLAMF7/HAVCR2/KLRD1/PRF1/HLA-DRA/HLA-DRB1/GZMB	14	BP
GO:0023026	MHC class II protein complex binding	9/89	27/18368	4.24051e-15	3.94368e-13	2.94604e-13	CD74/HLA-DMA/HLA-DQB1/HLA-DQA1/HLA-DPA1/HLA-DPB1/HLA-DRB5/HLA-DRA/HLA-DRB1	9	MF
GO:0002399	MHC class II protein complex assembly	8/88	16/18723	2.14572e-15	5.0344e-13	3.5715e-13	HLA-DMA/HLA-DQB1/HLA-DQA1/HLA-DPA1/HLA-DPB1/HLA-DRB5/HLA-DRA/HLA-DRB1	8	BP
GO:0002503	peptide antigen assembly with MHC class II protein complex	8/88	16/18723	2.14572e-15	5.0344e-13	3.5715e-13	HLA-DMA/HLA-DQB1/HLA-DQA1/HLA-DPA1/HLA-DPB1/HLA-DRB5/HLA-DRA/HLA-DRB1	8	BP
GO:0002501	peptide antigen assembly with MHC protein complex	8/88	18/18723	7.24012e-15	1.50997e-12	1.0712e-12	HLA-DMA/HLA-DQB1/HLA-DQA1/HLA-DPA1/HLA-DPB1/HLA-DRB5/HLA-DRA/HLA-DRB1	8	BP
GO:0019886	antigen processing and presentation of exogenous peptide antigen via MHC class II	9/88	30/18723	9.7041e-15	1.82146e-12	1.29218e-12	CD74/HLA-DMA/HLA-DQB1/HLA-DQA1/HLA-DPA1/HLA-DPB1/HLA-DRB5/HLA-DRA/HLA-DRB1	9	BP
GO:0002396	MHC protein complex assembly	8/88	19/18723	1.24581e-14	2.12581e-12	1.50809e-12	HLA-DMA/HLA-DQB1/HLA-DQA1/HLA-DPA1/HLA-DPB1/HLA-DRB5/HLA-DRA/HLA-DRB1	8	BP
GO:0002495	antigen processing and presentation of peptide antigen via MHC class II	9/88	34/18723	3.50384e-14	5.48059e-12	3.88803e-12	CD74/HLA-DMA/HLA-DQB1/HLA-DQA1/HLA-DPA1/HLA-DPB1/HLA-DRB5/HLA-DRA/HLA-DRB1	9	BP
GO:0002504	antigen processing and presentation of peptide or polysaccharide antigen via MHC class II	9/88	36/18723	6.24123e-14	9.01138e-12	6.39284e-12	CD74/HLA-DMA/HLA-DQB1/HLA-DQA1/HLA-DPA1/HLA-DPB1/HLA-DRB5/HLA-DRA/HLA-DRB1	9	BP
GO:0019882	antigen processing and presentation	12/88	106/18723	8.22131e-14	1.10224e-11	7.81951e-12	CCR7/RAB27A/CD74/HLA-DMA/HLA-DQB1/HLA-DQA1/HLA-DPA1/HLA-DPB1/HLA-DRB5/HLA-DRA/HLA-DRB1/CD8A	12	BP
GO:0002478	antigen processing and presentation of exogenous peptide antigen	9/88	38/18723	1.07249e-13	1.34204e-11	9.52068e-12	CD74/HLA-DMA/HLA-DQB1/HLA-DQA1/HLA-DPA1/HLA-DPB1/HLA-DRB5/HLA-DRA/HLA-DRB1	9	BP
GO:0071556	integral component of lumenal side of endoplasmic reticulum membrane	8/89	29/19550	5.3081e-13	1.38011e-11	1.00574e-11	CD74/HLA-DQB1/HLA-DQA1/HLA-DPA1/HLA-DPB1/HLA-DRB5/HLA-DRA/HLA-DRB1	8	CC
GO:0098553	lumenal side of endoplasmic reticulum membrane	8/89	29/19550	5.3081e-13	1.38011e-11	1.00574e-11	CD74/HLA-DQB1/HLA-DQA1/HLA-DPA1/HLA-DPB1/HLA-DRB5/HLA-DRA/HLA-DRB1	8	CC
GO:0030669	clathrin-coated endocytic vesicle membrane	10/89	72/19550	9.67672e-13	2.01276e-11	1.46679e-11	IL7R/LDLRAP1/CD74/HLA-DQB1/HLA-DQA1/HLA-DPA1/HLA-DPB1/HLA-DRB5/HLA-DRA/HLA-DRB1	10	CC
GO:0098576	lumenal side of membrane	8/89	36/19550	3.64684e-12	6.32119e-11	4.60654e-11	CD74/HLA-DQB1/HLA-DQA1/HLA-DPA1/HLA-DPB1/HLA-DRB5/HLA-DRA/HLA-DRB1	8	CC
GO:0019884	antigen processing and presentation of exogenous antigen	9/88	47/18723	8.66313e-13	1.01629e-10	7.20977e-11	CD74/HLA-DMA/HLA-DQB1/HLA-DQA1/HLA-DPA1/HLA-DPB1/HLA-DRB5/HLA-DRA/HLA-DRB1	9	BP
GO:0002381	immunoglobulin production involved in immunoglobulin-mediated immune response	10/88	70/18723	9.79653e-13	1.08165e-10	7.67344e-11	CD28/TNFSF4/HLA-DMA/HLA-DQB1/HLA-DQA1/HLA-DPA1/HLA-DPB1/HLA-DRB5/HLA-DRA/HLA-DRB1	10	BP
GO:0045334	clathrin-coated endocytic vesicle	10/89	91/19550	1.08137e-11	1.60661e-10	1.17081e-10	IL7R/LDLRAP1/CD74/HLA-DQB1/HLA-DQA1/HLA-DPA1/HLA-DPB1/HLA-DRB5/HLA-DRA/HLA-DRB1	10	CC
GO:0045619	regulation of lymphocyte differentiation	13/88	174/18723	1.60909e-12	1.67792e-10	1.19035e-10	IL7R/LEF1/CD28/TCF7/TNFSF4/ID2/CD74/ZNF683/CRTAM/LAG3/IFNG/HLA-DRA/HLA-DRB1	13	BP
GO:0045580	regulation of T cell differentiation	12/88	146/18723	3.95472e-12	3.90685e-10	2.77159e-10	IL7R/LEF1/CD28/TCF7/TNFSF4/CD74/ZNF683/CRTAM/LAG3/IFNG/HLA-DRA/HLA-DRB1	12	BP
GO:0002285	lymphocyte activation involved in immune response	13/88	194/18723	6.44668e-12	6.05021e-10	4.29213e-10	GPR183/LEF1/CD28/TNFSF4/RAB27A/CD244/CD74/ZNF683/EOMES/IFNG/HAVCR2/HLA-DRA/HLA-DRB1	13	BP
GO:0048002	antigen processing and presentation of peptide antigen	9/88	62/18723	1.21812e-11	1.08877e-09	7.72395e-10	CD74/HLA-DMA/HLA-DQB1/HLA-DQA1/HLA-DPA1/HLA-DPB1/HLA-DRB5/HLA-DRA/HLA-DRB1	9	BP
GO:0030665	clathrin-coated vesicle membrane	10/89	116/19550	1.25165e-10	1.62714e-09	1.18577e-09	IL7R/LDLRAP1/CD74/HLA-DQB1/HLA-DQA1/HLA-DPA1/HLA-DPB1/HLA-DRB5/HLA-DRA/HLA-DRB1	10	CC
GO:0070374	positive regulation of ERK1 and ERK2 cascade	13/88	217/18723	2.65291e-11	2.26342e-09	1.60571e-09	GPR183/CCR7/PTPN22/CCL3L1/CCL3L3/CD74/F2R/CCL3/HAVCR2/CCL4L1/HLA-DRB1/CCL4/CCL5	13	BP
GO:0042267	natural killer cell mediated cytotoxicity	9/88	68/18723	2.89221e-11	2.3603e-09	1.67444e-09	RAB27A/SH2D1A/CRTAM/LYST/LAG3/SLAMF7/HAVCR2/KLRD1/GZMB	9	BP
GO:0031341	regulation of cell killing	10/88	99/18723	3.44571e-11	2.69483e-09	1.91177e-09	IL7R/SH2D1A/CRTAM/LAG3/IFNG/HAVCR2/KLRD1/PRF1/HLA-DRA/HLA-DRB1	10	BP
GO:0002366	leukocyte activation involved in immune response	14/88	275/18723	3.80812e-11	2.85914e-09	2.02833e-09	GPR183/LEF1/CD28/TNFSF4/RAB27A/CD244/CD74/ZNF683/EOMES/IFNG/CCL3/HAVCR2/HLA-DRA/HLA-DRB1	14	BP
GO:0002228	natural killer cell mediated immunity	9/88	71/18723	4.32116e-11	3.09363e-09	2.19468e-09	RAB27A/SH2D1A/CRTAM/LYST/LAG3/SLAMF7/HAVCR2/KLRD1/GZMB	9	BP
GO:0002263	cell activation involved in immune response	14/88	279/18723	4.6149e-11	3.09363e-09	2.19468e-09	GPR183/LEF1/CD28/TNFSF4/RAB27A/CD244/CD74/ZNF683/EOMES/IFNG/CCL3/HAVCR2/HLA-DRA/HLA-DRB1	14	BP
GO:1902105	regulation of leukocyte differentiation	14/88	279/18723	4.6149e-11	3.09363e-09	2.19468e-09	IL7R/LEF1/CD28/TCF7/TNFSF4/ID2/CD74/ZNF683/CRTAM/LAG3/IFNG/CCL3/HLA-DRA/HLA-DRB1	14	BP
GO:0030593	neutrophil chemotaxis	10/88	103/18723	5.13899e-11	3.32617e-09	2.35965e-09	CCR7/CCL3L1/CCL3L3/CD74/ITGA1/CXCL13/CCL3/CCL4L1/CCL4/CCL5	10	BP
GO:0012507	ER to Golgi transport vesicle membrane	8/89	62/19550	3.70189e-10	4.27774e-09	3.11738e-09	CD74/HLA-DQB1/HLA-DQA1/HLA-DPA1/HLA-DPB1/HLA-DRB5/HLA-DRA/HLA-DRB1	8	CC
GO:0046651	lymphocyte proliferation	14/88	288/18723	7.03376e-11	4.40079e-09	3.122e-09	IL7R/GPR183/LEF1/CD28/PTPN22/TNFSF4/CD74/CRTAM/VCAM1/HLA-DPA1/HLA-DPB1/HAVCR2/HLA-DRB1/CCL5	14	BP
GO:0030134	COPII-coated ER to Golgi transport vesicle	9/89	94/19550	4.30466e-10	4.47685e-09	3.26248e-09	CTSC/CD74/HLA-DQB1/HLA-DQA1/HLA-DPA1/HLA-DPB1/HLA-DRB5/HLA-DRA/HLA-DRB1	9	CC
GO:0032943	mononuclear cell proliferation	14/88	291/18723	8.0685e-11	4.88534e-09	3.46576e-09	IL7R/GPR183/LEF1/CD28/PTPN22/TNFSF4/CD74/CRTAM/VCAM1/HLA-DPA1/HLA-DPB1/HAVCR2/HLA-DRB1/CCL5	14	BP
GO:0002286	T cell activation involved in immune response	10/88	114/18723	1.42182e-10	8.33985e-09	5.91645e-09	GPR183/LEF1/TNFSF4/RAB27A/CD74/EOMES/IFNG/HAVCR2/HLA-DRA/HLA-DRB1	10	BP
GO:0046631	alpha-beta T cell activation	11/88	156/18723	1.73664e-10	9.87779e-09	7.00749e-09	GPR183/LEF1/CD28/PTPN22/TNFSF4/ZNF683/EOMES/CRTAM/IFNG/HLA-DRA/HLA-DRB1	11	BP
GO:0001772	immunological synapse	7/89	44/19550	1.06524e-09	1.00714e-08	7.33947e-09	CD28/CRTAM/HAVCR2/HLA-DRA/HLA-DRB1/GZMA/GZMB	7	CC
GO:0072676	lymphocyte migration	10/88	117/18723	1.84226e-10	1.01704e-08	7.21506e-09	GPR183/CCR7/CCL3L1/CCL3L3/CRTAM/CXCL13/CCL3/CCL4L1/CCL4/CCL5	10	BP
GO:0030136	clathrin-coated vesicle	11/89	196/19550	1.43463e-09	1.24334e-08	9.06081e-09	IL7R/LDLRAP1/RAB27A/CD74/HLA-DQB1/HLA-DQA1/HLA-DPA1/HLA-DPB1/HLA-DRB5/HLA-DRA/HLA-DRB1	11	CC
GO:1990266	neutrophil migration	10/88	122/18723	2.79296e-10	1.49783e-08	1.06259e-08	CCR7/CCL3L1/CCL3L3/CD74/ITGA1/CXCL13/CCL3/CCL4L1/CCL4/CCL5	10	BP
GO:0070098	chemokine-mediated signaling pathway	9/88	88/18723	3.10726e-10	1.62009e-08	1.14932e-08	CCR7/CCL3L1/CCL3L3/CXCR6/CXCL13/CCL3/CCL4L1/CCL4/CCL5	9	BP
GO:0071621	granulocyte chemotaxis	10/88	125/18723	3.55357e-10	1.80272e-08	1.27888e-08	CCR7/CCL3L1/CCL3L3/CD74/ITGA1/CXCL13/CCL3/CCL4L1/CCL4/CCL5	10	BP
GO:0042605	peptide antigen binding	7/89	36/18368	3.67277e-10	2.27712e-08	1.70107e-08	HLA-DQB1/HLA-DQA1/HLA-DPA1/HLA-DPB1/HLA-DRB5/HLA-DRA/HLA-DRB1	7	MF
GO:0031343	positive regulation of cell killing	8/88	63/18723	5.39915e-10	2.66689e-08	1.89194e-08	SH2D1A/CRTAM/LAG3/IFNG/KLRD1/PRF1/HLA-DRA/HLA-DRB1	8	BP
GO:0032395	MHC class II receptor activity	5/89	10/18368	5.89311e-10	2.7403e-08	2.04708e-08	HLA-DQB1/HLA-DQA1/HLA-DPA1/HLA-DRA/HLA-DRB1	5	MF
GO:0048247	lymphocyte chemotaxis	8/88	64/18723	6.14701e-10	2.918e-08	2.07008e-08	GPR183/CCL3L1/CCL3L3/CXCL13/CCL3/CCL4L1/CCL4/CCL5	8	BP
GO:0050670	regulation of lymphocyte proliferation	12/88	225/18723	6.21843e-10	2.918e-08	2.07008e-08	GPR183/CD28/PTPN22/TNFSF4/CD74/CRTAM/VCAM1/HLA-DPA1/HLA-DPB1/HAVCR2/HLA-DRB1/CCL5	12	BP
GO:0032944	regulation of mononuclear cell proliferation	12/88	227/18723	6.88149e-10	3.15038e-08	2.23494e-08	GPR183/CD28/PTPN22/TNFSF4/CD74/CRTAM/VCAM1/HLA-DPA1/HLA-DPB1/HAVCR2/HLA-DRB1/CCL5	12	BP
GO:1990868	response to chemokine	9/88	97/18723	7.51038e-10	3.27837e-08	2.32573e-08	CCR7/CCL3L1/CCL3L3/CXCR6/CXCL13/CCL3/CCL4L1/CCL4/CCL5	9	BP
GO:1990869	cellular response to chemokine	9/88	97/18723	7.51038e-10	3.27837e-08	2.32573e-08	CCR7/CCL3L1/CCL3L3/CXCR6/CXCL13/CCL3/CCL4L1/CCL4/CCL5	9	BP
GO:0030595	leukocyte chemotaxis	12/88	230/18723	7.9963e-10	3.41115e-08	2.41993e-08	GPR183/CCR7/CCL3L1/CCL3L3/CD74/ITGA1/LYST/CXCL13/CCL3/CCL4L1/CCL4/CCL5	12	BP
GO:0050671	positive regulation of lymphocyte proliferation	10/88	137/18723	8.77695e-10	3.66096e-08	2.59715e-08	GPR183/CD28/PTPN22/TNFSF4/CD74/VCAM1/HLA-DPA1/HLA-DPB1/HAVCR2/CCL5	10	BP
GO:0032946	positive regulation of mononuclear cell proliferation	10/88	138/18723	9.42672e-10	3.84651e-08	2.72879e-08	GPR183/CD28/PTPN22/TNFSF4/CD74/VCAM1/HLA-DPA1/HLA-DPB1/HAVCR2/CCL5	10	BP
GO:0002699	positive regulation of immune effector process	12/88	235/18723	1.02214e-09	4.08202e-08	2.89586e-08	CD28/PTPN22/TNFSF4/CD244/CD74/SH2D1A/CRTAM/LAG3/IFNG/KLRD1/HLA-DRA/HLA-DRB1	12	BP
GO:0034341	response to interferon-gamma	10/88	141/18723	1.16402e-09	4.55181e-08	3.22914e-08	CCL3L1/CCL3L3/CD74/FASLG/IFNG/CCL3/HLA-DPA1/CCL4L1/CCL4/CCL5	10	BP
GO:0070663	regulation of leukocyte proliferation	12/88	245/18723	1.64218e-09	6.29056e-08	4.46264e-08	GPR183/CD28/PTPN22/TNFSF4/CD74/CRTAM/VCAM1/HLA-DPA1/HLA-DPB1/HAVCR2/HLA-DRB1/CCL5	12	BP
GO:0097530	granulocyte migration	10/88	148/18723	1.8693e-09	7.01736e-08	4.97825e-08	CCR7/CCL3L1/CCL3L3/CD74/ITGA1/CXCL13/CCL3/CCL4L1/CCL4/CCL5	10	BP
GO:0140375	immune receptor activity	10/89	144/18368	1.91955e-09	7.14074e-08	5.33434e-08	IL7R/CCR7/CXCR6/CD74/HLA-DQB1/HLA-DQA1/HLA-DPA1/KLRD1/HLA-DRA/HLA-DRB1	10	MF
GO:0070665	positive regulation of leukocyte proliferation	10/88	150/18723	2.13064e-09	7.72593e-08	5.48092e-08	GPR183/CD28/PTPN22/TNFSF4/CD74/VCAM1/HLA-DPA1/HLA-DPB1/HAVCR2/CCL5	10	BP
GO:0002456	T cell mediated immunity	9/88	109/18723	2.14037e-09	7.72593e-08	5.48092e-08	IL7R/TNFSF4/RAB27A/CTSC/KLRD1/PRF1/HLA-DRA/HLA-DRB1/CD8A	9	BP
GO:0030662	coated vesicle membrane	10/89	181/19550	9.74741e-09	7.79793e-08	5.6827e-08	IL7R/LDLRAP1/CD74/HLA-DQB1/HLA-DQA1/HLA-DPA1/HLA-DPB1/HLA-DRB5/HLA-DRA/HLA-DRB1	10	CC
GO:0030135	coated vesicle	12/89	299/19550	1.09198e-08	8.11188e-08	5.91149e-08	IL7R/LDLRAP1/RAB27A/CTSC/CD74/HLA-DQB1/HLA-DQA1/HLA-DPA1/HLA-DPB1/HLA-DRB5/HLA-DRA/HLA-DRB1	12	CC
GO:0032609	interferon-gamma production	9/88	112/18723	2.7271e-09	9.47919e-08	6.72472e-08	CCR7/PTPN22/TNFSF4/CD244/CRTAM/HLA-DPA1/HLA-DPB1/HAVCR2/HLA-DRB1	9	BP
GO:0032649	regulation of interferon-gamma production	9/88	112/18723	2.7271e-09	9.47919e-08	6.72472e-08	CCR7/PTPN22/TNFSF4/CD244/CRTAM/HLA-DPA1/HLA-DPB1/HAVCR2/HLA-DRB1	9	BP
GO:0048020	CCR chemokine receptor binding	7/89	48/18368	3.09088e-09	9.54431e-08	7.12987e-08	CCL3L1/CCL3L3/CXCL13/CCL3/CCL4L1/CCL4/CCL5	7	MF
GO:0008009	chemokine activity	7/89	49/18368	3.59194e-09	9.54431e-08	7.12987e-08	CCL3L1/CCL3L3/CXCL13/CCL3/CCL4L1/CCL4/CCL5	7	MF
GO:0001913	T cell mediated cytotoxicity	7/88	49/18723	2.90911e-09	9.928e-08	7.04311e-08	IL7R/RAB27A/CTSC/KLRD1/PRF1/HLA-DRA/HLA-DRB1	7	BP
GO:0045589	regulation of regulatory T cell differentiation	6/88	28/18723	3.14398e-09	1.05379e-07	7.47581e-08	CD28/TNFSF4/LAG3/IFNG/HLA-DRA/HLA-DRB1	6	BP
GO:0016064	immunoglobulin mediated immune response	11/88	207/18723	3.51786e-09	1.15843e-07	8.21809e-08	CD28/TNFSF4/CD74/HLA-DMA/HLA-DQB1/HLA-DQA1/HLA-DPA1/HLA-DPB1/HLA-DRB5/HLA-DRA/HLA-DRB1	11	BP
GO:0032588	trans-Golgi network membrane	8/89	100/19550	1.77082e-08	1.17031e-07	8.52858e-08	CD74/HLA-DQB1/HLA-DQA1/HLA-DPA1/HLA-DPB1/HLA-DRB5/HLA-DRA/HLA-DRB1	8	CC
GO:0030666	endocytic vesicle membrane	10/89	193/19550	1.80048e-08	1.17031e-07	8.52858e-08	IL7R/LDLRAP1/CD74/HLA-DQB1/HLA-DQA1/HLA-DPA1/HLA-DPB1/HLA-DRB5/HLA-DRA/HLA-DRB1	10	CC
GO:0019724	B cell mediated immunity	11/88	210/18723	4.09052e-09	1.32378e-07	9.39112e-08	CD28/TNFSF4/CD74/HLA-DMA/HLA-DQB1/HLA-DQA1/HLA-DPA1/HLA-DPB1/HLA-DRB5/HLA-DRA/HLA-DRB1	11	BP
GO:0071346	cellular response to interferon-gamma	9/88	118/18723	4.33728e-09	1.37984e-07	9.78886e-08	CCL3L1/CCL3L3/FASLG/IFNG/CCL3/HLA-DPA1/CCL4L1/CCL4/CCL5	9	BP
GO:0001910	regulation of leukocyte mediated cytotoxicity	8/88	82/18723	4.62204e-09	1.44593e-07	1.02577e-07	IL7R/SH2D1A/CRTAM/LAG3/HAVCR2/KLRD1/HLA-DRA/HLA-DRB1	8	BP
GO:0045066	regulatory T cell differentiation	6/88	31/18723	6.07552e-09	1.86947e-07	1.32624e-07	CD28/TNFSF4/LAG3/IFNG/HLA-DRA/HLA-DRB1	6	BP
GO:0002706	regulation of lymphocyte mediated immunity	10/88	168/18723	6.38977e-09	1.93445e-07	1.37234e-07	IL7R/CD28/TNFSF4/SH2D1A/CRTAM/LAG3/HAVCR2/KLRD1/HLA-DRA/HLA-DRB1	10	BP
GO:0031349	positive regulation of defense response	12/88	278/18723	6.8249e-09	2.03339e-07	1.44252e-07	CCR7/CD28/TNFSF4/CTSC/SH2D1A/CRTAM/LAG3/IFNG/CCL3/HAVCR2/KLRD1/CCL5	12	BP
GO:0042129	regulation of T cell proliferation	10/88	171/18723	7.57732e-09	2.22229e-07	1.57653e-07	CD28/PTPN22/TNFSF4/CRTAM/VCAM1/HLA-DPA1/HLA-DPB1/HAVCR2/HLA-DRB1/CCL5	10	BP
GO:0003823	antigen binding	10/89	171/18368	1.01346e-08	2.3563e-07	1.76022e-07	IL7R/LAG3/HLA-DQB1/HLA-DQA1/HLA-DPA1/HLA-DPB1/KLRD1/HLA-DRB5/HLA-DRA/HLA-DRB1	10	MF
GO:0005125	cytokine activity	11/89	235/18368	1.80773e-08	3.73598e-07	2.79088e-07	LTB/TNFSF4/CCL3L1/CCL3L3/FASLG/IFNG/CXCL13/CCL3/CCL4L1/CCL4/CCL5	11	MF
GO:0042287	MHC protein binding	6/89	40/18368	3.66801e-08	6.82251e-07	5.09661e-07	FCRL6/CD244/CD74/LAG3/KLRD1/CD8A	6	MF
GO:0042102	positive regulation of T cell proliferation	8/88	101/18723	2.43795e-08	7.04004e-07	4.99434e-07	CD28/PTPN22/TNFSF4/VCAM1/HLA-DPA1/HLA-DPB1/HAVCR2/CCL5	8	BP
GO:0071674	mononuclear cell migration	10/88	196/18723	2.79183e-08	7.93979e-07	5.63264e-07	GPR183/CCR7/CCL3L1/CCL3L3/CRTAM/CXCL13/CCL3/CCL4L1/CCL4/CCL5	10	BP
GO:0046634	regulation of alpha-beta T cell activation	8/88	104/18723	3.07194e-08	8.60602e-07	6.10527e-07	CD28/PTPN22/TNFSF4/ZNF683/CRTAM/IFNG/HLA-DRA/HLA-DRB1	8	BP
GO:0042098	T cell proliferation	10/88	199/18723	3.22442e-08	8.90035e-07	6.31407e-07	CD28/PTPN22/TNFSF4/CRTAM/VCAM1/HLA-DPA1/HLA-DPB1/HAVCR2/HLA-DRB1/CCL5	10	BP
GO:0002287	alpha-beta T cell activation involved in immune response	7/88	69/18723	3.38699e-08	9.08196e-07	6.44291e-07	GPR183/LEF1/TNFSF4/EOMES/IFNG/HLA-DRA/HLA-DRB1	7	BP
GO:0002293	alpha-beta T cell differentiation involved in immune response	7/88	69/18723	3.38699e-08	9.08196e-07	6.44291e-07	GPR183/LEF1/TNFSF4/EOMES/IFNG/HLA-DRA/HLA-DRB1	7	BP
GO:0042379	chemokine receptor binding	7/89	72/18368	5.62977e-08	9.51942e-07	7.11128e-07	CCL3L1/CCL3L3/CXCL13/CCL3/CCL4L1/CCL4/CCL5	7	MF
GO:0005126	cytokine receptor binding	11/89	271/18368	7.77352e-08	1.2049e-06	9.00092e-07	LTB/TNFSF4/CCL3L1/CCL3L3/FASLG/IFNG/CXCL13/CCL3/CCL4L1/CCL4/CCL5	11	MF
GO:0032729	positive regulation of interferon-gamma production	7/88	72/18723	4.57225e-08	1.20875e-06	8.57508e-07	PTPN22/TNFSF4/CD244/CRTAM/HLA-DPA1/HLA-DPB1/HAVCR2	7	BP
GO:0046632	alpha-beta T cell differentiation	8/88	112/18723	5.5008e-08	1.43403e-06	1.01733e-06	GPR183/LEF1/TNFSF4/ZNF683/EOMES/IFNG/HLA-DRA/HLA-DRB1	8	BP
GO:0002708	positive regulation of lymphocyte mediated immunity	8/88	113/18723	5.89742e-08	1.51636e-06	1.07574e-06	CD28/TNFSF4/SH2D1A/CRTAM/LAG3/KLRD1/HLA-DRA/HLA-DRB1	8	BP
GO:0002292	T cell differentiation involved in immune response	7/88	75/18723	6.09087e-08	1.54494e-06	1.09601e-06	GPR183/LEF1/TNFSF4/EOMES/IFNG/HLA-DRA/HLA-DRB1	7	BP
GO:0002377	immunoglobulin production	10/88	216/18723	6.98746e-08	1.74873e-06	1.24058e-06	CD28/TNFSF4/HLA-DMA/HLA-DQB1/HLA-DQA1/HLA-DPA1/HLA-DPB1/HLA-DRB5/HLA-DRA/HLA-DRB1	10	BP
GO:0097529	myeloid leukocyte migration	10/88	220/18723	8.30017e-08	2.04992e-06	1.45425e-06	CCR7/CCL3L1/CCL3L3/CD74/ITGA1/CXCL13/CCL3/CCL4L1/CCL4/CCL5	10	BP
GO:0002703	regulation of leukocyte mediated immunity	10/88	226/18723	1.0677e-07	2.60268e-06	1.84639e-06	IL7R/CD28/TNFSF4/SH2D1A/CRTAM/LAG3/HAVCR2/KLRD1/HLA-DRA/HLA-DRB1	10	BP
GO:0050852	T cell receptor signaling pathway	8/88	123/18723	1.14257e-07	2.7495e-06	1.95055e-06	CCR7/CD28/PTPN22/THEMIS/SH2D1A/HLA-DQB1/HLA-DPB1/HLA-DRB1	8	BP
GO:0030176	integral component of endoplasmic reticulum membrane	8/89	162/19550	7.47216e-07	4.5712e-06	3.33124e-06	CD74/HLA-DQB1/HLA-DQA1/HLA-DPA1/HLA-DPB1/HLA-DRB5/HLA-DRA/HLA-DRB1	8	CC
GO:0043383	negative T cell selection	4/88	12/18723	2.19115e-07	5.2014e-06	3.68997e-06	CCR7/CD28/THEMIS/CD74	4	BP
GO:0002705	positive regulation of leukocyte mediated immunity	8/88	134/18723	2.2169e-07	5.2014e-06	3.68997e-06	CD28/TNFSF4/SH2D1A/CRTAM/LAG3/KLRD1/HLA-DRA/HLA-DRB1	8	BP
GO:0045582	positive regulation of T cell differentiation	7/88	91/18723	2.33768e-07	5.41003e-06	3.83798e-06	IL7R/LEF1/TNFSF4/CD74/IFNG/HLA-DRA/HLA-DRB1	7	BP
GO:0002695	negative regulation of leukocyte activation	9/88	187/18723	2.36347e-07	5.41003e-06	3.83798e-06	PTPN22/TNFSF4/ID2/CD74/CRTAM/LAG3/HAVCR2/CST7/HLA-DRB1	9	BP
GO:0001912	positive regulation of leukocyte mediated cytotoxicity	6/88	56/18723	2.43895e-07	5.51556e-06	3.91284e-06	SH2D1A/CRTAM/LAG3/KLRD1/HLA-DRA/HLA-DRB1	6	BP
GO:0031227	intrinsic component of endoplasmic reticulum membrane	8/89	170/19550	1.07582e-06	6.21588e-06	4.52979e-06	CD74/HLA-DQB1/HLA-DQA1/HLA-DPA1/HLA-DPB1/HLA-DRB5/HLA-DRA/HLA-DRB1	8	CC
GO:0043547	positive regulation of GTPase activity	10/88	255/18723	3.27258e-07	7.31266e-06	5.18774e-06	CCR7/ARAP2/CCL3L1/CCL3L3/F2R/CXCL13/CCL3/CCL4L1/CCL4/CCL5	10	BP
GO:0032633	interleukin-4 production	5/88	33/18723	4.37458e-07	9.54778e-06	6.77337e-06	LEF1/CD28/TNFSF4/HAVCR2/HLA-DRB1	5	BP
GO:0032673	regulation of interleukin-4 production	5/88	33/18723	4.37458e-07	9.54778e-06	6.77337e-06	LEF1/CD28/TNFSF4/HAVCR2/HLA-DRB1	5	BP
GO:0002573	myeloid leukocyte differentiation	9/88	208/18723	5.8006e-07	1.24576e-05	8.83767e-06	GPR183/CCR7/LEF1/RBPJ/ID2/CD74/IFNG/CCL3/HLA-DRB1	9	BP
GO:0045621	positive regulation of lymphocyte differentiation	7/88	104/18723	5.84055e-07	1.24576e-05	8.83767e-06	IL7R/LEF1/TNFSF4/CD74/IFNG/HLA-DRA/HLA-DRB1	7	BP
GO:0002468	dendritic cell antigen processing and presentation	4/88	15/18723	5.97747e-07	1.26064e-05	8.94323e-06	CCR7/CD74/HLA-DRA/HLA-DRB1	4	BP
GO:0050866	negative regulation of cell activation	9/88	210/18723	6.28495e-07	1.31076e-05	9.29878e-06	PTPN22/TNFSF4/ID2/CD74/CRTAM/LAG3/HAVCR2/CST7/HLA-DRB1	9	BP
GO:0046635	positive regulation of alpha-beta T cell activation	6/88	67/18723	7.19306e-07	1.48367e-05	1.05254e-05	CD28/PTPN22/TNFSF4/IFNG/HLA-DRA/HLA-DRB1	6	BP
GO:0051250	negative regulation of lymphocyte activation	8/88	157/18723	7.44496e-07	1.48662e-05	1.05463e-05	PTPN22/TNFSF4/ID2/CD74/CRTAM/LAG3/HAVCR2/HLA-DRB1	8	BP
GO:1902107	positive regulation of leukocyte differentiation	8/88	157/18723	7.44496e-07	1.48662e-05	1.05463e-05	IL7R/LEF1/TNFSF4/ID2/CD74/IFNG/HLA-DRA/HLA-DRB1	8	BP
GO:1903708	positive regulation of hemopoiesis	8/88	157/18723	7.44496e-07	1.48662e-05	1.05463e-05	IL7R/LEF1/TNFSF4/ID2/CD74/IFNG/HLA-DRA/HLA-DRB1	8	BP
GO:0002294	CD4-positive, alpha-beta T cell differentiation involved in immune response	6/88	68/18723	7.8596e-07	1.55289e-05	1.10165e-05	GPR183/LEF1/TNFSF4/IFNG/HLA-DRA/HLA-DRB1	6	BP
GO:0002548	monocyte chemotaxis	6/88	70/18723	9.34472e-07	1.82709e-05	1.29617e-05	CCL3L1/CCL3L3/CCL3/CCL4L1/CCL4/CCL5	6	BP
GO:0002347	response to tumor cell	5/88	39/18723	1.03797e-06	2.00852e-05	1.42488e-05	ABI3/CRTAM/HAVCR2/PRF1/HLA-DRB1	5	BP
GO:0002833	positive regulation of response to biotic stimulus	8/88	168/18723	1.24221e-06	2.3792e-05	1.68785e-05	SH2D1A/CRTAM/LAG3/OASL/HAVCR2/KLRD1/HLA-DRB1/CCL5	8	BP
GO:0005770	late endosome	9/89	282/19550	5.51901e-06	2.8981e-05	2.11198e-05	RAB27A/CD74/F2R/HLA-DMA/CD63/CST7/HLA-DRB5/HLA-DRA/HLA-DRB1	9	CC
GO:0030658	transport vesicle membrane	8/89	212/19550	5.57327e-06	2.8981e-05	2.11198e-05	CD74/HLA-DQB1/HLA-DQA1/HLA-DPA1/HLA-DPB1/HLA-DRB5/HLA-DRA/HLA-DRB1	8	CC
GO:0048245	eosinophil chemotaxis	4/88	19/18723	1.67313e-06	3.14046e-05	2.2279e-05	CCL3/CCL4L1/CCL4/CCL5	4	BP
GO:0140131	positive regulation of lymphocyte chemotaxis	4/88	19/18723	1.67313e-06	3.14046e-05	2.2279e-05	CXCL13/CCL3/CCL4/CCL5	4	BP
GO:0050868	negative regulation of T cell activation	7/88	122/18723	1.72024e-06	3.19692e-05	2.26795e-05	PTPN22/TNFSF4/CD74/CRTAM/LAG3/HAVCR2/HLA-DRB1	7	BP
GO:0042269	regulation of natural killer cell mediated cytotoxicity	5/88	44/18723	1.92201e-06	3.53688e-05	2.50913e-05	SH2D1A/CRTAM/LAG3/HAVCR2/KLRD1	5	BP
GO:0043367	CD4-positive, alpha-beta T cell differentiation	6/88	83/18723	2.56199e-06	4.66879e-05	3.31212e-05	GPR183/LEF1/TNFSF4/IFNG/HLA-DRA/HLA-DRB1	6	BP
GO:0002715	regulation of natural killer cell mediated immunity	5/88	48/18723	2.986e-06	5.38915e-05	3.82317e-05	SH2D1A/CRTAM/LAG3/HAVCR2/KLRD1	5	BP
GO:0030101	natural killer cell activation	6/88	88/18723	3.61009e-06	6.45346e-05	4.57821e-05	PTPN22/RAB27A/CD244/ZNF683/SLAMF7/HAVCR2	6	BP
GO:0072677	eosinophil migration	4/88	23/18723	3.76789e-06	6.672e-05	4.73324e-05	CCL3/CCL4L1/CCL4/CCL5	4	BP
GO:1903038	negative regulation of leukocyte cell-cell adhesion	7/88	141/18723	4.51627e-06	7.92246e-05	5.62034e-05	PTPN22/TNFSF4/CD74/CRTAM/LAG3/HAVCR2/HLA-DRB1	7	BP
GO:0002690	positive regulation of leukocyte chemotaxis	6/88	94/18723	5.30321e-06	9.20281e-05	6.52864e-05	CCR7/CD74/CXCL13/CCL3/CCL4/CCL5	6	BP
GO:1901623	regulation of lymphocyte chemotaxis	4/88	25/18723	5.3442e-06	9.20281e-05	6.52864e-05	CXCL13/CCL3/CCL4/CCL5	4	BP
GO:0006968	cellular defense response	5/88	54/18723	5.39413e-06	9.20435e-05	6.52974e-05	FCMR/KLRG1/SH2D1A/GNLY/PRF1	5	BP
GO:1903900	regulation of viral life cycle	7/88	148/18723	6.21905e-06	0.000104535	7.41589e-05	CD28/CD74/OASL/APOBEC3C/APOBEC3G/HLA-DRB1/CCL5	7	BP
GO:0002418	immune response to tumor cell	4/88	26/18723	6.29325e-06	0.000104535	7.41589e-05	CRTAM/HAVCR2/PRF1/HLA-DRB1	4	BP
GO:0045954	positive regulation of natural killer cell mediated cytotoxicity	4/88	26/18723	6.29325e-06	0.000104535	7.41589e-05	SH2D1A/CRTAM/LAG3/KLRD1	4	BP
GO:0005802	trans-Golgi network	8/89	259/19550	2.38337e-05	0.000118033	8.60163e-05	CD74/HLA-DQB1/HLA-DQA1/HLA-DPA1/HLA-DPB1/HLA-DRB5/HLA-DRA/HLA-DRB1	8	CC
GO:0002763	positive regulation of myeloid leukocyte differentiation	5/88	58/18723	7.70096e-06	0.000126796	8.99512e-05	LEF1/ID2/CD74/IFNG/HLA-DRB1	5	BP
GO:0035710	CD4-positive, alpha-beta T cell activation	6/88	102/18723	8.51121e-06	0.000138467	9.82314e-05	GPR183/LEF1/TNFSF4/IFNG/HLA-DRA/HLA-DRB1	6	BP
GO:0010818	T cell chemotaxis	4/88	28/18723	8.55739e-06	0.000138467	9.82314e-05	GPR183/CXCL13/CCL3/CCL5	4	BP
GO:0002429	immune response-activating cell surface receptor signaling pathway	9/88	291/18723	9.12996e-06	0.000145228	0.000103028	CCR7/CD28/PTPN22/THEMIS/SH2D1A/HLA-DQB1/HLA-DPB1/KLRD1/HLA-DRB1	9	BP
GO:0002757	immune response-activating signal transduction	9/88	291/18723	9.12996e-06	0.000145228	0.000103028	CCR7/CD28/PTPN22/THEMIS/SH2D1A/HLA-DQB1/HLA-DPB1/KLRD1/HLA-DRB1	9	BP
GO:0043030	regulation of macrophage activation	5/88	61/18723	9.88841e-06	0.000155971	0.000110649	CTSC/CD74/CCL3/HAVCR2/CST7	5	BP
GO:0002274	myeloid leukocyte activation	8/88	223/18723	1.01301e-05	0.000158451	0.000112408	RBPJ/CTSC/CD74/IFNG/CCL3/HAVCR2/CST7/CCL5	8	BP
GO:0035821	modulation of process of other organism	6/88	106/18723	1.06221e-05	0.000162095	0.000114993	LEF1/IFNG/CCL3/PRF1/CCL4/CCL5	6	BP
GO:0042116	macrophage activation	6/88	106/18723	1.06221e-05	0.000162095	0.000114993	CTSC/CD74/IFNG/CCL3/HAVCR2/CST7	6	BP
GO:0071887	leukocyte apoptotic process	6/88	106/18723	1.06221e-05	0.000162095	0.000114993	IL7R/CCR7/PDCD1/CD74/FASLG/CCL5	6	BP
GO:0035747	natural killer cell chemotaxis	3/88	10/18723	1.1756e-05	0.000177952	0.000126242	CCL3/CCL4/CCL5	3	BP
GO:0050792	regulation of viral process	7/88	164/18723	1.21811e-05	0.000182911	0.00012976	CD28/CD74/OASL/APOBEC3C/APOBEC3G/HLA-DRB1/CCL5	7	BP
GO:0002717	positive regulation of natural killer cell mediated immunity	4/88	31/18723	1.30098e-05	0.000193805	0.000137489	SH2D1A/CRTAM/LAG3/KLRD1	4	BP
GO:0071677	positive regulation of mononuclear cell migration	5/88	65/18723	1.35281e-05	0.00019994	0.000141841	CCR7/CXCL13/CCL3/CCL4/CCL5	5	BP
GO:0002822	regulation of adaptive immune response based on somatic recombination of immune receptors built from immunoglobulin superfamily domains	7/88	168/18723	1.42472e-05	0.000208922	0.000148213	IL7R/CD28/TNFSF4/HAVCR2/KLRD1/HLA-DRA/HLA-DRB1	7	BP
GO:0042093	T-helper cell differentiation	5/88	66/18723	1.45831e-05	0.00021219	0.000150532	GPR183/LEF1/TNFSF4/HLA-DRA/HLA-DRB1	5	BP
GO:0019835	cytolysis	4/88	32/18723	1.48152e-05	0.000212275	0.000150592	PRF1/GZMA/GZMB/GZMH	4	BP
GO:0043372	positive regulation of CD4-positive, alpha-beta T cell differentiation	4/88	32/18723	1.48152e-05	0.000212275	0.000150592	TNFSF4/IFNG/HLA-DRA/HLA-DRB1	4	BP
GO:0071347	cellular response to interleukin-1	6/88	113/18723	1.53247e-05	0.000217912	0.000154591	CCL3L1/CCL3L3/CCL3/CCL4L1/CCL4/CCL5	6	BP
GO:0045060	negative thymic T cell selection	3/88	11/18723	1.61095e-05	0.000227351	0.000161287	CCR7/CD28/CD74	3	BP
GO:0046637	regulation of alpha-beta T cell differentiation	5/88	68/18723	1.68849e-05	0.000236515	0.000167788	TNFSF4/ZNF683/IFNG/HLA-DRA/HLA-DRB1	5	BP
GO:0050851	antigen receptor-mediated signaling pathway	8/88	240/18723	1.72477e-05	0.000239807	0.000170123	CCR7/CD28/PTPN22/THEMIS/SH2D1A/HLA-DQB1/HLA-DPB1/HLA-DRB1	8	BP
GO:0031902	late endosome membrane	6/89	146/19550	5.4631e-05	0.000258256	0.000188203	RAB27A/HLA-DMA/CD63/HLA-DRB5/HLA-DRA/HLA-DRB1	6	CC
GO:2000403	positive regulation of lymphocyte migration	4/88	35/18723	2.1341e-05	0.000293283	0.00020806	CXCL13/CCL3/CCL4/CCL5	4	BP
GO:0043380	regulation of memory T cell differentiation	3/88	12/18723	2.14064e-05	0.000293283	0.00020806	TNFSF4/HLA-DRA/HLA-DRB1	3	BP
GO:0002761	regulation of myeloid leukocyte differentiation	6/88	120/18723	2.15818e-05	0.000293544	0.000208245	LEF1/ID2/CD74/IFNG/CCL3/HLA-DRB1	6	BP
GO:0070227	lymphocyte apoptotic process	5/88	72/18723	2.23316e-05	0.000301557	0.00021393	IL7R/PDCD1/CD74/FASLG/CCL5	5	BP
GO:0002688	regulation of leukocyte chemotaxis	6/88	122/18723	2.37041e-05	0.000317804	0.000225456	CCR7/CD74/CXCL13/CCL3/CCL4/CCL5	6	BP
GO:0002819	regulation of adaptive immune response	7/88	183/18723	2.47538e-05	0.000329524	0.00023377	IL7R/CD28/TNFSF4/HAVCR2/KLRD1/HLA-DRA/HLA-DRB1	7	BP
GO:0043379	memory T cell differentiation	3/88	13/18723	2.77337e-05	0.000366592	0.000260067	TNFSF4/HLA-DRA/HLA-DRB1	3	BP
GO:0001914	regulation of T cell mediated cytotoxicity	4/88	39/18723	3.3047e-05	0.000430758	0.000305588	IL7R/KLRD1/HLA-DRA/HLA-DRB1	4	BP
GO:2000516	positive regulation of CD4-positive, alpha-beta T cell activation	4/88	39/18723	3.3047e-05	0.000430758	0.000305588	TNFSF4/IFNG/HLA-DRA/HLA-DRB1	4	BP
GO:0051607	defense response to virus	8/88	265/18723	3.50426e-05	0.00044047	0.000312477	SERINC5/PTPN22/LYST/OASL/APOBEC3C/IFNG/APOBEC3G/PRF1	8	BP
GO:0140546	defense response to symbiont	8/88	265/18723	3.50426e-05	0.00044047	0.000312477	SERINC5/PTPN22/LYST/OASL/APOBEC3C/IFNG/APOBEC3G/PRF1	8	BP
GO:0001771	immunological synapse formation	3/88	14/18723	3.51774e-05	0.00044047	0.000312477	CCR7/HAVCR2/PRF1	3	BP
GO:0043922	negative regulation by host of viral transcription	3/88	14/18723	3.51774e-05	0.00044047	0.000312477	CCL3/CCL4/CCL5	3	BP
GO:0090715	immunological memory formation process	3/88	14/18723	3.51774e-05	0.00044047	0.000312477	TNFSF4/HLA-DRA/HLA-DRB1	3	BP
GO:0019079	viral genome replication	6/88	131/18723	3.54347e-05	0.00044047	0.000312477	CD28/CXCR6/OASL/APOBEC3C/APOBEC3G/CCL5	6	BP
GO:0045089	positive regulation of innate immune response	6/88	131/18723	3.54347e-05	0.00044047	0.000312477	SH2D1A/CRTAM/LAG3/HAVCR2/KLRD1/CCL5	6	BP
GO:0022408	negative regulation of cell-cell adhesion	7/88	196/18723	3.8398e-05	0.000474164	0.000336381	PTPN22/TNFSF4/CD74/CRTAM/LAG3/HAVCR2/HLA-DRB1	7	BP
GO:2000106	regulation of leukocyte apoptotic process	5/88	81/18723	3.956e-05	0.000485321	0.000344296	IL7R/CCR7/PDCD1/CD74/CCL5	5	BP
GO:0032735	positive regulation of interleukin-12 production	4/88	41/18723	4.0398e-05	0.000492383	0.000349306	LTB/CCR7/TNFSF4/IFNG	4	BP
GO:0002687	positive regulation of leukocyte migration	6/88	135/18723	4.19578e-05	0.000508096	0.000360453	CCR7/CD74/CXCL13/CCL3/CCL4/CCL5	6	BP
GO:0042088	T-helper 1 type immune response	4/88	43/18723	4.88785e-05	0.000588109	0.000417215	LEF1/TNFSF4/HAVCR2/HLA-DRB1	4	BP
GO:0002709	regulation of T cell mediated immunity	5/88	85/18723	4.99051e-05	0.00059286	0.000420586	IL7R/TNFSF4/KLRD1/HLA-DRA/HLA-DRB1	5	BP
GO:0045069	regulation of viral genome replication	5/88	85/18723	4.99051e-05	0.00059286	0.000420586	CD28/OASL/APOBEC3C/APOBEC3G/CCL5	5	BP
GO:0050921	positive regulation of chemotaxis	6/88	141/18723	5.35154e-05	0.000628492	0.000445864	CCR7/CD74/CXCL13/CCL3/CCL4/CCL5	6	BP
GO:0150076	neuroinflammatory response	4/88	44/18723	5.35741e-05	0.000628492	0.000445864	CTSC/IFNG/CCL3/CST7	4	BP
GO:0050729	positive regulation of inflammatory response	6/88	142/18723	5.56676e-05	0.000648994	0.000460408	CCR7/CD28/TNFSF4/CTSC/IFNG/CCL3	6	BP
GO:0071222	cellular response to lipopolysaccharide	7/88	209/18723	5.76969e-05	0.000666605	0.000472902	PTPN22/TNFSF4/TNIP3/CXCL13/CCL3/HAVCR2/CCL5	7	BP
GO:0070555	response to interleukin-1	6/88	143/18723	5.78885e-05	0.000666605	0.000472902	CCL3L1/CCL3L3/CCL3/CCL4L1/CCL4/CCL5	6	BP
GO:2000107	negative regulation of leukocyte apoptotic process	4/88	46/18723	6.39414e-05	0.000731818	0.000519165	IL7R/CCR7/CD74/CCL5	4	BP
GO:0045591	positive regulation of regulatory T cell differentiation	3/88	17/18723	6.50484e-05	0.000735517	0.00052179	IFNG/HLA-DRA/HLA-DRB1	3	BP
GO:0090713	immunological memory process	3/88	17/18723	6.50484e-05	0.000735517	0.00052179	TNFSF4/HLA-DRA/HLA-DRB1	3	BP
GO:0001774	microglial cell activation	4/88	47/18723	6.96397e-05	0.000782717	0.000555274	CTSC/IFNG/CCL3/CST7	4	BP
GO:0045088	regulation of innate immune response	7/88	218/18723	7.52297e-05	0.000840513	0.000596276	PTPN22/SH2D1A/CRTAM/LAG3/HAVCR2/KLRD1/CCL5	7	BP
GO:0002544	chronic inflammatory response	3/88	18/18723	7.7793e-05	0.000864008	0.000612944	VCAM1/CXCL13/CCL5	3	BP
GO:0071219	cellular response to molecule of bacterial origin	7/88	221/18723	8.19588e-05	0.000904922	0.000641968	PTPN22/TNFSF4/TNIP3/CXCL13/CCL3/HAVCR2/CCL5	7	BP
GO:0005771	multivesicular body	4/89	64/19550	0.000206985	0.000935932	0.000682056	RAB27A/CD74/CD63/CST7	4	CC
GO:0050920	regulation of chemotaxis	7/88	223/18723	8.67119e-05	0.000951803	0.000675227	GPR183/CCR7/CD74/CXCL13/CCL3/CCL4/CCL5	7	BP
GO:0019083	viral transcription	4/88	50/18723	8.89566e-05	0.000954123	0.000676873	LEF1/CCL3/CCL4/CCL5	4	BP
GO:0045058	T cell selection	4/88	50/18723	8.89566e-05	0.000954123	0.000676873	CCR7/CD28/THEMIS/CD74	4	BP
GO:0046638	positive regulation of alpha-beta T cell differentiation	4/88	50/18723	8.89566e-05	0.000954123	0.000676873	TNFSF4/IFNG/HLA-DRA/HLA-DRB1	4	BP
GO:0070231	T cell apoptotic process	4/88	50/18723	8.89566e-05	0.000954123	0.000676873	IL7R/PDCD1/FASLG/CCL5	4	BP
GO:1903975	regulation of glial cell migration	3/88	19/18723	9.20655e-05	0.00097631	0.000692613	GPR183/IDH2/CCL3	3	BP
GO:1903978	regulation of microglial cell activation	3/88	19/18723	9.20655e-05	0.00097631	0.000692613	CTSC/CCL3/CST7	3	BP
GO:0043370	regulation of CD4-positive, alpha-beta T cell differentiation	4/88	51/18723	9.61826e-05	0.00101424	0.000719521	TNFSF4/IFNG/HLA-DRA/HLA-DRB1	4	BP
GO:0071356	cellular response to tumor necrosis factor	7/88	229/18723	0.000102339	0.00107313	0.000761296	CCL3L1/CCL3L3/VCAM1/CCL3/CCL4L1/CCL4/CCL5	7	BP
GO:0002834	regulation of response to tumor cell	3/88	20/18723	0.000107945	0.0011194	0.000794125	CRTAM/HAVCR2/HLA-DRB1	3	BP
GO:0002837	regulation of immune response to tumor cell	3/88	20/18723	0.000107945	0.0011194	0.000794125	CRTAM/HAVCR2/HLA-DRB1	3	BP
GO:0008347	glial cell migration	4/88	53/18723	0.0001119	0.00114774	0.000814229	GPR183/IDH2/ADGRG1/CCL3	4	BP
GO:0033059	cellular pigmentation	4/88	53/18723	0.0001119	0.00114774	0.000814229	RAB27A/CD63/ZEB2/LYST	4	BP
GO:1902106	negative regulation of leukocyte differentiation	5/88	102/18723	0.000119035	0.00121429	0.000861441	TNFSF4/ID2/CD74/LAG3/CCL3	5	BP
GO:0002823	negative regulation of adaptive immune response based on somatic recombination of immune receptors built from immunoglobulin superfamily domains	4/88	54/18723	0.000120421	0.00121521	0.000862095	IL7R/TNFSF4/HAVCR2/KLRD1	4	BP
GO:0070228	regulation of lymphocyte apoptotic process	4/88	54/18723	0.000120421	0.00121521	0.000862095	IL7R/PDCD1/CD74/CCL5	4	BP
GO:0045639	positive regulation of myeloid cell differentiation	5/88	103/18723	0.000124649	0.00125116	0.000887596	LEF1/ID2/CD74/IFNG/HLA-DRB1	5	BP
GO:0046641	positive regulation of alpha-beta T cell proliferation	3/88	21/18723	0.000125508	0.00125308	0.000888955	CD28/PTPN22/TNFSF4	3	BP
GO:0032635	interleukin-6 production	6/88	165/18723	0.00012763	0.00126085	0.000894473	PTPN22/TNFSF4/CD74/F2R/IFNG/HAVCR2	6	BP
GO:0032675	regulation of interleukin-6 production	6/88	165/18723	0.00012763	0.00126085	0.000894473	PTPN22/TNFSF4/CD74/F2R/IFNG/HAVCR2	6	BP
GO:0045620	negative regulation of lymphocyte differentiation	4/88	55/18723	0.000129402	0.00127166	0.000902139	TNFSF4/ID2/CD74/LAG3	4	BP
GO:0045071	negative regulation of viral genome replication	4/88	56/18723	0.000138858	0.00135748	0.000963024	OASL/APOBEC3C/APOBEC3G/CCL5	4	BP
GO:1903707	negative regulation of hemopoiesis	5/88	106/18723	0.000142715	0.00138796	0.000984644	TNFSF4/ID2/CD74/LAG3/CCL3	5	BP
GO:0045061	thymic T cell selection	3/88	22/18723	0.000144832	0.00140128	0.000994096	CCR7/CD28/CD74	3	BP
GO:0071216	cellular response to biotic stimulus	7/88	246/18723	0.00015946	0.00153491	0.00108889	PTPN22/TNFSF4/TNIP3/CXCL13/CCL3/HAVCR2/CCL5	7	BP
GO:0002820	negative regulation of adaptive immune response	4/88	59/18723	0.00017023	0.00163021	0.0011565	IL7R/TNFSF4/HAVCR2/KLRD1	4	BP
GO:0051851	modulation by host of symbiont process	4/88	60/18723	0.000181738	0.00173159	0.00122842	LEF1/CCL3/CCL4/CCL5	4	BP
GO:0001911	negative regulation of leukocyte mediated cytotoxicity	3/88	24/18723	0.000189061	0.001787	0.00126773	IL7R/HAVCR2/KLRD1	3	BP
GO:0034612	response to tumor necrosis factor	7/88	253/18723	0.000189459	0.001787	0.00126773	CCL3L1/CCL3L3/VCAM1/CCL3/CCL4L1/CCL4/CCL5	7	BP
GO:2000401	regulation of lymphocyte migration	4/88	61/18723	0.000193798	0.00181879	0.00129029	CXCL13/CCL3/CCL4/CCL5	4	BP
GO:0032615	interleukin-12 production	4/88	62/18723	0.000206424	0.00191811	0.00136074	LTB/CCR7/TNFSF4/IFNG	4	BP
GO:0032655	regulation of interleukin-12 production	4/88	62/18723	0.000206424	0.00191811	0.00136074	LTB/CCR7/TNFSF4/IFNG	4	BP
GO:0071675	regulation of mononuclear cell migration	5/88	115/18723	0.000209101	0.00193341	0.0013716	CCR7/CXCL13/CCL3/CCL4/CCL5	5	BP
GO:0032753	positive regulation of interleukin-4 production	3/88	25/18723	0.000214113	0.00197005	0.00139759	CD28/TNFSF4/HAVCR2	3	BP
GO:0002702	positive regulation of production of molecular mediator of immune response	5/88	117/18723	0.000226604	0.0020748	0.0014719	CD28/PTPN22/TNFSF4/CD244/CD74	5	BP
GO:0002407	dendritic cell chemotaxis	3/88	26/18723	0.00024122	0.00218729	0.00155171	GPR183/CCR7/CCL5	3	BP
GO:0019883	antigen processing and presentation of endogenous antigen	3/88	26/18723	0.00024122	0.00218729	0.00155171	CD74/HLA-DRA/HLA-DRB1	3	BP
GO:0048524	positive regulation of viral process	4/88	65/18723	0.00024786	0.0022367	0.00158676	CD28/CD74/HLA-DRB1/CCL5	4	BP
GO:0002562	somatic diversification of immune receptors via germline recombination within a single locus	4/88	66/18723	0.00026291	0.00233878	0.00165917	LEF1/CD28/TCF7/TNFSF4	4	BP
GO:0016444	somatic cell DNA recombination	4/88	66/18723	0.00026291	0.00233878	0.00165917	LEF1/CD28/TCF7/TNFSF4	4	BP
GO:0072678	T cell migration	4/88	66/18723	0.00026291	0.00233878	0.00165917	GPR183/CXCL13/CCL3/CCL5	4	BP
GO:0036037	CD8-positive, alpha-beta T cell activation	3/88	27/18723	0.000270452	0.00239452	0.00169872	PTPN22/EOMES/CRTAM	3	BP
GO:2000514	regulation of CD4-positive, alpha-beta T cell activation	4/88	67/18723	0.000278606	0.00245513	0.00174172	TNFSF4/IFNG/HLA-DRA/HLA-DRB1	4	BP
GO:0098636	protein complex involved in cell adhesion	3/89	36/19550	0.000584098	0.00253109	0.00184452	CD28/ITGA1/ITGAE	3	CC
GO:0048872	homeostasis of number of cells	7/88	272/18723	0.000294486	0.00258295	0.00183239	IL7R/GPR183/CCR7/ID2/CD74/F2R/ADGRG1	7	BP
GO:0031342	negative regulation of cell killing	3/88	28/18723	0.000301879	0.00263548	0.00186966	IL7R/HAVCR2/KLRD1	3	BP
GO:0050777	negative regulation of immune response	6/88	194/18723	0.000306773	0.0026658	0.00189117	IL7R/TNFSF4/PDCD1/HAVCR2/KLRD1/HLA-DRB1	6	BP
GO:0032612	interleukin-1 production	5/88	128/18723	0.000343644	0.00295881	0.00209904	CCR7/F2R/IFNG/CCL3/HAVCR2	5	BP
GO:0032652	regulation of interleukin-1 production	5/88	128/18723	0.000343644	0.00295881	0.00209904	CCR7/F2R/IFNG/CCL3/HAVCR2	5	BP
GO:0032722	positive regulation of chemokine production	4/88	71/18723	0.000348169	0.00298407	0.00211696	TNFSF4/CD74/IFNG/HAVCR2	4	BP
GO:0043032	positive regulation of macrophage activation	3/88	30/18723	0.000371592	0.00315601	0.00223893	CTSC/CCL3/HAVCR2	3	BP
GO:0070229	negative regulation of lymphocyte apoptotic process	3/88	30/18723	0.000371592	0.00315601	0.00223893	IL7R/CD74/CCL5	3	BP
GO:0019722	calcium-mediated signaling	6/88	202/18723	0.000380623	0.00321815	0.00228302	CCR7/CXCR6/PLEK/VCAM1/CCL3/CCL4	6	BP
GO:0002437	inflammatory response to antigenic stimulus	4/88	74/18723	0.000407915	0.00343344	0.00243575	CCR7/CD28/RBPJ/HLA-DRB1	4	BP
GO:0002323	natural killer cell activation involved in immune response	3/88	31/18723	0.000410012	0.00343568	0.00243734	RAB27A/CD244/ZNF683	3	BP
GO:0033077	T cell differentiation in thymus	4/88	75/18723	0.000429362	0.00358183	0.00254102	IL7R/CCR7/CD28/CD74	4	BP
GO:0002685	regulation of leukocyte migration	6/88	210/18723	0.000467719	0.00386744	0.00274363	CCR7/CD74/CXCL13/CCL3/CCL4/CCL5	6	BP
GO:0045637	regulation of myeloid cell differentiation	6/88	210/18723	0.000467719	0.00386744	0.00274363	LEF1/ID2/CD74/IFNG/CCL3/HLA-DRB1	6	BP
GO:0002200	somatic diversification of immune receptors	4/88	77/18723	0.00047465	0.00390753	0.00277208	LEF1/CD28/TCF7/TNFSF4	4	BP
GO:0036336	dendritic cell migration	3/88	33/18723	0.000494304	0.00405157	0.00287426	GPR183/CCR7/CCL5	3	BP
GO:0010922	positive regulation of phosphatase activity	3/88	34/18723	0.000540304	0.00437134	0.00310111	PLEK/ITGA1/IFNG	3	BP
GO:0050931	pigment cell differentiation	3/88	34/18723	0.000540304	0.00437134	0.00310111	RAB27A/CD63/ZEB2	3	BP
GO:0070232	regulation of T cell apoptotic process	3/88	34/18723	0.000540304	0.00437134	0.00310111	IL7R/PDCD1/CCL5	3	BP
GO:0051817	modulation of process of other organism involved in symbiotic interaction	4/88	81/18723	0.000575277	0.00463431	0.00328767	LEF1/CCL3/CCL4/CCL5	4	BP
GO:0032814	regulation of natural killer cell activation	3/88	35/18723	0.000588957	0.00470414	0.0033372	PTPN22/ZNF683/HAVCR2	3	BP
GO:0046640	regulation of alpha-beta T cell proliferation	3/88	35/18723	0.000588957	0.00470414	0.0033372	CD28/PTPN22/TNFSF4	3	BP
GO:0046633	alpha-beta T cell proliferation	3/88	38/18723	0.000751439	0.00597649	0.00423983	CD28/PTPN22/TNFSF4	3	BP
GO:0005164	tumor necrosis factor receptor binding	3/89	31/18368	0.000448059	0.0064107	0.00478897	LTB/TNFSF4/FASLG	3	MF
GO:0045622	regulation of T-helper cell differentiation	3/88	39/18723	0.000811305	0.0064254	0.0045583	TNFSF4/HLA-DRA/HLA-DRB1	3	BP
GO:1990907	beta-catenin-TCF complex	2/89	13/19550	0.00154712	0.00643602	0.00469022	LEF1/TCF7	2	CC
GO:0150077	regulation of neuroinflammatory response	3/88	40/18723	0.00087412	0.00689379	0.00489059	CTSC/CCL3/CST7	3	BP
GO:0048525	negative regulation of viral process	4/88	92/18723	0.000929006	0.007296	0.00517592	OASL/APOBEC3C/APOBEC3G/CCL5	4	BP
GO:0050856	regulation of T cell receptor signaling pathway	3/88	41/18723	0.00093994	0.00735111	0.00521502	CCR7/PTPN22/SH2D1A	3	BP
GO:0001915	negative regulation of T cell mediated cytotoxicity	2/88	10/18723	0.000959054	0.007408	0.00525537	IL7R/KLRD1	2	BP
GO:0070383	DNA cytosine deamination	2/88	10/18723	0.000959054	0.007408	0.00525537	APOBEC3C/APOBEC3G	2	BP
GO:1903980	positive regulation of microglial cell activation	2/88	10/18723	0.000959054	0.007408	0.00525537	CTSC/CCL3	2	BP
GO:0032755	positive regulation of interleukin-6 production	4/88	93/18723	0.000967309	0.00744114	0.00527889	TNFSF4/CD74/F2R/IFNG	4	BP
GO:0001664	G protein-coupled receptor binding	7/89	295/18368	0.000574839	0.00763714	0.00570517	CCL3L1/CCL3L3/CXCL13/CCL3/CCL4L1/CCL4/CCL5	7	MF
GO:0019080	viral gene expression	4/88	94/18723	0.00100671	0.00766622	0.00543856	LEF1/CCL3/CCL4/CCL5	4	BP
GO:0051702	biological process involved in interaction with symbiont	4/88	94/18723	0.00100671	0.00766622	0.00543856	LEF1/CCL3/CCL4/CCL5	4	BP
GO:0032689	negative regulation of interferon-gamma production	3/88	42/18723	0.00100882	0.00766622	0.00543856	TNFSF4/HAVCR2/HLA-DRB1	3	BP
GO:0061629	RNA polymerase II-specific DNA-binding transcription factor binding	7/89	299/18368	0.000622519	0.00771923	0.00576649	LEF1/GABARAPL1/BHLHE40/RBPJ/ID2/EOMES/OASL	7	MF
GO:0002700	regulation of production of molecular mediator of immune response	5/88	164/18723	0.00105817	0.00800881	0.0056816	CD28/PTPN22/TNFSF4/CD244/CD74	5	BP
GO:0002861	regulation of inflammatory response to antigenic stimulus	3/88	43/18723	0.00108082	0.00814736	0.00577989	CCR7/CD28/HLA-DRB1	3	BP
GO:1901216	positive regulation of neuron death	4/88	97/18723	0.00113167	0.00839039	0.0059523	ITGA1/FASLG/IFNG/CCL3	4	BP
GO:0043122	regulation of I-kappaB kinase/NF-kappaB signaling	6/88	249/18723	0.00113672	0.00839039	0.0059523	CCR7/TNIP3/CD74/F2R/FASLG/HLA-DRB1	6	BP
GO:0031295	T cell costimulation	3/88	44/18723	0.00115598	0.00839039	0.0059523	CCR7/CD28/TNFSF4	3	BP
GO:0048066	developmental pigmentation	3/88	44/18723	0.00115598	0.00839039	0.0059523	RAB27A/CD63/ZEB2	3	BP
GO:0002357	defense response to tumor cell	2/88	11/18723	0.0011686	0.00839039	0.0059523	ABI3/PRF1	2	BP
GO:0002604	regulation of dendritic cell antigen processing and presentation	2/88	11/18723	0.0011686	0.00839039	0.0059523	CCR7/CD74	2	BP
GO:0033625	positive regulation of integrin activation	2/88	11/18723	0.0011686	0.00839039	0.0059523	PLEK/CXCL13	2	BP
GO:0033632	regulation of cell-cell adhesion mediated by integrin	2/88	11/18723	0.0011686	0.00839039	0.0059523	CXCL13/CCL5	2	BP
GO:0045657	positive regulation of monocyte differentiation	2/88	11/18723	0.0011686	0.00839039	0.0059523	CD74/HLA-DRB1	2	BP
GO:0046598	positive regulation of viral entry into host cell	2/88	11/18723	0.0011686	0.00839039	0.0059523	CD74/HLA-DRB1	2	BP
GO:0046643	regulation of gamma-delta T cell activation	2/88	11/18723	0.0011686	0.00839039	0.0059523	LEF1/TCF7	2	BP
GO:0075294	positive regulation by symbiont of entry into host	2/88	11/18723	0.0011686	0.00839039	0.0059523	CD74/HLA-DRB1	2	BP
GO:0032642	regulation of chemokine production	4/88	98/18723	0.00117564	0.00839039	0.0059523	TNFSF4/CD74/IFNG/HAVCR2	4	BP
GO:0043473	pigmentation	4/88	98/18723	0.00117564	0.00839039	0.0059523	RAB27A/CD63/ZEB2/LYST	4	BP
GO:0032602	chemokine production	4/88	99/18723	0.00122079	0.00864686	0.00613424	TNFSF4/CD74/IFNG/HAVCR2	4	BP
GO:0042100	B cell proliferation	4/88	99/18723	0.00122079	0.00864686	0.00613424	IL7R/GPR183/LEF1/CD74	4	BP
GO:0031294	lymphocyte costimulation	3/88	46/18723	0.00131602	0.00928637	0.00658792	CCR7/CD28/TNFSF4	3	BP
GO:0032585	multivesicular body membrane	2/89	16/19550	0.00235915	0.00943659	0.00687687	RAB27A/CD63	2	CC
GO:0032677	regulation of interleukin-8 production	4/88	102/18723	0.00136351	0.00956248	0.00678381	PTPN22/CD244/CD74/F2R	4	BP
GO:0002863	positive regulation of inflammatory response to antigenic stimulus	2/88	12/18723	0.00139804	0.00956248	0.00678381	CCR7/CD28	2	BP
GO:0006216	cytidine catabolic process	2/88	12/18723	0.00139804	0.00956248	0.00678381	APOBEC3C/APOBEC3G	2	BP
GO:0009972	cytidine deamination	2/88	12/18723	0.00139804	0.00956248	0.00678381	APOBEC3C/APOBEC3G	2	BP
GO:0016554	cytidine to uridine editing	2/88	12/18723	0.00139804	0.00956248	0.00678381	APOBEC3C/APOBEC3G	2	BP
GO:0034154	toll-like receptor 7 signaling pathway	2/88	12/18723	0.00139804	0.00956248	0.00678381	PTPN22/HAVCR2	2	BP
GO:0046087	cytidine metabolic process	2/88	12/18723	0.00139804	0.00956248	0.00678381	APOBEC3C/APOBEC3G	2	BP
GO:0070493	thrombin-activated receptor signaling pathway	2/88	12/18723	0.00139804	0.00956248	0.00678381	PLEK/F2R	2	BP
GO:0045581	negative regulation of T cell differentiation	3/88	47/18723	0.001401	0.00956248	0.00678381	TNFSF4/CD74/LAG3	3	BP
GO:0032637	interleukin-8 production	4/88	103/18723	0.00141356	0.00961325	0.00681982	PTPN22/CD244/CD74/F2R	4	BP
GO:0030225	macrophage differentiation	3/88	49/18723	0.00158113	0.0106755	0.00757339	ID2/IFNG/HLA-DRB1	3	BP
GO:1904894	positive regulation of receptor signaling pathway via STAT	3/88	49/18723	0.00158113	0.0106755	0.00757339	IL7R/F2R/CCL5	3	BP
GO:0002824	positive regulation of adaptive immune response based on somatic recombination of immune receptors built from immunoglobulin superfamily domains	4/88	107/18723	0.00162664	0.0108865	0.00772307	CD28/TNFSF4/HLA-DRA/HLA-DRB1	4	BP
GO:0007229	integrin-mediated signaling pathway	4/88	107/18723	0.00162664	0.0108865	0.00772307	PLEK/ITGA1/CD63/ITGAE	4	BP
GO:0001768	establishment of T cell polarity	2/88	13/18723	0.00164718	0.0108865	0.00772307	CCR7/CRTAM	2	BP
GO:0042492	gamma-delta T cell differentiation	2/88	13/18723	0.00164718	0.0108865	0.00772307	LEF1/TCF7	2	BP
GO:0051709	regulation of killing of cells of other organism	2/88	13/18723	0.00164718	0.0108865	0.00772307	IFNG/PRF1	2	BP
GO:0070234	positive regulation of T cell apoptotic process	2/88	13/18723	0.00164718	0.0108865	0.00772307	PDCD1/CCL5	2	BP
GO:0071622	regulation of granulocyte chemotaxis	3/88	51/18723	0.00177514	0.011691	0.00829382	CCR7/CD74/CCL5	3	BP
GO:0002698	negative regulation of immune effector process	4/88	110/18723	0.00180043	0.0117072	0.00830528	IL7R/TNFSF4/HAVCR2/KLRD1	4	BP
GO:0032611	interleukin-1 beta production	4/88	110/18723	0.00180043	0.0117072	0.00830528	CCR7/F2R/IFNG/CCL3	4	BP
GO:0032651	regulation of interleukin-1 beta production	4/88	110/18723	0.00180043	0.0117072	0.00830528	CCR7/F2R/IFNG/CCL3	4	BP
GO:0043433	negative regulation of DNA-binding transcription factor activity	5/88	185/18723	0.00180254	0.0117072	0.00830528	TNFSF4/BHLHE40/ID2/EOMES/HAVCR2	5	BP
GO:0047844	deoxycytidine deaminase activity	2/89	10/18368	0.00101861	0.0118414	0.00884585	APOBEC3C/APOBEC3G	2	MF
GO:0043123	positive regulation of I-kappaB kinase/NF-kappaB signaling	5/88	186/18723	0.00184558	0.0119453	0.00847424	CCR7/CD74/F2R/FASLG/HLA-DRB1	5	BP
GO:0014066	regulation of phosphatidylinositol 3-kinase signaling	4/88	111/18723	0.00186111	0.0120045	0.00851621	CD28/PIK3IP1/F2R/CCL5	4	BP
GO:0001767	establishment of lymphocyte polarity	2/88	14/18723	0.00191585	0.01219	0.00864781	CCR7/CRTAM	2	BP
GO:0045006	DNA deamination	2/88	14/18723	0.00191585	0.01219	0.00864781	APOBEC3C/APOBEC3G	2	BP
GO:0046131	pyrimidine ribonucleoside metabolic process	2/88	14/18723	0.00191585	0.01219	0.00864781	APOBEC3C/APOBEC3G	2	BP
GO:0046133	pyrimidine ribonucleoside catabolic process	2/88	14/18723	0.00191585	0.01219	0.00864781	APOBEC3C/APOBEC3G	2	BP
GO:0002821	positive regulation of adaptive immune response	4/88	112/18723	0.0019232	0.0121954	0.00865165	CD28/TNFSF4/HLA-DRA/HLA-DRB1	4	BP
GO:0002707	negative regulation of lymphocyte mediated immunity	3/88	53/18723	0.0019834	0.0125348	0.00889243	IL7R/HAVCR2/KLRD1	3	BP
GO:1904892	regulation of receptor signaling pathway via STAT	4/88	114/18723	0.00205165	0.0129226	0.00916755	IL7R/F2R/IFNG/CCL5	4	BP
GO:0042608	T cell receptor binding	2/89	11/18368	0.00124105	0.0130816	0.00977237	HLA-DRA/HLA-DRB1	2	MF
GO:0004896	cytokine receptor activity	4/89	97/18368	0.00126597	0.0130816	0.00977237	IL7R/CCR7/CXCR6/CD74	4	MF
GO:0007249	I-kappaB kinase/NF-kappaB signaling	6/88	281/18723	0.0020989	0.0131761	0.00934735	CCR7/TNIP3/CD74/F2R/FASLG/HLA-DRB1	6	BP
GO:0051209	release of sequestered calcium ion into cytosol	4/88	115/18723	0.00211805	0.0132519	0.00940115	CCR7/F2R/FASLG/CCL3	4	BP
GO:0051283	negative regulation of sequestering of calcium ion	4/88	116/18723	0.00218591	0.0136073	0.0096533	CCR7/F2R/FASLG/CCL3	4	BP
GO:0002836	positive regulation of response to tumor cell	2/88	15/18723	0.00220385	0.0136073	0.0096533	CRTAM/HLA-DRB1	2	BP
GO:0002839	positive regulation of immune response to tumor cell	2/88	15/18723	0.00220385	0.0136073	0.0096533	CRTAM/HLA-DRB1	2	BP
GO:0010820	positive regulation of T cell chemotaxis	2/88	15/18723	0.00220385	0.0136073	0.0096533	CXCL13/CCL5	2	BP
GO:0002711	positive regulation of T cell mediated immunity	3/88	56/18723	0.00232329	0.014222	0.0100893	TNFSF4/HLA-DRA/HLA-DRB1	3	BP
GO:0031529	ruffle organization	3/88	56/18723	0.00232329	0.014222	0.0100893	CCR7/PLEK/ABI3	3	BP
GO:0051282	regulation of sequestering of calcium ion	4/88	118/18723	0.00232613	0.014222	0.0100893	CCR7/F2R/FASLG/CCL3	4	BP
GO:0004126	cytidine deaminase activity	2/89	12/18368	0.00148457	0.0143897	0.0107495	APOBEC3C/APOBEC3G	2	MF
GO:0004252	serine-type endopeptidase activity	5/89	174/18368	0.00157372	0.0143897	0.0107495	CTSC/GZMK/GZMA/GZMB/GZMH	5	MF
GO:0015026	coreceptor activity	3/89	48/18368	0.00162465	0.0143897	0.0107495	CD28/CXCR6/CD8A	3	MF
GO:0032813	tumor necrosis factor receptor superfamily binding	3/89	49/18368	0.00172458	0.0145805	0.0108921	LTB/TNFSF4/FASLG	3	MF
GO:0050864	regulation of B cell activation	5/88	198/18723	0.00242264	0.014764	0.0104738	GPR183/CD28/TNFSF4/ID2/CD74	5	BP
GO:0044403	biological process involved in symbiotic interaction	6/88	290/18723	0.00245664	0.014868	0.0105477	LEF1/CD74/CCL3/HLA-DRB1/CCL4/CCL5	6	BP
GO:0002830	positive regulation of type 2 immune response	2/88	16/18723	0.00251101	0.014868	0.0105477	TNFSF4/CD74	2	BP
GO:0010819	regulation of T cell chemotaxis	2/88	16/18723	0.00251101	0.014868	0.0105477	CXCL13/CCL5	2	BP
GO:0010919	regulation of inositol phosphate biosynthetic process	2/88	16/18723	0.00251101	0.014868	0.0105477	CD244/PLEK	2	BP
GO:0033631	cell-cell adhesion mediated by integrin	2/88	16/18723	0.00251101	0.014868	0.0105477	CXCL13/CCL5	2	BP
GO:0034138	toll-like receptor 3 signaling pathway	2/88	16/18723	0.00251101	0.014868	0.0105477	PTPN22/HAVCR2	2	BP
GO:0045869	negative regulation of single stranded viral RNA replication via double stranded DNA intermediate	2/88	16/18723	0.00251101	0.014868	0.0105477	APOBEC3C/APOBEC3G	2	BP
GO:0046135	pyrimidine nucleoside catabolic process	2/88	16/18723	0.00251101	0.014868	0.0105477	APOBEC3C/APOBEC3G	2	BP
GO:0070230	positive regulation of lymphocyte apoptotic process	2/88	16/18723	0.00251101	0.014868	0.0105477	PDCD1/CCL5	2	BP
GO:0043525	positive regulation of neuron apoptotic process	3/88	58/18723	0.00256873	0.0151619	0.0107562	ITGA1/FASLG/CCL3	3	BP
GO:0051208	sequestering of calcium ion	4/88	122/18723	0.00262494	0.0153969	0.0109228	CCR7/F2R/FASLG/CCL3	4	BP
GO:0051928	positive regulation of calcium ion transport	4/88	122/18723	0.00262494	0.0153969	0.0109228	F2R/CCL3/CCL4/CCL5	4	BP
GO:0042827	platelet dense granule	2/89	21/19550	0.00406795	0.0156691	0.0114188	CD63/CTSW	2	CC
GO:0035306	positive regulation of dephosphorylation	3/88	59/18723	0.00269722	0.0157716	0.0111886	PLEK/ITGA1/IFNG	3	BP
GO:0031663	lipopolysaccharide-mediated signaling pathway	3/88	60/18723	0.00282961	0.0164361	0.0116601	PTPN22/CCL3/CCL5	3	BP
GO:0033151	V(D)J recombination	2/88	17/18723	0.00283714	0.0164361	0.0116601	LEF1/TCF7	2	BP
GO:0033623	regulation of integrin activation	2/88	17/18723	0.00283714	0.0164361	0.0116601	PLEK/CXCL13	2	BP
GO:0030246	carbohydrate binding	6/89	271/18368	0.00203923	0.0164912	0.0123194	SELL/KLRG1/CLEC2B/KLRD1/HLA-DRA/HLA-DRB1	6	MF
GO:0032613	interleukin-10 production	3/88	62/18723	0.00310626	0.0177217	0.0125721	CD28/TNFSF4/HLA-DRB1	3	BP
GO:0032623	interleukin-2 production	3/88	62/18723	0.00310626	0.0177217	0.0125721	CD28/LAG3/HAVCR2	3	BP
GO:0032653	regulation of interleukin-10 production	3/88	62/18723	0.00310626	0.0177217	0.0125721	CD28/TNFSF4/HLA-DRB1	3	BP
GO:0032663	regulation of interleukin-2 production	3/88	62/18723	0.00310626	0.0177217	0.0125721	CD28/LAG3/HAVCR2	3	BP
GO:0032757	positive regulation of interleukin-8 production	3/88	62/18723	0.00310626	0.0177217	0.0125721	CD244/CD74/F2R	3	BP
GO:0034162	toll-like receptor 9 signaling pathway	2/88	18/18723	0.00318206	0.0179361	0.0127242	PTPN22/HAVCR2	2	BP
GO:0045953	negative regulation of natural killer cell mediated cytotoxicity	2/88	18/18723	0.00318206	0.0179361	0.0127242	HAVCR2/KLRD1	2	BP
GO:0048535	lymph node development	2/88	18/18723	0.00318206	0.0179361	0.0127242	IL7R/LTB	2	BP
GO:0150078	positive regulation of neuroinflammatory response	2/88	18/18723	0.00318206	0.0179361	0.0127242	CTSC/CCL3	2	BP
GO:0002704	negative regulation of leukocyte mediated immunity	3/88	63/18723	0.00325059	0.018213	0.0129207	IL7R/HAVCR2/KLRD1	3	BP
GO:0050854	regulation of antigen receptor-mediated signaling pathway	3/88	63/18723	0.00325059	0.018213	0.0129207	CCR7/PTPN22/SH2D1A	3	BP
GO:0008236	serine-type peptidase activity	5/89	191/18368	0.00236467	0.0183262	0.0136902	CTSC/GZMK/GZMA/GZMB/GZMH	5	MF
GO:0017171	serine hydrolase activity	5/89	195/18368	0.00258647	0.0190681	0.0142444	CTSC/GZMK/GZMA/GZMB/GZMH	5	MF
GO:0016004	phospholipase activator activity	2/89	16/18368	0.00266543	0.0190681	0.0142444	CCL3/CCL5	2	MF
GO:0002281	macrophage activation involved in immune response	2/88	19/18723	0.00354558	0.0194025	0.0137645	IFNG/HAVCR2	2	BP
GO:0002483	antigen processing and presentation of endogenous peptide antigen	2/88	19/18723	0.00354558	0.0194025	0.0137645	HLA-DRA/HLA-DRB1	2	BP
GO:0002716	negative regulation of natural killer cell mediated immunity	2/88	19/18723	0.00354558	0.0194025	0.0137645	HAVCR2/KLRD1	2	BP
GO:0032616	interleukin-13 production	2/88	19/18723	0.00354558	0.0194025	0.0137645	LEF1/TNFSF4	2	BP
GO:0032656	regulation of interleukin-13 production	2/88	19/18723	0.00354558	0.0194025	0.0137645	LEF1/TNFSF4	2	BP
GO:0045091	regulation of single stranded viral RNA replication via double stranded DNA intermediate	2/88	19/18723	0.00354558	0.0194025	0.0137645	APOBEC3C/APOBEC3G	2	BP
GO:0070233	negative regulation of T cell apoptotic process	2/88	19/18723	0.00354558	0.0194025	0.0137645	IL7R/CCL5	2	BP
GO:2001185	regulation of CD8-positive, alpha-beta T cell activation	2/88	19/18723	0.00354558	0.0194025	0.0137645	PTPN22/CRTAM	2	BP
GO:0007596	blood coagulation	5/88	217/18723	0.00359006	0.0195888	0.0138966	DGKA/RAB27A/PLEK/ANXA5/F2R	5	BP
GO:0042130	negative regulation of T cell proliferation	3/88	67/18723	0.0038688	0.0210028	0.0148998	CRTAM/HAVCR2/HLA-DRB1	3	BP
GO:0002577	regulation of antigen processing and presentation	2/88	20/18723	0.00392754	0.0210028	0.0148998	CCR7/CD74	2	BP
GO:0016553	base conversion or substitution editing	2/88	20/18723	0.00392754	0.0210028	0.0148998	APOBEC3C/APOBEC3G	2	BP
GO:0039692	single stranded viral RNA replication via double stranded DNA intermediate	2/88	20/18723	0.00392754	0.0210028	0.0148998	APOBEC3C/APOBEC3G	2	BP
GO:0045063	T-helper 1 cell differentiation	2/88	20/18723	0.00392754	0.0210028	0.0148998	LEF1/TNFSF4	2	BP
GO:0046629	gamma-delta T cell activation	2/88	20/18723	0.00392754	0.0210028	0.0148998	LEF1/TCF7	2	BP
GO:1990182	exosomal secretion	2/88	20/18723	0.00392754	0.0210028	0.0148998	RAB27A/IFNG	2	BP
GO:0007599	hemostasis	5/88	222/18723	0.00395466	0.021028	0.0149177	DGKA/RAB27A/PLEK/ANXA5/F2R	5	BP
GO:0050817	coagulation	5/88	222/18723	0.00395466	0.021028	0.0149177	DGKA/RAB27A/PLEK/ANXA5/F2R	5	BP
GO:0009988	cell-cell recognition	3/88	68/18723	0.00403375	0.0213277	0.0151303	CCR7/HAVCR2/PRF1	3	BP
GO:0031640	killing of cells of other organism	3/88	68/18723	0.00403375	0.0213277	0.0151303	GNLY/IFNG/PRF1	3	BP
GO:0033630	positive regulation of cell adhesion mediated by integrin	2/88	21/18723	0.00432776	0.0225645	0.0160076	CXCL13/CCL5	2	BP
GO:0042454	ribonucleoside catabolic process	2/88	21/18723	0.00432776	0.0225645	0.0160076	APOBEC3C/APOBEC3G	2	BP
GO:0045655	regulation of monocyte differentiation	2/88	21/18723	0.00432776	0.0225645	0.0160076	CD74/HLA-DRB1	2	BP
GO:0070269	pyroptosis	2/88	21/18723	0.00432776	0.0225645	0.0160076	GZMA/GZMB	2	BP
GO:0097734	extracellular exosome biogenesis	2/88	21/18723	0.00432776	0.0225645	0.0160076	RAB27A/IFNG	2	BP
GO:0045123	cellular extravasation	3/88	70/18723	0.00437634	0.0227546	0.0161425	SELL/ITGA1/VCAM1	3	BP
GO:0030183	B cell differentiation	4/88	141/18723	0.00440803	0.022856	0.0162145	GPR183/RBPJ/ID2/VCAM1	4	BP
GO:0060229	lipase activator activity	2/89	18/18368	0.0033771	0.0232645	0.0173792	CCL3/CCL5	2	MF
GO:0097553	calcium ion transmembrane import into cytosol	4/88	142/18723	0.00451978	0.0233709	0.0165797	CCR7/F2R/FASLG/CCL3	4	BP
GO:0062013	positive regulation of small molecule metabolic process	4/88	143/18723	0.00463342	0.0238927	0.0169499	LDLRAP1/CD244/CD74/IFNG	4	BP
GO:0032069	regulation of nuclease activity	2/88	22/18723	0.00474605	0.0241567	0.0171372	OASL/GZMA	2	BP
GO:0032700	negative regulation of interleukin-17 production	2/88	22/18723	0.00474605	0.0241567	0.0171372	TNFSF4/IFNG	2	BP
GO:0050860	negative regulation of T cell receptor signaling pathway	2/88	22/18723	0.00474605	0.0241567	0.0171372	PTPN22/SH2D1A	2	BP
GO:0014065	phosphatidylinositol 3-kinase signaling	4/88	144/18723	0.00474897	0.0241567	0.0171372	CD28/PIK3IP1/F2R/CCL5	4	BP
GO:0031644	regulation of nervous system process	4/88	144/18723	0.00474897	0.0241567	0.0171372	CTSC/F2R/CCL3/CST7	4	BP
GO:0032732	positive regulation of interleukin-1 production	3/88	73/18723	0.00492247	0.0249042	0.0176675	IFNG/CCL3/HAVCR2	3	BP
GO:0050848	regulation of calcium-mediated signaling	3/88	73/18723	0.00492247	0.0249042	0.0176675	PLEK/CCL3/CCL4	3	BP
GO:0034695	response to prostaglandin E	2/88	23/18723	0.00518225	0.026078	0.0185002	CCR7/TNFSF4	2	BP
GO:0140112	extracellular vesicle biogenesis	2/88	23/18723	0.00518225	0.026078	0.0185002	RAB27A/IFNG	2	BP
GO:0045834	positive regulation of lipid metabolic process	4/88	149/18723	0.00535589	0.0268797	0.0190689	CCR7/LDLRAP1/CD74/IFNG	4	BP
GO:0042288	MHC class I protein binding	2/89	20/18368	0.0041675	0.0276841	0.0206808	CD244/CD8A	2	MF
GO:0006213	pyrimidine nucleoside metabolic process	2/88	24/18723	0.00563617	0.0281359	0.0199601	APOBEC3C/APOBEC3G	2	BP
GO:0090023	positive regulation of neutrophil chemotaxis	2/88	24/18723	0.00563617	0.0281359	0.0199601	CCR7/CD74	2	BP
GO:0050871	positive regulation of B cell activation	4/88	152/18723	0.00574388	0.0285975	0.0202876	GPR183/CD28/TNFSF4/CD74	4	BP
GO:0140416	transcription regulator inhibitor activity	2/89	21/18368	0.00459173	0.0294504	0.0220003	LEF1/ID2	2	MF
GO:0030318	melanocyte differentiation	2/88	25/18723	0.00610766	0.0302174	0.0214368	RAB27A/ZEB2	2	BP
GO:0033622	integrin activation	2/88	25/18723	0.00610766	0.0302174	0.0214368	PLEK/CXCL13	2	BP
GO:0014068	positive regulation of phosphatidylinositol 3-kinase signaling	3/88	79/18723	0.00613363	0.0302174	0.0214368	CD28/F2R/CCL5	3	BP
GO:1901184	regulation of ERBB signaling pathway	3/88	79/18723	0.00613363	0.0302174	0.0214368	RBPJ/ITGA1/FASLG	3	BP
GO:0033002	muscle cell proliferation	5/88	248/18723	0.00628888	0.0309011	0.0219218	LDLRAP1/RBPJ/ID2/IFNG/CCL5	5	BP
GO:0002710	negative regulation of T cell mediated immunity	2/88	26/18723	0.00659653	0.0320769	0.0227559	IL7R/KLRD1	2	BP
GO:0009164	nucleoside catabolic process	2/88	26/18723	0.00659653	0.0320769	0.0227559	APOBEC3C/APOBEC3G	2	BP
GO:1905523	positive regulation of macrophage migration	2/88	26/18723	0.00659653	0.0320769	0.0227559	CCL3/CCL5	2	BP
GO:2000108	positive regulation of leukocyte apoptotic process	2/88	26/18723	0.00659653	0.0320769	0.0227559	PDCD1/CCL5	2	BP
GO:0008305	integrin complex	2/89	31/19550	0.00874594	0.0324849	0.0236732	ITGA1/ITGAE	2	CC
GO:0001892	embryonic placenta development	3/88	82/18723	0.0068001	0.0328964	0.0233373	LEF1/RBPJ/EOMES	3	BP
GO:0002312	B cell activation involved in immune response	3/88	82/18723	0.0068001	0.0328964	0.0233373	GPR183/CD28/TNFSF4	3	BP
GO:0060402	calcium ion transport into cytosol	4/88	160/18723	0.00686923	0.0331454	0.0235139	CCR7/F2R/FASLG/CCL3	4	BP
GO:0050672	negative regulation of lymphocyte proliferation	3/88	83/18723	0.00703145	0.0336657	0.0238831	CRTAM/HAVCR2/HLA-DRB1	3	BP
GO:0002825	regulation of T-helper 1 type immune response	2/88	27/18723	0.00710261	0.0336657	0.0238831	TNFSF4/HAVCR2	2	BP
GO:0010528	regulation of transposition	2/88	27/18723	0.00710261	0.0336657	0.0238831	APOBEC3C/APOBEC3G	2	BP
GO:0010529	negative regulation of transposition	2/88	27/18723	0.00710261	0.0336657	0.0238831	APOBEC3C/APOBEC3G	2	BP
GO:0032703	negative regulation of interleukin-2 production	2/88	27/18723	0.00710261	0.0336657	0.0238831	LAG3/HAVCR2	2	BP
GO:0045830	positive regulation of isotype switching	2/88	27/18723	0.00710261	0.0336657	0.0238831	CD28/TNFSF4	2	BP
GO:0071624	positive regulation of granulocyte chemotaxis	2/88	27/18723	0.00710261	0.0336657	0.0238831	CCR7/CD74	2	BP
GO:0016493	C-C chemokine receptor activity	2/89	23/18368	0.0054973	0.0340832	0.0254612	CCR7/CXCR6	2	MF
GO:0010921	regulation of phosphatase activity	3/88	84/18723	0.00726743	0.0342738	0.0243145	PLEK/ITGA1/IFNG	3	BP
GO:0032945	negative regulation of mononuclear cell proliferation	3/88	84/18723	0.00726743	0.0342738	0.0243145	CRTAM/HAVCR2/HLA-DRB1	3	BP
GO:0031348	negative regulation of defense response	5/88	258/18723	0.00740143	0.0348182	0.0247007	AOAH/HAVCR2/CST7/KLRD1/HLA-DRB1	5	BP
GO:0007205	protein kinase C-activating G protein-coupled receptor signaling pathway	2/88	28/18723	0.00762575	0.0354295	0.0251344	DGKA/F2R	2	BP
GO:0032438	melanosome organization	2/88	28/18723	0.00762575	0.0354295	0.0251344	ZEB2/LYST	2	BP
GO:0032958	inositol phosphate biosynthetic process	2/88	28/18723	0.00762575	0.0354295	0.0251344	CD244/PLEK	2	BP
GO:0080111	DNA demethylation	2/88	28/18723	0.00762575	0.0354295	0.0251344	APOBEC3C/APOBEC3G	2	BP
GO:1902624	positive regulation of neutrophil migration	2/88	28/18723	0.00762575	0.0354295	0.0251344	CCR7/CD74	2	BP
GO:0019957	C-C chemokine binding	2/89	24/18368	0.00597825	0.0358695	0.0267956	CCR7/CXCR6	2	MF
GO:0001773	myeloid dendritic cell activation	2/88	29/18723	0.00816576	0.0373832	0.0265204	RBPJ/HAVCR2	2	BP
GO:0001916	positive regulation of T cell mediated cytotoxicity	2/88	29/18723	0.00816576	0.0373832	0.0265204	HLA-DRA/HLA-DRB1	2	BP
GO:0043153	entrainment of circadian clock by photoperiod	2/88	29/18723	0.00816576	0.0373832	0.0265204	BHLHE40/ID2	2	BP
GO:0048753	pigment granule organization	2/88	29/18723	0.00816576	0.0373832	0.0265204	ZEB2/LYST	2	BP
GO:1903902	positive regulation of viral life cycle	2/88	29/18723	0.00816576	0.0373832	0.0265204	CD74/HLA-DRB1	2	BP
GO:2000406	positive regulation of T cell migration	2/88	29/18723	0.00816576	0.0373832	0.0265204	CXCL13/CCL5	2	BP
GO:0030247	polysaccharide binding	2/89	25/18368	0.00647774	0.0376519	0.028127	HLA-DRA/HLA-DRB1	2	MF
GO:0001637	G protein-coupled chemoattractant receptor activity	2/89	26/18368	0.00699558	0.0382699	0.0285887	CCR7/CXCR6	2	MF
GO:0004950	chemokine receptor activity	2/89	26/18368	0.00699558	0.0382699	0.0285887	CCR7/CXCR6	2	MF
GO:0050708	regulation of protein secretion	5/88	268/18723	0.00864481	0.0394509	0.0279872	F2R/IDH2/IFNG/HLA-DRB1/CCL5	5	BP
GO:0034694	response to prostaglandin	2/88	30/18723	0.00872249	0.0394509	0.0279872	CCR7/TNFSF4	2	BP
GO:0045070	positive regulation of viral genome replication	2/88	30/18723	0.00872249	0.0394509	0.0279872	CD28/CCL5	2	BP
GO:0045940	positive regulation of steroid metabolic process	2/88	30/18723	0.00872249	0.0394509	0.0279872	LDLRAP1/IFNG	2	BP
GO:0050858	negative regulation of antigen receptor-mediated signaling pathway	2/88	30/18723	0.00872249	0.0394509	0.0279872	PTPN22/SH2D1A	2	BP
GO:0070664	negative regulation of leukocyte proliferation	3/88	90/18723	0.00878173	0.0396233	0.0281095	CRTAM/HAVCR2/HLA-DRB1	3	BP
GO:0031904	endosome lumen	2/89	35/19550	0.0110602	0.0396641	0.028905	CD63/PRF1	2	CC
GO:0002221	pattern recognition receptor signaling pathway	4/88	172/18723	0.00881676	0.039686	0.028154	PTPN22/TNIP3/OASL/HAVCR2	4	BP
GO:0002275	myeloid cell activation involved in immune response	3/88	91/18723	0.0090507	0.0406416	0.0288319	IFNG/CCL3/HAVCR2	3	BP
GO:0002230	positive regulation of defense response to virus by host	2/88	31/18723	0.00929576	0.0412486	0.0292625	PTPN22/APOBEC3G	2	BP
GO:0002828	regulation of type 2 immune response	2/88	31/18723	0.00929576	0.0412486	0.0292625	TNFSF4/CD74	2	BP
GO:0034656	nucleobase-containing small molecule catabolic process	2/88	31/18723	0.00929576	0.0412486	0.0292625	APOBEC3C/APOBEC3G	2	BP
GO:0035510	DNA dealkylation	2/88	31/18723	0.00929576	0.0412486	0.0292625	APOBEC3C/APOBEC3G	2	BP
GO:0070528	protein kinase C signaling	2/88	31/18723	0.00929576	0.0412486	0.0292625	PLEK/ADGRG1	2	BP
GO:1905475	regulation of protein localization to membrane	4/88	175/18723	0.00935446	0.0414111	0.0293778	LDLRAP1/ABI3/IFNG/GZMB	4	BP
GO:0001540	amyloid-beta binding	3/89	84/18368	0.00789789	0.0419716	0.031354	LDLRAP1/ITM2C/CD74	3	MF
GO:0043270	positive regulation of ion transport	5/88	275/18723	0.0095969	0.0423844	0.0300683	F2R/IFNG/CCL3/CCL4/CCL5	5	BP
GO:0032196	transposition	2/88	32/18723	0.00988542	0.043256	0.0306866	APOBEC3C/APOBEC3G	2	BP
GO:0050850	positive regulation of calcium-mediated signaling	2/88	32/18723	0.00988542	0.043256	0.0306866	CCL3/CCL4	2	BP
GO:0090022	regulation of neutrophil chemotaxis	2/88	32/18723	0.00988542	0.043256	0.0306866	CCR7/CD74	2	BP
GO:0030316	osteoclast differentiation	3/88	94/18723	0.00988644	0.043256	0.0306866	GPR183/IFNG/CCL3	3	BP
GO:0048015	phosphatidylinositol-mediated signaling	4/88	178/18723	0.00991313	0.043272	0.030698	CD28/PIK3IP1/F2R/CCL5	4	BP
GO:0042982	amyloid precursor protein metabolic process	3/88	95/18723	0.0101747	0.0443106	0.0314348	LDLRAP1/ITM2C/IFNG	3	BP
GO:0048660	regulation of smooth muscle cell proliferation	4/88	180/18723	0.0102974	0.0447412	0.0317402	LDLRAP1/ID2/IFNG/CCL5	4	BP
GO:0009648	photoperiodism	2/88	33/18723	0.0104913	0.0448645	0.0318277	BHLHE40/ID2	2	BP
GO:0035025	positive regulation of Rho protein signal transduction	2/88	33/18723	0.0104913	0.0448645	0.0318277	F2R/ADGRG1	2	BP
GO:0050901	leukocyte tethering or rolling	2/88	33/18723	0.0104913	0.0448645	0.0318277	SELL/VCAM1	2	BP
GO:0071353	cellular response to interleukin-4	2/88	33/18723	0.0104913	0.0448645	0.0318277	LEF1/TCF7	2	BP
GO:0032640	tumor necrosis factor production	4/88	181/18723	0.0104931	0.0448645	0.0318277	PTPN22/IFNG/CCL3/HAVCR2	4	BP
GO:0032680	regulation of tumor necrosis factor production	4/88	181/18723	0.0104931	0.0448645	0.0318277	PTPN22/IFNG/CCL3/HAVCR2	4	BP
GO:0097696	receptor signaling pathway via STAT	4/88	181/18723	0.0104931	0.0448645	0.0318277	IL7R/F2R/IFNG/CCL5	4	BP
GO:0048017	inositol lipid-mediated signaling	4/88	182/18723	0.0106912	0.0455042	0.0322815	CD28/PIK3IP1/F2R/CCL5	4	BP
GO:0060401	cytosolic calcium ion transport	4/88	182/18723	0.0106912	0.0455042	0.0322815	CCR7/F2R/FASLG/CCL3	4	BP
GO:0048659	smooth muscle cell proliferation	4/88	184/18723	0.0110946	0.047087	0.0334044	LDLRAP1/ID2/IFNG/CCL5	4	BP
GO:0009649	entrainment of circadian clock	2/88	34/18723	0.0111132	0.047087	0.0334044	BHLHE40/ID2	2	BP
GO:0071706	tumor necrosis factor superfamily cytokine production	4/88	186/18723	0.0115077	0.0485394	0.0344347	PTPN22/IFNG/CCL3/HAVCR2	4	BP
GO:1903555	regulation of tumor necrosis factor superfamily cytokine production	4/88	186/18723	0.0115077	0.0485394	0.0344347	PTPN22/IFNG/CCL3/HAVCR2	4	BP
GO:0009119	ribonucleoside metabolic process	2/88	35/18723	0.0117511	0.0492338	0.0349274	APOBEC3C/APOBEC3G	2	BP
GO:0039694	viral RNA genome replication	2/88	35/18723	0.0117511	0.0492338	0.0349274	APOBEC3C/APOBEC3G	2	BP
GO:1903514	release of sequestered calcium ion into cytosol by endoplasmic reticulum	2/88	35/18723	0.0117511	0.0492338	0.0349274	FASLG/CCL3	2	BP

## Sheet: Trajectory 2
Supplementary Table 10: GO Enrichment Analysis Results for Highly Weighted Genes Associated with Trajectory 2 of CRC (Benjamini–Hochberg-adjusted P value < 0.05)
ID	Description	GeneRatio	BgRatio	pvalue	p.adjust	qvalue	geneID	Count	ONTOLOGY
GO:0022409	positive regulation of cell-cell adhesion	16/101	284/18723	2.59232e-12	5.16908e-09	3.79297e-09	CCL5/CD160/ANXA1/TFRC/HLA-DQA1/TNFSF4/IL6ST/CD28/VCAM1/SIRPG/HLA-DRA/ADAM19/ICOS/CXCL13/HAVCR2/CD27	16	BP
GO:0050870	positive regulation of T cell activation	14/101	216/18723	1.02724e-11	1.02416e-08	7.51506e-09	CCL5/CD160/ANXA1/TFRC/HLA-DQA1/TNFSF4/IL6ST/CD28/VCAM1/SIRPG/HLA-DRA/ICOS/HAVCR2/CD27	14	BP
GO:0002366	leukocyte activation involved in immune response	15/101	275/18723	2.09776e-11	1.28348e-08	9.41796e-09	CX3CR1/FGR/KLRC2/CD244/ANXA1/PTGDR/CD300A/TFRC/LGALS3/TNFSF4/BATF/ITM2A/CD28/HLA-DRA/HAVCR2	15	BP
GO:0002263	cell activation involved in immune response	15/101	279/18723	2.57469e-11	1.28348e-08	9.41796e-09	CX3CR1/FGR/KLRC2/CD244/ANXA1/PTGDR/CD300A/TFRC/LGALS3/TNFSF4/BATF/ITM2A/CD28/HLA-DRA/HAVCR2	15	BP
GO:0050777	negative regulation of immune response	13/101	194/18723	3.89688e-11	1.32764e-08	9.74197e-09	KLRD1/CD160/FGR/A2M/LYAR/ANXA1/CD300A/LGALS3/TNFSF4/SAMSN1/PDCD1/CTLA4/HAVCR2	13	BP
GO:1903039	positive regulation of leukocyte cell-cell adhesion	14/101	239/18723	3.99491e-11	1.32764e-08	9.74197e-09	CCL5/CD160/ANXA1/TFRC/HLA-DQA1/TNFSF4/IL6ST/CD28/VCAM1/SIRPG/HLA-DRA/ICOS/HAVCR2/CD27	14	BP
GO:0042129	regulation of T cell proliferation	11/101	171/18723	2.08564e-09	5.9411e-07	4.35947e-07	CCL5/ANXA1/TFRC/PELI1/LGALS3/TNFSF4/IL6ST/CD28/VCAM1/CTLA4/HAVCR2	11	BP
GO:0050670	regulation of lymphocyte proliferation	12/101	225/18723	3.14689e-09	7.7056e-07	5.65422e-07	CCL5/ANXA1/CD300A/TFRC/PELI1/LGALS3/TNFSF4/IL6ST/CD28/VCAM1/CTLA4/HAVCR2	12	BP
GO:0032944	regulation of mononuclear cell proliferation	12/101	227/18723	3.47795e-09	7.7056e-07	5.65422e-07	CCL5/ANXA1/CD300A/TFRC/PELI1/LGALS3/TNFSF4/IL6ST/CD28/VCAM1/CTLA4/HAVCR2	12	BP
GO:0002695	negative regulation of leukocyte activation	11/101	187/18723	5.34802e-09	1.0664e-06	7.825e-07	FGR/CST7/ANXA1/CD300A/PELI1/PAG1/LGALS3/TNFSF4/SAMSN1/CTLA4/HAVCR2	11	BP
GO:0002285	lymphocyte activation involved in immune response	11/101	194/18723	7.85358e-09	1.36326e-06	1.00033e-06	KLRC2/CD244/ANXA1/TFRC/LGALS3/TNFSF4/BATF/ITM2A/CD28/HLA-DRA/HAVCR2	11	BP
GO:0070663	regulation of leukocyte proliferation	12/101	245/18723	8.20415e-09	1.36326e-06	1.00033e-06	CCL5/ANXA1/CD300A/TFRC/PELI1/LGALS3/TNFSF4/IL6ST/CD28/VCAM1/CTLA4/HAVCR2	12	BP
GO:0042098	T cell proliferation	11/101	199/18723	1.0238e-08	1.57036e-06	1.1523e-06	CCL5/ANXA1/TFRC/PELI1/LGALS3/TNFSF4/IL6ST/CD28/VCAM1/CTLA4/HAVCR2	11	BP
GO:0051250	negative regulation of lymphocyte activation	10/101	157/18723	1.28744e-08	1.83368e-06	1.34552e-06	FGR/ANXA1/CD300A/PELI1/PAG1/LGALS3/TNFSF4/SAMSN1/CTLA4/HAVCR2	10	BP
GO:0050866	negative regulation of cell activation	11/101	210/18723	1.78888e-08	2.37802e-06	1.74495e-06	FGR/CST7/ANXA1/CD300A/PELI1/PAG1/LGALS3/TNFSF4/SAMSN1/CTLA4/HAVCR2	11	BP
GO:0001909	leukocyte mediated cytotoxicity	9/101	124/18723	2.28815e-08	2.85161e-06	2.09245e-06	KLRD1/SLAMF7/CD160/CX3CR1/KLRC2/PRF1/LYST/HLA-DRA/HAVCR2	9	BP
GO:0002703	regulation of leukocyte mediated immunity	11/101	226/18723	3.80959e-08	4.46842e-06	3.27884e-06	KLRD1/CD160/CX3CR1/FGR/KLRC2/CD300A/TFRC/TNFSF4/CD28/HLA-DRA/HAVCR2	11	BP
GO:0046651	lymphocyte proliferation	12/101	288/18723	4.92182e-08	5.03509e-06	3.69465e-06	CCL5/ANXA1/CD300A/TFRC/PELI1/LGALS3/TNFSF4/IL6ST/CD28/VCAM1/CTLA4/HAVCR2	12	BP
GO:0050671	positive regulation of lymphocyte proliferation	9/101	137/18723	5.45314e-08	5.03509e-06	3.69465e-06	CCL5/ANXA1/TFRC/PELI1/TNFSF4/IL6ST/CD28/VCAM1/HAVCR2	9	BP
GO:0032943	mononuclear cell proliferation	12/101	291/18723	5.5134e-08	5.03509e-06	3.69465e-06	CCL5/ANXA1/CD300A/TFRC/PELI1/LGALS3/TNFSF4/IL6ST/CD28/VCAM1/CTLA4/HAVCR2	12	BP
GO:0002819	regulation of adaptive immune response	10/101	183/18723	5.54002e-08	5.03509e-06	3.69465e-06	KLRD1/CD160/ANXA1/TFRC/TNFSF4/IL6ST/CD28/HLA-DRA/SAMSN1/HAVCR2	10	BP
GO:0002699	positive regulation of immune effector process	11/101	235/18723	5.67905e-08	5.03509e-06	3.69465e-06	KLRD1/CD160/FGR/KLRC2/CD244/ANXA1/CD300A/TFRC/TNFSF4/CD28/HLA-DRA	11	BP
GO:0032946	positive regulation of mononuclear cell proliferation	9/101	138/18723	5.80778e-08	5.03509e-06	3.69465e-06	CCL5/ANXA1/TFRC/PELI1/TNFSF4/IL6ST/CD28/VCAM1/HAVCR2	9	BP
GO:0042102	positive regulation of T cell proliferation	8/101	101/18723	7.2369e-08	6.01266e-06	4.41197e-06	CCL5/ANXA1/TFRC/TNFSF4/IL6ST/CD28/VCAM1/HAVCR2	8	BP
GO:0022408	negative regulation of cell-cell adhesion	10/101	196/18723	1.05641e-07	8.42596e-06	6.18281e-06	MBP/ANXA1/CD300A/PELI1/PAG1/LGALS3/TNFSF4/RGCC/CTLA4/HAVCR2	10	BP
GO:0070665	positive regulation of leukocyte proliferation	9/101	150/18723	1.19191e-07	9.14104e-06	6.70752e-06	CCL5/ANXA1/TFRC/PELI1/TNFSF4/IL6ST/CD28/VCAM1/HAVCR2	9	BP
GO:0002698	negative regulation of immune effector process	8/101	110/18723	1.40988e-07	1.04122e-05	7.64027e-06	KLRD1/CX3CR1/A2M/ANXA1/CD300A/LGALS3/TNFSF4/HAVCR2	8	BP
GO:0050868	negative regulation of T cell activation	8/101	122/18723	3.14225e-07	2.23773e-05	1.642e-05	ANXA1/CD300A/PELI1/PAG1/LGALS3/TNFSF4/CTLA4/HAVCR2	8	BP
GO:0002274	myeloid leukocyte activation	10/101	223/18723	3.50532e-07	2.41021e-05	1.76856e-05	CCL5/CX3CR1/FGR/CST7/PTGDR/CD300A/NAMPT/BATF/RBPJ/HAVCR2	10	BP
GO:0006968	cellular defense response	6/101	54/18723	4.44228e-07	2.95264e-05	2.16659e-05	CX3CR1/KLRG1/KLRC3/KLRC2/PRF1/TRAT1	6	BP
GO:0045066	regulatory T cell differentiation	5/101	31/18723	6.28368e-07	4.04183e-05	2.96581e-05	TOX/TNFSF4/CD28/HLA-DRA/CTLA4	5	BP
GO:0001906	cell killing	9/101	188/18723	8.08106e-07	5.03551e-05	3.69496e-05	KLRD1/SLAMF7/CD160/CX3CR1/KLRC2/PRF1/LYST/HLA-DRA/HAVCR2	9	BP
GO:1903038	negative regulation of leukocyte cell-cell adhesion	8/101	141/18723	9.4973e-07	5.73867e-05	4.21093e-05	ANXA1/CD300A/PELI1/PAG1/LGALS3/TNFSF4/CTLA4/HAVCR2	8	BP
GO:0070232	regulation of T cell apoptotic process	5/101	34/18723	1.01594e-06	5.9582e-05	4.37201e-05	CCL5/HIF1A/LGALS3/PDCD1/CD27	5	BP
GO:0031341	regulation of cell killing	7/101	99/18723	1.06866e-06	6.0883e-05	4.46748e-05	KLRD1/CD160/CX3CR1/KLRC2/PRF1/HLA-DRA/HAVCR2	7	BP
GO:0042267	natural killer cell mediated cytotoxicity	6/101	68/18723	1.7714e-06	9.8116e-05	7.19956e-05	KLRD1/SLAMF7/CD160/KLRC2/LYST/HAVCR2	6	BP
GO:0046631	alpha-beta T cell activation	8/101	156/18723	2.03532e-06	0.000109687	8.04865e-05	CD160/ANXA1/CD300A/TOX/TNFSF4/BATF/CD28/HLA-DRA	8	BP
GO:0002381	immunoglobulin production involved in immunoglobulin-mediated immune response	6/101	70/18723	2.10362e-06	0.000110385	8.09982e-05	TFRC/HLA-DQA1/TNFSF4/BATF/CD28/HLA-DRA	6	BP
GO:0002228	natural killer cell mediated immunity	6/101	71/18723	2.28784e-06	0.000116973	8.58325e-05	KLRD1/SLAMF7/CD160/KLRC2/LYST/HAVCR2	6	BP
GO:0002708	positive regulation of lymphocyte mediated immunity	7/101	113/18723	2.60697e-06	0.000129958	9.53603e-05	KLRD1/CD160/KLRC2/TFRC/TNFSF4/CD28/HLA-DRA	7	BP
GO:0045088	regulation of innate immune response	9/101	218/18723	2.75524e-06	0.000133999	9.83258e-05	KLRD1/CCL5/CD160/FGR/A2M/KLRC2/LYAR/BIRC3/HAVCR2	9	BP
GO:0002706	regulation of lymphocyte mediated immunity	8/101	168/18723	3.53856e-06	0.000167997	0.000123273	KLRD1/CD160/KLRC2/TFRC/TNFSF4/CD28/HLA-DRA/HAVCR2	8	BP
GO:2000106	regulation of leukocyte apoptotic process	6/101	81/18723	4.96387e-06	0.000230185	0.000168905	CCL5/ANXA1/HIF1A/LGALS3/PDCD1/CD27	6	BP
GO:0001910	regulation of leukocyte mediated cytotoxicity	6/101	82/18723	5.33254e-06	0.000241661	0.000177326	KLRD1/CD160/CX3CR1/KLRC2/HLA-DRA/HAVCR2	6	BP
GO:0070231	T cell apoptotic process	5/101	50/18723	7.22487e-06	0.000320142	0.000234914	CCL5/HIF1A/LGALS3/PDCD1/CD27	5	BP
GO:0030101	natural killer cell activation	6/101	88/18723	8.04065e-06	0.000335641	0.000246287	SLAMF7/FGR/KLRC2/CD244/TOX/HAVCR2	6	BP
GO:0070098	chemokine-mediated signaling pathway	6/101	88/18723	8.04065e-06	0.000335641	0.000246287	CCL5/CX3CR1/XCL2/HIF1A/CXCR6/CXCL13	6	BP
GO:0002705	positive regulation of leukocyte mediated immunity	7/101	134/18723	8.07962e-06	0.000335641	0.000246287	KLRD1/CD160/KLRC2/TFRC/TNFSF4/CD28/HLA-DRA	7	BP
GO:0043547	positive regulation of GTPase activity	9/101	255/18723	9.82509e-06	0.000399821	0.000293381	CCL5/XCL2/S1PR1/GPR65/SNX9/TIAM1/RGS1/TBC1D4/CXCL13	9	BP
GO:0030217	T cell differentiation	9/101	257/18723	1.04595e-05	0.000414498	0.00030415	CD8A/ANXA1/TOX/TNFSF4/BATF/CD28/HLA-DRA/CTLA4/CD27	9	BP
GO:0070228	regulation of lymphocyte apoptotic process	5/101	54/18723	1.06015e-05	0.000414498	0.00030415	CCL5/HIF1A/LGALS3/PDCD1/CD27	5	BP
GO:0071674	mononuclear cell migration	8/101	196/18723	1.0998e-05	0.000421732	0.000309459	CCL5/CX3CR1/GPR15/ANXA1/XCL2/S1PR1/LGALS3/CXCL13	8	BP
GO:0050864	regulation of B cell activation	8/101	198/18723	1.18412e-05	0.000445496	0.000326896	CD300A/TFRC/PELI1/TNFSF4/CD28/SAMSN1/CTLA4/CD27	8	BP
GO:1990868	response to chemokine	6/101	97/18723	1.40997e-05	0.000504159	0.000369942	CCL5/CX3CR1/XCL2/HIF1A/CXCR6/CXCL13	6	BP
GO:1990869	cellular response to chemokine	6/101	97/18723	1.40997e-05	0.000504159	0.000369942	CCL5/CX3CR1/XCL2/HIF1A/CXCR6/CXCL13	6	BP
GO:0045580	regulation of T cell differentiation	7/101	146/18723	1.41589e-05	0.000504159	0.000369942	ANXA1/TOX/TNFSF4/CD28/HLA-DRA/CTLA4/CD27	7	BP
GO:0045589	regulation of regulatory T cell differentiation	4/101	28/18723	1.47846e-05	0.000517202	0.000379513	TNFSF4/CD28/HLA-DRA/CTLA4	4	BP
GO:0002820	negative regulation of adaptive immune response	5/101	59/18723	1.64285e-05	0.0005648	0.000414439	KLRD1/CD160/TNFSF4/SAMSN1/HAVCR2	5	BP
GO:0002685	regulation of leukocyte migration	8/101	210/18723	1.81305e-05	0.000612751	0.000449625	CCL5/CX3CR1/ANXA1/XCL2/CD300A/LGALS3/TNFRSF18/CXCL13	8	BP
GO:0035710	CD4-positive, alpha-beta T cell activation	6/101	102/18723	1.88007e-05	0.000624809	0.000458473	CD160/ANXA1/TOX/TNFSF4/BATF/HLA-DRA	6	BP
GO:0061384	heart trabecula morphogenesis	4/101	30/18723	1.96254e-05	0.000641527	0.00047074	TGFBR3/S1PR1/FKBP1A/RBPJ	4	BP
GO:0046634	regulation of alpha-beta T cell activation	6/101	104/18723	2.10028e-05	0.000675477	0.000495652	CD160/ANXA1/CD300A/TNFSF4/CD28/HLA-DRA	6	BP
GO:0031343	positive regulation of cell killing	5/101	63/18723	2.26751e-05	0.000717686	0.000526624	KLRD1/CD160/KLRC2/PRF1/HLA-DRA	5	BP
GO:0071887	leukocyte apoptotic process	6/101	106/18723	2.34082e-05	0.000729312	0.000535155	CCL5/ANXA1/HIF1A/LGALS3/PDCD1/CD27	6	BP
GO:0071677	positive regulation of mononuclear cell migration	5/101	65/18723	2.64203e-05	0.000810493	0.000594724	CCL5/CX3CR1/XCL2/LGALS3/CXCL13	5	BP
GO:0002429	immune response-activating cell surface receptor signaling pathway	9/101	291/18723	2.79873e-05	0.000832935	0.000611191	KLRD1/CD160/FGR/KLRC2/CD300A/TRAT1/LGALS3/CD28/CTLA4	9	BP
GO:0002757	immune response-activating signal transduction	9/101	291/18723	2.79873e-05	0.000832935	0.000611191	KLRD1/CD160/FGR/KLRC2/CD300A/TRAT1/LGALS3/CD28/CTLA4	9	BP
GO:0072678	T cell migration	5/101	66/18723	2.84643e-05	0.000834673	0.000612467	CCL5/GPR15/XCL2/S1PR1/CXCL13	5	BP
GO:0046635	positive regulation of alpha-beta T cell activation	5/101	67/18723	3.0629e-05	0.000885133	0.000649493	CD160/ANXA1/TNFSF4/CD28/HLA-DRA	5	BP
GO:0030595	leukocyte chemotaxis	8/101	230/18723	3.47765e-05	0.000978918	0.000718311	CCL5/CX3CR1/ANXA1/XCL2/S1PR1/LGALS3/LYST/CXCL13	8	BP
GO:0002822	regulation of adaptive immune response based on somatic recombination of immune receptors built from immunoglobulin superfamily domains	7/101	168/18723	3.50134e-05	0.000978918	0.000718311	KLRD1/ANXA1/TFRC/TNFSF4/CD28/HLA-DRA/HAVCR2	7	BP
GO:0002286	T cell activation involved in immune response	6/101	114/18723	3.53471e-05	0.000978918	0.000718311	ANXA1/LGALS3/TNFSF4/BATF/HLA-DRA/HAVCR2	6	BP
GO:0032814	regulation of natural killer cell activation	4/101	35/18723	3.67284e-05	0.00100324	0.000736157	FGR/KLRC2/TOX/HAVCR2	4	BP
GO:0002548	monocyte chemotaxis	5/101	70/18723	3.78968e-05	0.00102117	0.000749311	CCL5/CX3CR1/ANXA1/XCL2/LGALS3	5	BP
GO:0070227	lymphocyte apoptotic process	5/101	72/18723	4.34385e-05	0.00114901	0.00084312	CCL5/HIF1A/LGALS3/PDCD1/CD27	5	BP
GO:0045619	regulation of lymphocyte differentiation	7/101	174/18723	4.37937e-05	0.00114901	0.00084312	ANXA1/TOX/TNFSF4/CD28/HLA-DRA/CTLA4/CD27	7	BP
GO:0001771	immunological synapse formation	3/101	14/18723	5.31164e-05	0.00137551	0.00100932	PRF1/LGALS3/HAVCR2	3	BP
GO:0050852	T cell receptor signaling pathway	6/101	123/18723	5.41656e-05	0.0013847	0.00101606	CD160/CD300A/TRAT1/LGALS3/CD28/CTLA4	6	BP
GO:0002347	response to tumor cell	4/101	39/18723	5.6749e-05	0.00141447	0.00103791	CD160/PRF1/ABI3/HAVCR2	4	BP
GO:2000516	positive regulation of CD4-positive, alpha-beta T cell activation	4/101	39/18723	5.6749e-05	0.00141447	0.00103791	CD160/ANXA1/TNFSF4/HLA-DRA	4	BP
GO:0048644	muscle organ morphogenesis	5/101	77/18723	6.00481e-05	0.00147822	0.00108469	TGFBR3/S1PR1/FKBP1A/ARID5B/RBPJ	5	BP
GO:0010820	positive regulation of T cell chemotaxis	3/101	15/18723	6.61354e-05	0.00158884	0.00116586	CCL5/XCL2/CXCL13	3	BP
GO:0045064	T-helper 2 cell differentiation	3/101	15/18723	6.61354e-05	0.00158884	0.00116586	ANXA1/TNFSF4/BATF	3	BP
GO:0050856	regulation of T cell receptor signaling pathway	4/101	41/18723	6.92957e-05	0.00164495	0.00120703	CD160/CD300A/TRAT1/LGALS3	4	BP
GO:0031348	negative regulation of defense response	8/101	258/18723	7.80946e-05	0.00183201	0.00134429	KLRD1/AOAH/FGR/A2M/LYAR/CST7/ACP5/HAVCR2	8	BP
GO:0010819	regulation of T cell chemotaxis	3/101	16/18723	8.10787e-05	0.00186059	0.00136527	CCL5/XCL2/CXCL13	3	BP
GO:0002312	B cell activation involved in immune response	5/101	82/18723	8.11793e-05	0.00186059	0.00136527	TFRC/TNFSF4/BATF/ITM2A/CD28	5	BP
GO:0061383	trabecula morphogenesis	4/101	43/18723	8.37502e-05	0.0018977	0.0013925	TGFBR3/S1PR1/FKBP1A/RBPJ	4	BP
GO:0043367	CD4-positive, alpha-beta T cell differentiation	5/101	83/18723	8.60163e-05	0.00192715	0.00141411	ANXA1/TOX/TNFSF4/BATF/HLA-DRA	5	BP
GO:0002687	positive regulation of leukocyte migration	6/101	135/18723	9.08991e-05	0.00198848	0.00145911	CCL5/CX3CR1/XCL2/LGALS3/TNFRSF18/CXCL13	6	BP
GO:0031295	T cell costimulation	4/101	44/18723	9.17453e-05	0.00198848	0.00145911	CD160/TNFSF4/CD28/ICOS	4	BP
GO:0042269	regulation of natural killer cell mediated cytotoxicity	4/101	44/18723	9.17453e-05	0.00198848	0.00145911	KLRD1/CD160/KLRC2/HAVCR2	4	BP
GO:0090713	immunological memory process	3/101	17/18723	9.80672e-05	0.00210265	0.00154288	CD160/TNFSF4/HLA-DRA	3	BP
GO:0031294	lymphocyte costimulation	4/101	46/18723	0.000109379	0.00232022	0.00170253	CD160/TNFSF4/CD28/ICOS	4	BP
GO:0050921	positive regulation of chemotaxis	6/101	141/18723	0.00011553	0.00242492	0.00177936	CCL5/CX3CR1/XCL2/S1PR1/TIAM1/CXCL13	6	BP
GO:0002544	chronic inflammatory response	3/101	18/18723	0.00011722	0.00243476	0.00178658	CCL5/VCAM1/CXCL13	3	BP
GO:0002715	regulation of natural killer cell mediated immunity	4/101	48/18723	0.000129349	0.00262744	0.00192797	KLRD1/CD160/KLRC2/HAVCR2	4	BP
GO:0016064	immunoglobulin mediated immune response	7/101	207/18723	0.000130355	0.00262744	0.00192797	TFRC/HLA-DQA1/TNFSF4/BATF/CD28/HLA-DRA/CD27	7	BP
GO:0031349	positive regulation of defense response	8/101	278/18723	0.000130969	0.00262744	0.00192797	KLRD1/CCL5/CD160/KLRC2/TNFSF4/IL6ST/CD28/HAVCR2	8	BP
GO:0002275	myeloid cell activation involved in immune response	5/101	91/18723	0.000133162	0.00262744	0.00192797	CX3CR1/FGR/PTGDR/CD300A/HAVCR2	5	BP
GO:0070233	negative regulation of T cell apoptotic process	3/101	19/18723	0.000138654	0.00262744	0.00192797	CCL5/HIF1A/CD27	3	BP
GO:0140131	positive regulation of lymphocyte chemotaxis	3/101	19/18723	0.000138654	0.00262744	0.00192797	CCL5/XCL2/CXCL13	3	BP
GO:0007189	adenylate cyclase-activating G protein-coupled receptor signaling pathway	6/101	146/18723	0.000139869	0.00262744	0.00192797	PTGER2/S1PR5/S1PR1/ADGRG1/GPR65/ADRB2	6	BP
GO:0002204	somatic recombination of immunoglobulin genes involved in immune response	4/101	49/18723	0.000140266	0.00262744	0.00192797	TFRC/TNFSF4/BATF/CD28	4	BP
GO:0002208	somatic diversification of immunoglobulins involved in immune response	4/101	49/18723	0.000140266	0.00262744	0.00192797	TFRC/TNFSF4/BATF/CD28	4	BP
GO:0045190	isotype switching	4/101	49/18723	0.000140266	0.00262744	0.00192797	TFRC/TNFSF4/BATF/CD28	4	BP
GO:0007249	I-kappaB kinase/NF-kappaB signaling	8/101	281/18723	0.000140991	0.00262744	0.00192797	CX3CR1/TFRC/PELI1/TNFSF10/FKBP1A/TANK/BIRC3/NDFIP2	8	BP
GO:0019724	B cell mediated immunity	7/101	210/18723	0.000142498	0.00263093	0.00193053	TFRC/HLA-DQA1/TNFSF4/BATF/CD28/HLA-DRA/CD27	7	BP
GO:0097530	granulocyte migration	6/101	148/18723	0.000150672	0.00275633	0.00202254	CCL5/ANXA1/XCL2/CD300A/LGALS3/CXCL13	6	BP
GO:0097529	myeloid leukocyte migration	7/101	220/18723	0.000189775	0.0034401	0.00252428	CCL5/CX3CR1/ANXA1/XCL2/CD300A/LGALS3/CXCL13	7	BP
GO:2000179	positive regulation of neural precursor cell proliferation	4/101	54/18723	0.000205087	0.00368418	0.00270338	CX3CR1/ADGRG1/TOX/HIF1A	4	BP
GO:0003229	ventricular cardiac muscle tissue development	4/101	55/18723	0.000220262	0.00392144	0.00287748	HOPX/TGFBR3/FKBP1A/RBPJ	4	BP
GO:0001912	positive regulation of leukocyte mediated cytotoxicity	4/101	56/18723	0.000236228	0.00416849	0.00305875	KLRD1/CD160/KLRC2/HLA-DRA	4	BP
GO:0045621	positive regulation of lymphocyte differentiation	5/101	104/18723	0.000249173	0.00428832	0.00314669	ANXA1/TOX/TNFSF4/HLA-DRA/CD27	5	BP
GO:0034695	response to prostaglandin E	3/101	23/18723	0.000249471	0.00428832	0.00314669	PTGER2/TGFBR3/TNFSF4	3	BP
GO:0072677	eosinophil migration	3/101	23/18723	0.000249471	0.00428832	0.00314669	CCL5/CD300A/LGALS3	3	BP
GO:0016447	somatic recombination of immunoglobulin gene segments	4/101	57/18723	0.000253011	0.004312	0.00316406	TFRC/TNFSF4/BATF/CD28	4	BP
GO:0007188	adenylate cyclase-modulating G protein-coupled receptor signaling pathway	7/101	233/18723	0.00026942	0.00455274	0.00334071	PTGER2/S1PR5/S1PR1/ADGRG1/GPR65/ADRB2/RGS1	7	BP
GO:0001911	negative regulation of leukocyte mediated cytotoxicity	3/101	24/18723	0.000283995	0.00472573	0.00346764	KLRD1/CX3CR1/HAVCR2	3	BP
GO:0031532	actin cytoskeleton reorganization	5/101	107/18723	0.000284397	0.00472573	0.00346764	PLEK/ANXA1/ABI3/S1PR1/GPR65	5	BP
GO:0055008	cardiac muscle tissue morphogenesis	4/101	60/18723	0.000308498	0.00506502	0.00371661	TGFBR3/S1PR1/FKBP1A/RBPJ	4	BP
GO:0002456	T cell mediated immunity	5/101	109/18723	0.000309896	0.00506502	0.00371661	CD8A/KLRD1/PRF1/TNFSF4/HLA-DRA	5	BP
GO:0032753	positive regulation of interleukin-4 production	3/101	25/18723	0.000321461	0.0051693	0.00379313	TNFSF4/CD28/HAVCR2	3	BP
GO:1901623	regulation of lymphocyte chemotaxis	3/101	25/18723	0.000321461	0.0051693	0.00379313	CCL5/XCL2/CXCL13	3	BP
GO:0002821	positive regulation of adaptive immune response	5/101	112/18723	0.00035135	0.00556025	0.00408	TFRC/TNFSF4/IL6ST/CD28/HLA-DRA	5	BP
GO:0046632	alpha-beta T cell differentiation	5/101	112/18723	0.00035135	0.00556025	0.00408	ANXA1/TOX/TNFSF4/BATF/HLA-DRA	5	BP
GO:0002418	immune response to tumor cell	3/101	26/18723	0.000361971	0.00559511	0.00410558	CD160/PRF1/HAVCR2	3	BP
GO:0045954	positive regulation of natural killer cell mediated cytotoxicity	3/101	26/18723	0.000361971	0.00559511	0.00410558	KLRD1/CD160/KLRC2	3	BP
GO:2000108	positive regulation of leukocyte apoptotic process	3/101	26/18723	0.000361971	0.00559511	0.00410558	CCL5/ANXA1/PDCD1	3	BP
GO:0002704	negative regulation of leukocyte mediated immunity	4/101	63/18723	0.000372211	0.00562443	0.00412709	KLRD1/CX3CR1/CD300A/HAVCR2	4	BP
GO:0050854	regulation of antigen receptor-mediated signaling pathway	4/101	63/18723	0.000372211	0.00562443	0.00412709	CD160/CD300A/TRAT1/LGALS3	4	BP
GO:0048771	tissue remodeling	6/101	175/18723	0.000372329	0.00562443	0.00412709	S1PR1/ADRB2/TFRC/HIF1A/ACP5/RBPJ	6	BP
GO:0030888	regulation of B cell proliferation	4/101	64/18723	0.000395392	0.00590379	0.00433208	CD300A/TFRC/PELI1/CTLA4	4	BP
GO:0071675	regulation of mononuclear cell migration	5/101	115/18723	0.00039687	0.00590379	0.00433208	CCL5/CX3CR1/XCL2/LGALS3/CXCL13	5	BP
GO:0043122	regulation of I-kappaB kinase/NF-kappaB signaling	7/101	249/18723	0.000402265	0.00590379	0.00433208	TFRC/PELI1/TNFSF10/FKBP1A/TANK/BIRC3/NDFIP2	7	BP
GO:0002825	regulation of T-helper 1 type immune response	3/101	27/18723	0.000405626	0.00590379	0.00433208	ANXA1/TNFSF4/HAVCR2	3	BP
GO:0045830	positive regulation of isotype switching	3/101	27/18723	0.000405626	0.00590379	0.00433208	TFRC/TNFSF4/CD28	3	BP
GO:0045453	bone resorption	4/101	65/18723	0.000419587	0.00606273	0.00444871	S1PR1/ADRB2/TFRC/ACP5	4	BP
GO:0002702	positive regulation of production of molecular mediator of immune response	5/101	117/18723	0.000429601	0.00611875	0.00448982	CD160/CD244/TFRC/TNFSF4/CD28	5	BP
GO:0072676	lymphocyte migration	5/101	117/18723	0.000429601	0.00611875	0.00448982	CCL5/GPR15/XCL2/S1PR1/CXCL13	5	BP
GO:0002562	somatic diversification of immune receptors via germline recombination within a single locus	4/101	66/18723	0.000444821	0.00620261	0.00455135	TFRC/TNFSF4/BATF/CD28	4	BP
GO:0016444	somatic cell DNA recombination	4/101	66/18723	0.000444821	0.00620261	0.00455135	TFRC/TNFSF4/BATF/CD28	4	BP
GO:0042093	T-helper cell differentiation	4/101	66/18723	0.000444821	0.00620261	0.00455135	ANXA1/TNFSF4/BATF/HLA-DRA	4	BP
GO:0010818	T cell chemotaxis	3/101	28/18723	0.000452527	0.00622303	0.00456634	CCL5/XCL2/CXCL13	3	BP
GO:0031342	negative regulation of cell killing	3/101	28/18723	0.000452527	0.00622303	0.00456634	KLRD1/CX3CR1/HAVCR2	3	BP
GO:0016445	somatic diversification of immunoglobulins	4/101	67/18723	0.000471119	0.00639055	0.00468926	TFRC/TNFSF4/BATF/CD28	4	BP
GO:2000514	regulation of CD4-positive, alpha-beta T cell activation	4/101	67/18723	0.000471119	0.00639055	0.00468926	CD160/ANXA1/TNFSF4/HLA-DRA	4	BP
GO:0002294	CD4-positive, alpha-beta T cell differentiation involved in immune response	4/101	68/18723	0.000498506	0.00668351	0.00490423	ANXA1/TNFSF4/BATF/HLA-DRA	4	BP
GO:0001773	myeloid dendritic cell activation	3/101	29/18723	0.000502771	0.00668351	0.00490423	BATF/RBPJ/HAVCR2	3	BP
GO:2000406	positive regulation of T cell migration	3/101	29/18723	0.000502771	0.00668351	0.00490423	CCL5/XCL2/CXCL13	3	BP
GO:0043123	positive regulation of I-kappaB kinase/NF-kappaB signaling	6/101	186/18723	0.000514501	0.00679415	0.00498541	TFRC/PELI1/TNFSF10/FKBP1A/BIRC3/NDFIP2	6	BP
GO:0002287	alpha-beta T cell activation involved in immune response	4/101	69/18723	0.000527009	0.00686834	0.00503985	ANXA1/TNFSF4/BATF/HLA-DRA	4	BP
GO:0002293	alpha-beta T cell differentiation involved in immune response	4/101	69/18723	0.000527009	0.00686834	0.00503985	ANXA1/TNFSF4/BATF/HLA-DRA	4	BP
GO:0034694	response to prostaglandin	3/101	30/18723	0.000556454	0.00706984	0.00518771	PTGER2/TGFBR3/TNFSF4	3	BP
GO:0050858	negative regulation of antigen receptor-mediated signaling pathway	3/101	30/18723	0.000556454	0.00706984	0.00518771	CD160/CD300A/LGALS3	3	BP
GO:0070229	negative regulation of lymphocyte apoptotic process	3/101	30/18723	0.000556454	0.00706984	0.00518771	CCL5/HIF1A/CD27	3	BP
GO:0060415	muscle tissue morphogenesis	4/101	70/18723	0.000556652	0.00706984	0.00518771	TGFBR3/S1PR1/FKBP1A/RBPJ	4	BP
GO:0071621	granulocyte chemotaxis	5/101	125/18723	0.000581282	0.00727577	0.00533881	CCL5/ANXA1/XCL2/LGALS3/CXCL13	5	BP
GO:0003208	cardiac ventricle morphogenesis	4/101	71/18723	0.000587462	0.00727577	0.00533881	TGFBR3/HIF1A/FKBP1A/RBPJ	4	BP
GO:0032722	positive regulation of chemokine production	4/101	71/18723	0.000587462	0.00727577	0.00533881	MBP/HIF1A/TNFSF4/HAVCR2	4	BP
GO:0045824	negative regulation of innate immune response	4/101	71/18723	0.000587462	0.00727577	0.00533881	KLRD1/A2M/LYAR/HAVCR2	4	BP
GO:0002717	positive regulation of natural killer cell mediated immunity	3/101	31/18723	0.00061367	0.00755345	0.00554257	KLRD1/CD160/KLRC2	3	BP
GO:0032729	positive regulation of interferon-gamma production	4/101	72/18723	0.000619463	0.00757797	0.00556057	CD160/CD244/TNFSF4/HAVCR2	4	BP
GO:0043299	leukocyte degranulation	4/101	73/18723	0.000652682	0.00793566	0.00582303	FGR/KLRC2/PTGDR/CD300A	4	BP
GO:0043372	positive regulation of CD4-positive, alpha-beta T cell differentiation	3/101	32/18723	0.000674511	0.00815137	0.00598131	ANXA1/TNFSF4/HLA-DRA	3	BP
GO:0045089	positive regulation of innate immune response	5/101	131/18723	0.000719083	0.00863123	0.00633343	KLRD1/CCL5/CD160/KLRC2/HAVCR2	5	BP
GO:0002292	T cell differentiation involved in immune response	4/101	75/18723	0.000722876	0.00863123	0.00633343	ANXA1/TNFSF4/BATF/HLA-DRA	4	BP
GO:0032633	interleukin-4 production	3/101	33/18723	0.000739068	0.00872013	0.00639866	TNFSF4/CD28/HAVCR2	3	BP
GO:0032673	regulation of interleukin-4 production	3/101	33/18723	0.000739068	0.00872013	0.00639866	TNFSF4/CD28/HAVCR2	3	BP
GO:1902105	regulation of leukocyte differentiation	7/101	279/18723	0.000789657	0.00926221	0.00679643	ANXA1/TOX/TNFSF4/CD28/HLA-DRA/CTLA4/CD27	7	BP
GO:0002200	somatic diversification of immune receptors	4/101	77/18723	0.000798252	0.00930827	0.00683022	TFRC/TNFSF4/BATF/CD28	4	BP
GO:0050869	negative regulation of B cell activation	3/101	34/18723	0.00080743	0.00936055	0.00686859	CD300A/SAMSN1/CTLA4	3	BP
GO:2000403	positive regulation of lymphocyte migration	3/101	35/18723	0.000879683	0.0101392	0.00743997	CCL5/XCL2/CXCL13	3	BP
GO:1903322	positive regulation of protein modification by small protein conjugation or removal	5/101	138/18723	0.000909204	0.0104193	0.00764545	PELI1/FKBP1A/TANK/BIRC3/NDFIP2	5	BP
GO:0042092	type 2 immune response	3/101	36/18723	0.000955913	0.0108301	0.00794689	ANXA1/TNFSF4/BATF	3	BP
GO:0045191	regulation of isotype switching	3/101	36/18723	0.000955913	0.0108301	0.00794689	TFRC/TNFSF4/CD28	3	BP
GO:0050672	negative regulation of lymphocyte proliferation	4/101	83/18723	0.00105754	0.0119137	0.00874207	CD300A/PELI1/CTLA4/HAVCR2	4	BP
GO:0070555	response to interleukin-1	5/101	143/18723	0.0010663	0.0119449	0.00876494	CCL5/ANXA1/XCL2/HIF1A/TANK	5	BP
GO:0010921	regulation of phosphatase activity	4/101	84/18723	0.00110586	0.0122505	0.00898917	PLEK/CD300A/FKBP1A/LGALS3	4	BP
GO:0032945	negative regulation of mononuclear cell proliferation	4/101	84/18723	0.00110586	0.0122505	0.00898917	CD300A/PELI1/CTLA4/HAVCR2	4	BP
GO:0002377	immunoglobulin production	6/101	216/18723	0.00112144	0.0123545	0.00906546	TFRC/HLA-DQA1/TNFSF4/BATF/CD28/HLA-DRA	6	BP
GO:0045622	regulation of T-helper cell differentiation	3/101	39/18723	0.0012093	0.0132491	0.00972193	ANXA1/TNFSF4/HLA-DRA	3	BP
GO:2000177	regulation of neural precursor cell proliferation	4/101	87/18723	0.00126011	0.0133697	0.0098104	CX3CR1/ADGRG1/TOX/HIF1A	4	BP
GO:0002291	T cell activation via T cell receptor contact with antigen bound to MHC molecule on antigen presenting cell	2/101	10/18723	0.00126053	0.0133697	0.0098104	LGALS3/HAVCR2	2	BP
GO:0002887	negative regulation of myeloid leukocyte mediated immunity	2/101	10/18723	0.00126053	0.0133697	0.0098104	CX3CR1/CD300A	2	BP
GO:0040015	negative regulation of multicellular organism growth	2/101	10/18723	0.00126053	0.0133697	0.0098104	PLAC8/ADRB2	2	BP
GO:0045625	regulation of T-helper 1 cell differentiation	2/101	10/18723	0.00126053	0.0133697	0.0098104	ANXA1/TNFSF4	2	BP
GO:0070099	regulation of chemokine-mediated signaling pathway	2/101	10/18723	0.00126053	0.0133697	0.0098104	CCL5/HIF1A	2	BP
GO:0002714	positive regulation of B cell mediated immunity	3/101	40/18723	0.00130226	0.0136668	0.0100285	TFRC/TNFSF4/CD28	3	BP
GO:0002891	positive regulation of immunoglobulin mediated immune response	3/101	40/18723	0.00130226	0.0136668	0.0100285	TFRC/TNFSF4/CD28	3	BP
GO:0050920	regulation of chemotaxis	6/101	223/18723	0.00132053	0.013786	0.0101159	CCL5/CX3CR1/XCL2/S1PR1/TIAM1/CXCL13	6	BP
GO:0050871	positive regulation of B cell activation	5/101	152/18723	0.00139867	0.0145258	0.0106587	TFRC/PELI1/TNFSF4/CD28/CD27	5	BP
GO:0046849	bone remodeling	4/101	90/18723	0.00142882	0.0146859	0.0107762	S1PR1/ADRB2/TFRC/ACP5	4	BP
GO:0070664	negative regulation of leukocyte proliferation	4/101	90/18723	0.00142882	0.0146859	0.0107762	CD300A/PELI1/CTLA4/HAVCR2	4	BP
GO:0045582	positive regulation of T cell differentiation	4/101	91/18723	0.00148839	0.0152197	0.0111679	ANXA1/TNFSF4/HLA-DRA/CD27	4	BP
GO:2000404	regulation of T cell migration	3/101	42/18723	0.00150139	0.0152301	0.0111756	CCL5/XCL2/CXCL13	3	BP
GO:0071356	cellular response to tumor necrosis factor	6/101	229/18723	0.00151177	0.0152301	0.0111756	CCL5/XCL2/TANK/BIRC3/VCAM1/TNFRSF18	6	BP
GO:0002357	defense response to tumor cell	2/101	11/18723	0.00153523	0.0152301	0.0111756	PRF1/ABI3	2	BP
GO:0033625	positive regulation of integrin activation	2/101	11/18723	0.00153523	0.0152301	0.0111756	PLEK/CXCL13	2	BP
GO:0033632	regulation of cell-cell adhesion mediated by integrin	2/101	11/18723	0.00153523	0.0152301	0.0111756	CCL5/CXCL13	2	BP
GO:0045628	regulation of T-helper 2 cell differentiation	2/101	11/18723	0.00153523	0.0152301	0.0111756	ANXA1/TNFSF4	2	BP
GO:0042088	T-helper 1 type immune response	3/101	43/18723	0.00160771	0.0156172	0.0114596	ANXA1/TNFSF4/HAVCR2	3	BP
GO:0046636	negative regulation of alpha-beta T cell activation	3/101	43/18723	0.00160771	0.0156172	0.0114596	ANXA1/CD300A/TNFSF4	3	BP
GO:0001837	epithelial to mesenchymal transition	5/101	157/18723	0.00161341	0.0156172	0.0114596	TGFBR3/HIF1A/RGCC/TIAM1/RBPJ	5	BP
GO:1902107	positive regulation of leukocyte differentiation	5/101	157/18723	0.00161341	0.0156172	0.0114596	ANXA1/TOX/TNFSF4/HLA-DRA/CD27	5	BP
GO:1903708	positive regulation of hemopoiesis	5/101	157/18723	0.00161341	0.0156172	0.0114596	ANXA1/TOX/TNFSF4/HLA-DRA/CD27	5	BP
GO:0002690	positive regulation of leukocyte chemotaxis	4/101	94/18723	0.00167746	0.0161588	0.011857	CCL5/CX3CR1/XCL2/CXCL13	4	BP
GO:0050764	regulation of phagocytosis	4/101	95/18723	0.00174403	0.0167192	0.0122682	FGR/LYAR/CD300A/SIRPG	4	BP
GO:1904646	cellular response to amyloid-beta	3/101	45/18723	0.00183423	0.0174314	0.0127909	ADRB2/NAMPT/VCAM1	3	BP
GO:0043380	regulation of memory T cell differentiation	2/101	12/18723	0.00183581	0.0174314	0.0127909	TNFSF4/HLA-DRA	2	BP
GO:0050851	antigen receptor-mediated signaling pathway	6/101	240/18723	0.00191646	0.0180448	0.0132409	CD160/CD300A/TRAT1/LGALS3/CD28/CTLA4	6	BP
GO:0002700	regulation of production of molecular mediator of immune response	5/101	164/18723	0.00195355	0.0180448	0.0132409	CD160/CD244/TFRC/TNFSF4/CD28	5	BP
GO:0043300	regulation of leukocyte degranulation	3/101	46/18723	0.00195457	0.0180448	0.0132409	FGR/KLRC2/CD300A	3	BP
GO:0055010	ventricular cardiac muscle tissue morphogenesis	3/101	46/18723	0.00195457	0.0180448	0.0132409	TGFBR3/FKBP1A/RBPJ	3	BP
GO:2000107	negative regulation of leukocyte apoptotic process	3/101	46/18723	0.00195457	0.0180448	0.0132409	CCL5/HIF1A/CD27	3	BP
GO:0032642	regulation of chemokine production	4/101	98/18723	0.0019547	0.0180448	0.0132409	MBP/HIF1A/TNFSF4/HAVCR2	4	BP
GO:1903320	regulation of protein modification by small protein conjugation or removal	6/101	242/18723	0.00199809	0.0183604	0.0134725	HIF1A/PELI1/FKBP1A/TANK/BIRC3/NDFIP2	6	BP
GO:0002444	myeloid leukocyte mediated immunity	4/101	99/18723	0.00202867	0.0183871	0.0134921	CX3CR1/FGR/PTGDR/CD300A	4	BP
GO:0032602	chemokine production	4/101	99/18723	0.00202867	0.0183871	0.0134921	MBP/HIF1A/TNFSF4/HAVCR2	4	BP
GO:0042100	B cell proliferation	4/101	99/18723	0.00202867	0.0183871	0.0134921	CD300A/TFRC/PELI1/CTLA4	4	BP
GO:0001774	microglial cell activation	3/101	47/18723	0.00207972	0.0185962	0.0136456	CX3CR1/CST7/NAMPT	3	BP
GO:0045581	negative regulation of T cell differentiation	3/101	47/18723	0.00207972	0.0185962	0.0136456	ANXA1/TNFSF4/CTLA4	3	BP
GO:0045911	positive regulation of DNA recombination	3/101	47/18723	0.00207972	0.0185962	0.0136456	TFRC/TNFSF4/CD28	3	BP
GO:0034112	positive regulation of homotypic cell-cell adhesion	2/101	13/18723	0.00216198	0.0188129	0.0138045	CCL5/IL6ST	2	BP
GO:0043379	memory T cell differentiation	2/101	13/18723	0.00216198	0.0188129	0.0138045	TNFSF4/HLA-DRA	2	BP
GO:0060347	heart trabecula formation	2/101	13/18723	0.00216198	0.0188129	0.0138045	TGFBR3/FKBP1A	2	BP
GO:0061418	regulation of transcription from RNA polymerase II promoter in response to hypoxia	2/101	13/18723	0.00216198	0.0188129	0.0138045	HIF1A/RBPJ	2	BP
GO:0070234	positive regulation of T cell apoptotic process	2/101	13/18723	0.00216198	0.0188129	0.0138045	CCL5/PDCD1	2	BP
GO:1903977	positive regulation of glial cell migration	2/101	13/18723	0.00216198	0.0188129	0.0138045	CX3CR1/TIAM1	2	BP
GO:0002833	positive regulation of response to biotic stimulus	5/101	168/18723	0.00216999	0.0188129	0.0138045	KLRD1/CCL5/CD160/KLRC2/HAVCR2	5	BP
GO:0043303	mast cell degranulation	3/101	48/18723	0.00220974	0.0190746	0.0139966	FGR/PTGDR/CD300A	3	BP
GO:0030593	neutrophil chemotaxis	4/101	103/18723	0.00234394	0.0199801	0.014661	CCL5/XCL2/LGALS3/CXCL13	4	BP
GO:0001913	T cell mediated cytotoxicity	3/101	49/18723	0.00234471	0.0199801	0.014661	KLRD1/PRF1/HLA-DRA	3	BP
GO:0002279	mast cell activation involved in immune response	3/101	49/18723	0.00234471	0.0199801	0.014661	FGR/PTGDR/CD300A	3	BP
GO:0002448	mast cell mediated immunity	3/101	50/18723	0.00248468	0.0206257	0.0151347	FGR/PTGDR/CD300A	3	BP
GO:0002639	positive regulation of immunoglobulin production	3/101	50/18723	0.00248468	0.0206257	0.0151347	TFRC/TNFSF4/CD28	3	BP
GO:0045058	T cell selection	3/101	50/18723	0.00248468	0.0206257	0.0151347	TOX/BATF/CD28	3	BP
GO:0046638	positive regulation of alpha-beta T cell differentiation	3/101	50/18723	0.00248468	0.0206257	0.0151347	ANXA1/TNFSF4/HLA-DRA	3	BP
GO:0034612	response to tumor necrosis factor	6/101	253/18723	0.00249511	0.0206257	0.0151347	CCL5/XCL2/TANK/BIRC3/VCAM1/TNFRSF18	6	BP
GO:0003376	sphingosine-1-phosphate receptor signaling pathway	2/101	14/18723	0.00251345	0.0206257	0.0151347	S1PR5/S1PR1	2	BP
GO:0060576	intestinal epithelial cell development	2/101	14/18723	0.00251345	0.0206257	0.0151347	HIF1A/IL6ST	2	BP
GO:0090715	immunological memory formation process	2/101	14/18723	0.00251345	0.0206257	0.0151347	TNFSF4/HLA-DRA	2	BP
GO:0032231	regulation of actin filament bundle assembly	4/101	105/18723	0.00251356	0.0206257	0.0151347	PLEK/S1PR1/GPR65/RGCC	4	BP
GO:0035821	modulation of process of other organism	4/101	106/18723	0.00260145	0.0211726	0.0155361	CCL5/CX3CR1/STOM/PRF1	4	BP
GO:0042116	macrophage activation	4/101	106/18723	0.00260145	0.0211726	0.0155361	CX3CR1/CST7/NAMPT/HAVCR2	4	BP
GO:0043370	regulation of CD4-positive, alpha-beta T cell differentiation	3/101	51/18723	0.00262972	0.0213157	0.015641	ANXA1/TNFSF4/HLA-DRA	3	BP
GO:0002824	positive regulation of adaptive immune response based on somatic recombination of immune receptors built from immunoglobulin superfamily domains	4/101	107/18723	0.00269143	0.0217276	0.0159433	TFRC/TNFSF4/CD28/HLA-DRA	4	BP
GO:0002832	negative regulation of response to biotic stimulus	4/101	108/18723	0.00278353	0.0223805	0.0164224	KLRD1/A2M/LYAR/HAVCR2	4	BP
GO:0042976	activation of Janus kinase activity	2/101	15/18723	0.00288996	0.0230503	0.0169139	CCL5/CD300A	2	BP
GO:0071380	cellular response to prostaglandin E stimulus	2/101	15/18723	0.00288996	0.0230503	0.0169139	PTGER2/TNFSF4	2	BP
GO:0008347	glial cell migration	3/101	53/18723	0.00293524	0.0231338	0.0169752	CX3CR1/ADGRG1/TIAM1	3	BP
GO:0033059	cellular pigmentation	3/101	53/18723	0.00293524	0.0231338	0.0169752	ZEB2/MYO7A/LYST	3	BP
GO:0045744	negative regulation of G protein-coupled receptor signaling pathway	3/101	53/18723	0.00293524	0.0231338	0.0169752	CCL5/PLEK/ADRB2	3	BP
GO:0002823	negative regulation of adaptive immune response based on somatic recombination of immune receptors built from immunoglobulin superfamily domains	3/101	54/18723	0.00309583	0.0242082	0.0177635	KLRD1/TNFSF4/HAVCR2	3	BP
GO:0043647	inositol phosphate metabolic process	3/101	54/18723	0.00309583	0.0242082	0.0177635	PLEK/CD244/INPP4B	3	BP
GO:0032609	interferon-gamma production	4/101	112/18723	0.00317353	0.0245795	0.0180359	CD160/CD244/TNFSF4/HAVCR2	4	BP
GO:0032649	regulation of interferon-gamma production	4/101	112/18723	0.00317353	0.0245795	0.0180359	CD160/CD244/TNFSF4/HAVCR2	4	BP
GO:0045620	negative regulation of lymphocyte differentiation	3/101	55/18723	0.00326173	0.0245795	0.0180359	ANXA1/TNFSF4/CTLA4	3	BP
GO:1905517	macrophage migration	3/101	55/18723	0.00326173	0.0245795	0.0180359	CCL5/CX3CR1/LGALS3	3	BP
GO:0071347	cellular response to interleukin-1	4/101	113/18723	0.00327656	0.0245795	0.0180359	CCL5/XCL2/HIF1A/TANK	4	BP
GO:0002399	MHC class II protein complex assembly	2/101	16/18723	0.00329123	0.0245795	0.0180359	HLA-DQA1/HLA-DRA	2	BP
GO:0002503	peptide antigen assembly with MHC class II protein complex	2/101	16/18723	0.00329123	0.0245795	0.0180359	HLA-DQA1/HLA-DRA	2	BP
GO:0010919	regulation of inositol phosphate biosynthetic process	2/101	16/18723	0.00329123	0.0245795	0.0180359	PLEK/CD244	2	BP
GO:0033631	cell-cell adhesion mediated by integrin	2/101	16/18723	0.00329123	0.0245795	0.0180359	CCL5/CXCL13	2	BP
GO:0034138	toll-like receptor 3 signaling pathway	2/101	16/18723	0.00329123	0.0245795	0.0180359	PELI1/HAVCR2	2	BP
GO:0070230	positive regulation of lymphocyte apoptotic process	2/101	16/18723	0.00329123	0.0245795	0.0180359	CCL5/PDCD1	2	BP
GO:0090520	sphingolipid mediated signaling pathway	2/101	16/18723	0.00329123	0.0245795	0.0180359	S1PR5/S1PR1	2	BP
GO:0002886	regulation of myeloid leukocyte mediated immunity	3/101	56/18723	0.00343299	0.0254475	0.0186729	CX3CR1/FGR/CD300A	3	BP
GO:1904645	response to amyloid-beta	3/101	56/18723	0.00343299	0.0254475	0.0186729	ADRB2/NAMPT/VCAM1	3	BP
GO:0030278	regulation of ossification	4/101	115/18723	0.00348941	0.0256749	0.0188397	S1PR1/ADRB2/HIF1A/RBPJ	4	BP
GO:0090630	activation of GTPase activity	4/101	115/18723	0.00348941	0.0256749	0.0188397	GPR65/TIAM1/TBC1D4/CXCL13	4	BP
GO:0048872	homeostasis of number of cells	6/101	272/18723	0.00356577	0.0261403	0.0191812	CX3CR1/TGFBR3/LYAR/ANXA1/ADGRG1/HIF1A	6	BP
GO:0033623	regulation of integrin activation	2/101	17/18723	0.00371699	0.027149	0.0199214	PLEK/CXCL13	2	BP
GO:0043666	regulation of phosphoprotein phosphatase activity	3/101	58/18723	0.00379178	0.0275942	0.0202481	CD300A/FKBP1A/LGALS3	3	BP
GO:0030282	bone mineralization	4/101	119/18723	0.00394297	0.0284865	0.0209028	FGR/S1PR1/ADRB2/HIF1A	4	BP
GO:0031398	positive regulation of protein ubiquitination	4/101	119/18723	0.00394297	0.0284865	0.0209028	PELI1/FKBP1A/BIRC3/NDFIP2	4	BP
GO:0002223	stimulatory C-type lectin receptor signaling pathway	2/101	18/18723	0.00416696	0.0288685	0.0211831	KLRD1/KLRC2	2	BP
GO:0002501	peptide antigen assembly with MHC protein complex	2/101	18/18723	0.00416696	0.0288685	0.0211831	HLA-DQA1/HLA-DRA	2	BP
GO:0030889	negative regulation of B cell proliferation	2/101	18/18723	0.00416696	0.0288685	0.0211831	CD300A/CTLA4	2	BP
GO:0045623	negative regulation of T-helper cell differentiation	2/101	18/18723	0.00416696	0.0288685	0.0211831	ANXA1/TNFSF4	2	BP
GO:0045953	negative regulation of natural killer cell mediated cytotoxicity	2/101	18/18723	0.00416696	0.0288685	0.0211831	KLRD1/HAVCR2	2	BP
GO:0060546	negative regulation of necroptotic process	2/101	18/18723	0.00416696	0.0288685	0.0211831	PELI1/BIRC3	2	BP
GO:1990840	response to lectin	2/101	18/18723	0.00416696	0.0288685	0.0211831	KLRD1/KLRC2	2	BP
GO:1990858	cellular response to lectin	2/101	18/18723	0.00416696	0.0288685	0.0211831	KLRD1/KLRC2	2	BP
GO:0002712	regulation of B cell mediated immunity	3/101	60/18723	0.00417263	0.0288685	0.0211831	TFRC/TNFSF4/CD28	3	BP
GO:0002889	regulation of immunoglobulin mediated immune response	3/101	60/18723	0.00417263	0.0288685	0.0211831	TFRC/TNFSF4/CD28	3	BP
GO:0051851	modulation by host of symbiont process	3/101	60/18723	0.00417263	0.0288685	0.0211831	CCL5/CX3CR1/STOM	3	BP
GO:0002224	toll-like receptor signaling pathway	4/101	121/18723	0.00418404	0.0288685	0.0211831	CD300A/PELI1/BIRC3/HAVCR2	4	BP
GO:0003206	cardiac chamber morphogenesis	4/101	121/18723	0.00418404	0.0288685	0.0211831	TGFBR3/HIF1A/FKBP1A/RBPJ	4	BP
GO:0043393	regulation of protein binding	5/101	196/18723	0.00420421	0.0289076	0.0212118	HOPX/TGFBR3/ADRB2/FKBP1A/TIAM1	5	BP
GO:0002688	regulation of leukocyte chemotaxis	4/101	122/18723	0.00430824	0.0294199	0.0215878	CCL5/CX3CR1/XCL2/CXCL13	4	BP
GO:1990266	neutrophil migration	4/101	122/18723	0.00430824	0.0294199	0.0215878	CCL5/XCL2/LGALS3/CXCL13	4	BP
GO:2000401	regulation of lymphocyte migration	3/101	61/18723	0.00437145	0.0297497	0.0218298	CCL5/XCL2/CXCL13	3	BP
GO:0003231	cardiac ventricle development	4/101	123/18723	0.0044349	0.0300789	0.0220713	TGFBR3/HIF1A/FKBP1A/RBPJ	4	BP
GO:0010573	vascular endothelial growth factor production	3/101	62/18723	0.00457593	0.0303407	0.0222634	ADGRG1/HIF1A/IL6ST	3	BP
GO:0032623	interleukin-2 production	3/101	62/18723	0.00457593	0.0303407	0.0222634	ANXA1/CD28/HAVCR2	3	BP
GO:0032663	regulation of interleukin-2 production	3/101	62/18723	0.00457593	0.0303407	0.0222634	ANXA1/CD28/HAVCR2	3	BP
GO:0045576	mast cell activation	3/101	62/18723	0.00457593	0.0303407	0.0222634	FGR/PTGDR/CD300A	3	BP
GO:0002281	macrophage activation involved in immune response	2/101	19/18723	0.00464087	0.0303407	0.0222634	CX3CR1/HAVCR2	2	BP
GO:0002396	MHC protein complex assembly	2/101	19/18723	0.00464087	0.0303407	0.0222634	HLA-DQA1/HLA-DRA	2	BP
GO:0002716	negative regulation of natural killer cell mediated immunity	2/101	19/18723	0.00464087	0.0303407	0.0222634	KLRD1/HAVCR2	2	BP
GO:0030050	vesicle transport along actin filament	2/101	19/18723	0.00464087	0.0303407	0.0222634	MYO1F/MYO7A	2	BP
GO:0048245	eosinophil chemotaxis	2/101	19/18723	0.00464087	0.0303407	0.0222634	CCL5/LGALS3	2	BP
GO:0062099	negative regulation of programmed necrotic cell death	2/101	19/18723	0.00464087	0.0303407	0.0222634	PELI1/BIRC3	2	BP
GO:1903975	regulation of glial cell migration	2/101	19/18723	0.00464087	0.0303407	0.0222634	CX3CR1/TIAM1	2	BP
GO:0051054	positive regulation of DNA metabolic process	5/101	201/18723	0.00467525	0.0304655	0.022355	TFRC/TOX/TNFSF4/RGCC/CD28	5	BP
GO:0019722	calcium-mediated signaling	5/101	202/18723	0.00477379	0.0309854	0.0227365	PLEK/CX3CR1/TRAT1/VCAM1/CXCR6	5	BP
GO:0032233	positive regulation of actin filament bundle assembly	3/101	63/18723	0.00478611	0.0309854	0.0227365	PLEK/GPR65/RGCC	3	BP
GO:0048247	lymphocyte chemotaxis	3/101	64/18723	0.00500205	0.0322205	0.0236428	CCL5/XCL2/CXCL13	3	BP
GO:0032612	interleukin-1 production	4/101	128/18723	0.00510599	0.0322205	0.0236428	CX3CR1/ANXA1/ACP5/HAVCR2	4	BP
GO:0032652	regulation of interleukin-1 production	4/101	128/18723	0.00510599	0.0322205	0.0236428	CX3CR1/ANXA1/ACP5/HAVCR2	4	BP
GO:0035303	regulation of dephosphorylation	4/101	128/18723	0.00510599	0.0322205	0.0236428	PLEK/CD300A/FKBP1A/LGALS3	4	BP
GO:0002834	regulation of response to tumor cell	2/101	20/18723	0.00513847	0.0322205	0.0236428	CD160/HAVCR2	2	BP
GO:0002837	regulation of immune response to tumor cell	2/101	20/18723	0.00513847	0.0322205	0.0236428	CD160/HAVCR2	2	BP
GO:0043011	myeloid dendritic cell differentiation	2/101	20/18723	0.00513847	0.0322205	0.0236428	BATF/RBPJ	2	BP
GO:0045063	T-helper 1 cell differentiation	2/101	20/18723	0.00513847	0.0322205	0.0236428	ANXA1/TNFSF4	2	BP
GO:0071379	cellular response to prostaglandin stimulus	2/101	20/18723	0.00513847	0.0322205	0.0236428	PTGER2/TNFSF4	2	BP
GO:0097320	plasma membrane tubulation	2/101	20/18723	0.00513847	0.0322205	0.0236428	BIN2/SNX9	2	BP
GO:0048524	positive regulation of viral process	3/101	65/18723	0.00522378	0.0326527	0.0239599	CCL5/STOM/CD28	3	BP
GO:0050918	positive chemotaxis	3/101	66/18723	0.00545135	0.0339687	0.0249256	CCL5/S1PR1/LGALS3	3	BP
GO:0071222	cellular response to lipopolysaccharide	5/101	209/18723	0.00550534	0.0341983	0.025094	CCL5/CX3CR1/TNFSF4/CXCL13/HAVCR2	5	BP
GO:0019079	viral genome replication	4/101	131/18723	0.00553966	0.0343046	0.025172	CCL5/STOM/CD28/CXCR6	4	BP
GO:0033630	positive regulation of cell adhesion mediated by integrin	2/101	21/18723	0.00565949	0.0344056	0.0252461	CCL5/CXCL13	2	BP
GO:0043373	CD4-positive, alpha-beta T cell lineage commitment	2/101	21/18723	0.00565949	0.0344056	0.0252461	TOX/BATF	2	BP
GO:0046641	positive regulation of alpha-beta T cell proliferation	2/101	21/18723	0.00565949	0.0344056	0.0252461	TNFSF4/CD28	2	BP
GO:0090026	positive regulation of monocyte chemotaxis	2/101	21/18723	0.00565949	0.0344056	0.0252461	CCL5/CX3CR1	2	BP
GO:0099515	actin filament-based transport	2/101	21/18723	0.00565949	0.0344056	0.0252461	MYO1F/MYO7A	2	BP
GO:2000047	regulation of cell-cell adhesion mediated by cadherin	2/101	21/18723	0.00565949	0.0344056	0.0252461	RGCC/ADAM19	2	BP
GO:0042130	negative regulation of T cell proliferation	3/101	67/18723	0.0056848	0.0344544	0.025282	PELI1/CTLA4/HAVCR2	3	BP
GO:0009988	cell-cell recognition	3/101	68/18723	0.00592417	0.0355807	0.0261084	PRF1/LGALS3/HAVCR2	3	BP
GO:0042531	positive regulation of tyrosine phosphorylation of STAT protein	3/101	68/18723	0.00592417	0.0355807	0.0261084	CCL5/IL6ST/TNFRSF18	3	BP
GO:0046637	regulation of alpha-beta T cell differentiation	3/101	68/18723	0.00592417	0.0355807	0.0261084	ANXA1/TNFSF4/HLA-DRA	3	BP
GO:0008277	regulation of G protein-coupled receptor signaling pathway	4/101	134/18723	0.00599731	0.0358043	0.0262725	CCL5/PLEK/ADRB2/RGS1	4	BP
GO:0032147	activation of protein kinase activity	4/101	134/18723	0.00599731	0.0358043	0.0262725	CCL5/ADRB2/CD300A/RGCC	4	BP
GO:0002220	innate immune response activating cell surface receptor signaling pathway	2/101	22/18723	0.00620366	0.0361699	0.0265407	KLRD1/KLRC2	2	BP
GO:0032816	positive regulation of natural killer cell activation	2/101	22/18723	0.00620366	0.0361699	0.0265407	KLRC2/TOX	2	BP
GO:0043371	negative regulation of CD4-positive, alpha-beta T cell differentiation	2/101	22/18723	0.00620366	0.0361699	0.0265407	ANXA1/TNFSF4	2	BP
GO:0045061	thymic T cell selection	2/101	22/18723	0.00620366	0.0361699	0.0265407	TOX/CD28	2	BP
GO:0045624	positive regulation of T-helper cell differentiation	2/101	22/18723	0.00620366	0.0361699	0.0265407	ANXA1/TNFSF4	2	BP
GO:0050860	negative regulation of T cell receptor signaling pathway	2/101	22/18723	0.00620366	0.0361699	0.0265407	CD160/LGALS3	2	BP
GO:0060343	trabecula formation	2/101	22/18723	0.00620366	0.0361699	0.0265407	TGFBR3/FKBP1A	2	BP
GO:1901522	positive regulation of transcription from RNA polymerase II promoter involved in cellular response to chemical stimulus	2/101	22/18723	0.00620366	0.0361699	0.0265407	HIF1A/RBPJ	2	BP
GO:0002052	positive regulation of neuroblast proliferation	2/101	23/18723	0.00677073	0.0386843	0.0283858	CX3CR1/HIF1A	2	BP
GO:0002363	alpha-beta T cell lineage commitment	2/101	23/18723	0.00677073	0.0386843	0.0283858	TOX/BATF	2	BP
GO:0002758	innate immune response-activating signal transduction	2/101	23/18723	0.00677073	0.0386843	0.0283858	KLRD1/KLRC2	2	BP
GO:0031338	regulation of vesicle fusion	2/101	23/18723	0.00677073	0.0386843	0.0283858	ANXA1/TBC1D4	2	BP
GO:0043369	CD4-positive or CD8-positive, alpha-beta T cell lineage commitment	2/101	23/18723	0.00677073	0.0386843	0.0283858	TOX/BATF	2	BP
GO:0060547	negative regulation of necrotic cell death	2/101	23/18723	0.00677073	0.0386843	0.0283858	PELI1/BIRC3	2	BP
GO:0060575	intestinal epithelial cell differentiation	2/101	23/18723	0.00677073	0.0386843	0.0283858	HIF1A/IL6ST	2	BP
GO:0071219	cellular response to molecule of bacterial origin	5/101	221/18723	0.0069385	0.0395296	0.029006	CCL5/CX3CR1/TNFSF4/CXCL13/HAVCR2	5	BP
GO:0030183	B cell differentiation	4/101	141/18723	0.00716153	0.040684	0.0298531	ITM2A/VCAM1/RBPJ/CD27	4	BP
GO:0002637	regulation of immunoglobulin production	3/101	73/18723	0.00721112	0.0408493	0.0299744	TFRC/TNFSF4/CD28	3	BP
GO:0036003	positive regulation of transcription from RNA polymerase II promoter in response to stress	2/101	24/18723	0.00736043	0.0413428	0.0303365	HIF1A/RBPJ	2	BP
GO:0043302	positive regulation of leukocyte degranulation	2/101	24/18723	0.00736043	0.0413428	0.0303365	FGR/KLRC2	2	BP
GO:2000353	positive regulation of endothelial cell apoptotic process	2/101	24/18723	0.00736043	0.0413428	0.0303365	CD160/RGCC	2	BP
GO:0002437	inflammatory response to antigenic stimulus	3/101	74/18723	0.00748678	0.0418169	0.0306844	FGR/CD28/RBPJ	3	BP
GO:0003151	outflow tract morphogenesis	3/101	74/18723	0.00748678	0.0418169	0.0306844	TGFBR3/HIF1A/RBPJ	3	BP
GO:0014065	phosphatidylinositol 3-kinase signaling	4/101	144/18723	0.00770309	0.0429049	0.0314828	CCL5/CD160/FGR/CD28	4	BP
GO:0034121	regulation of toll-like receptor signaling pathway	3/101	75/18723	0.00776861	0.0431493	0.0316621	CD300A/PELI1/BIRC3	3	BP
GO:0061351	neural precursor cell proliferation	4/101	145/18723	0.00788943	0.0436987	0.0320652	CX3CR1/ADGRG1/TOX/HIF1A	4	BP
GO:0033622	integrin activation	2/101	25/18723	0.00797251	0.0439149	0.0322239	PLEK/CXCL13	2	BP
GO:0042832	defense response to protozoan	2/101	25/18723	0.00797251	0.0439149	0.0322239	BATF/LYST	2	BP
GO:0045055	regulated exocytosis	5/101	230/18723	0.00817187	0.044889	0.0329387	PLEK/FGR/KLRC2/PTGDR/CD300A	5	BP
GO:0032418	lysosome localization	3/101	77/18723	0.00835089	0.0457464	0.0335678	FGR/PTGDR/CD300A	3	BP
GO:0010212	response to ionizing radiation	4/101	148/18723	0.0084662	0.046251	0.033938	ANXA1/NAMPT/TANK/VCAM1	4	BP
GO:0001562	response to protozoan	2/101	26/18723	0.00860672	0.0463833	0.0340351	BATF/LYST	2	BP
GO:0032515	negative regulation of phosphoprotein phosphatase activity	2/101	26/18723	0.00860672	0.0463833	0.0340351	FKBP1A/LGALS3	2	BP
GO:0046639	negative regulation of alpha-beta T cell differentiation	2/101	26/18723	0.00860672	0.0463833	0.0340351	ANXA1/TNFSF4	2	BP
GO:0060544	regulation of necroptotic process	2/101	26/18723	0.00860672	0.0463833	0.0340351	PELI1/BIRC3	2	BP
GO:1905523	positive regulation of macrophage migration	2/101	26/18723	0.00860672	0.0463833	0.0340351	CCL5/CX3CR1	2	BP
GO:0030500	regulation of bone mineralization	3/101	78/18723	0.00865141	0.0464984	0.0341196	S1PR1/ADRB2/HIF1A	3	BP
GO:0014068	positive regulation of phosphatidylinositol 3-kinase signaling	3/101	79/18723	0.00895822	0.048018	0.0352346	CCL5/FGR/CD28	3	BP
GO:0048738	cardiac muscle tissue development	5/101	236/18723	0.00907411	0.0483791	0.0354996	HOPX/TGFBR3/S1PR1/FKBP1A/RBPJ	5	BP
GO:0048762	mesenchymal cell differentiation	5/101	236/18723	0.00907411	0.0483791	0.0354996	TGFBR3/HIF1A/RGCC/TIAM1/RBPJ	5	BP
GO:0031334	positive regulation of protein-containing complex assembly	5/101	237/18723	0.0092309	0.0490838	0.0360167	PLEK/SNX9/TFRC/LGALS3/CXCL13	5	BP
GO:0001772	immunological synapse	5/103	44/19550	3.39547e-06	0.000482157	0.000396734	GZMA/LGALS3/CD28/HLA-DRA/HAVCR2	5	CC
GO:0045334	clathrin-coated endocytic vesicle	5/103	91/19550	0.000119542	0.00848747	0.00698376	ADRB2/TFRC/HLA-DQA1/HLA-DRA/CTLA4	5	CC
GO:0030669	clathrin-coated endocytic vesicle membrane	4/103	72/19550	0.000567875	0.0213224	0.0175448	ADRB2/TFRC/HLA-DQA1/HLA-DRA	4	CC
GO:0030136	clathrin-coated vesicle	6/103	196/19550	0.000600631	0.0213224	0.0175448	ADRB2/SNX9/TFRC/HLA-DQA1/HLA-DRA/CTLA4	6	CC
GO:0023023	MHC protein complex binding	6/102	36/18368	4.30133e-08	9.54896e-06	7.78768e-06	CD8A/KLRD1/CD160/KLRC2/HLA-DQA1/HLA-DRA	6	MF
GO:0140375	immune receptor activity	8/102	144/18368	1.38333e-06	0.00015355	0.000125228	KLRD1/CD160/CX3CR1/KLRC2/HLA-DQA1/IL6ST/HLA-DRA/CXCR6	8	MF
GO:0015026	coreceptor activity	5/102	48/18368	6.77713e-06	0.000501507	0.000409005	CD8A/TGFBR3/GPR15/CD28/CXCR6	5	MF
GO:0019955	cytokine binding	7/102	139/18368	1.23948e-05	0.000687912	0.000561028	CX3CR1/A2M/TGFBR3/PLP2/IL6ST/CXCR6/TNFRSF9	7	MF
GO:0005126	cytokine receptor binding	9/102	271/18368	2.00777e-05	0.00089145	0.000727025	CCL5/CX3CR1/TGFBR3/XCL2/TNFSF10/FKBP1A/TNFSF4/IL6ST/CXCL13	9	MF
GO:0019956	chemokine binding	4/102	33/18368	3.24045e-05	0.00119897	0.000977819	CX3CR1/A2M/PLP2/CXCR6	4	MF
GO:0042287	MHC protein binding	4/102	40/18368	7.02455e-05	0.00222779	0.00181688	CD8A/KLRD1/FCRL6/CD244	4	MF
GO:0019865	immunoglobulin binding	3/102	23/18368	0.00027159	0.00753662	0.00614651	FCGR3A/FCGR3B/LGALS3	3	MF
GO:0042379	chemokine receptor binding	4/102	72/18368	0.000690262	0.0170265	0.013886	CCL5/CX3CR1/XCL2/CXCL13	4	MF
GO:0030246	carbohydrate binding	7/102	271/18368	0.000789146	0.017519	0.0142877	KLRD1/KLRG1/KLRC3/KLRC2/GALM/LGALS3/HLA-DRA	7	MF
GO:0019838	growth factor binding	5/102	141/18368	0.00113877	0.0227944	0.01859	FGFBP2/A2M/TGFBR3/IL6ST/CXCL13	5	MF
GO:0004955	prostaglandin receptor activity	2/102	10/18368	0.00133481	0.0227944	0.01859	PTGER2/PTGDR	2	MF
GO:0032395	MHC class II receptor activity	2/102	10/18368	0.00133481	0.0227944	0.01859	HLA-DQA1/HLA-DRA	2	MF
GO:0004954	prostanoid receptor activity	2/102	11/18368	0.00162553	0.0240578	0.0196204	PTGER2/PTGDR	2	MF
GO:0019864	IgG binding	2/102	11/18368	0.00162553	0.0240578	0.0196204	FCGR3A/FCGR3B	2	MF
GO:0005125	cytokine activity	6/102	235/18368	0.00199409	0.027668	0.0225647	CCL5/XCL2/TNFSF10/NAMPT/TNFSF4/CXCL13	6	MF
GO:0048020	CCR chemokine receptor binding	3/102	48/18368	0.00239874	0.0313247	0.0255469	CCL5/XCL2/CXCL13	3	MF
GO:0008009	chemokine activity	3/102	49/18368	0.00254495	0.0313878	0.0255984	CCL5/XCL2/CXCL13	3	MF
GO:0004953	icosanoid receptor activity	2/102	15/18368	0.00305866	0.0323344	0.0263704	PTGER2/PTGDR	2	MF
GO:0045125	bioactive lipid receptor activity	2/102	15/18368	0.00305866	0.0323344	0.0263704	S1PR5/S1PR1	2	MF
GO:0048185	activin binding	2/102	15/18368	0.00305866	0.0323344	0.0263704	TGFBR3/FKBP1A	2	MF
GO:0004869	cysteine-type endopeptidase inhibitor activity	3/102	56/18368	0.00372319	0.0375704	0.0306406	CST7/BIRC3/CD27	3	MF
