# Supplementary material for: A model-based factorization method for scRNA data unveils bifurcating transcriptional modules underlying cell fate determination
Source: eLife. 2025 Feb 5;13:RP97424. doi: 10.7554/eLife.97424 (PMC11798574; doi:10.7554/eLife.97424)
Supplement: Supplementary file 11. — CD8-ZNF683-T1 cells (n=204) vs. CD8-ZNF683-T2 cells (n=395), two-sided moderated t-test with limma. [file elife-97424-supp11.xlsx]

## Sheet: supplementary_table11
Supplementary file 11: List of genes specifically expressed in CD8-ZNF683. CD8-ZNF683-T1 cells (n = 204) vs. CD8-ZNF683-T2 cells (n = 395), two-sided moderated t-test with limma
Gene	logFC	AveExpr	t	P.Value	adj.P.Val	B
RGS1	1.1021	0.975184	3.05525	0.00234826	0.012793	-2.11123
ATP2B1	1.00382	-0.110688	3.34615	0.000870428	0.00590031	-1.20868
PHLDA1	0.686307	0.510726	2.85826	0.00440712	0.0217099	-2.67722
CTLA4	0.680996	-0.648741	3.72157	0.000216545	0.00183135	0.0724738
HNRNPLL	0.676643	-0.449823	2.63259	0.00869111	0.0374646	-3.28049
TOX	0.60099	0.207471	2.28226	0.0228218	0.0750585	-4.12083
SLA	0.563041	0.774306	2.12807	0.0337365	0.0979946	-4.45338
U2AF1L4	0.531913	-0.0966288	2.17649	0.0299063	0.0922111	-4.35142
TNFRSF18	0.311449	-0.798021	2.18009	0.0296372	0.0921826	-4.34375
LAYN	0.301937	-0.257176	2.94107	0.00339649	0.0173338	-2.44374
LOC606724	-0.320648	0.448976	-2.21971	0.0268101	0.0850262	-4.25849
EEF1A1	-0.32246	-0.426173	-3.34754	0.000866155	0.00590031	-1.20418
RPL10	-0.350068	-0.211722	-2.99628	0.00284542	0.014984	-2.28448
RPL6	-0.368914	-0.363476	-2.56405	0.0105873	0.0433249	-3.45411
RPL13	-0.384009	-0.396957	-3.70058	0.000234823	0.00194882	-0.00257005
CSF1	-0.397245	0.235493	-2.14689	0.0322012	0.0963769	-4.41404
ANAPC1P1	-0.40495	2.58512	-2.27542	0.0232316	0.0752963	-4.13608
RPL15	-0.410005	-0.345501	-2.45306	0.0144471	0.0550601	-3.72579
RPS27	-0.417454	-0.390794	-2.16878	0.0304903	0.0933634	-4.36782
PLEK	-0.43096	-1.33937	-2.97879	0.00301046	0.0156333	-2.33525
LINC02067	-0.445303	-0.275319	-4.05276	5.72545e-05	0.000591186	1.31038
PFN1	-0.456638	0.36174	-5.69107	1.973e-08	5.30915e-07	8.87021
S1PR1	-0.462888	-2.3882	-2.35073	0.0190585	0.0666157	-3.96584
RPS6	-0.4669	-0.487751	-3.50346	0.000493337	0.0037443	-0.687747
RAD9A	-0.469366	0.470775	-2.13541	0.0331304	0.0967757	-4.43808
SEM1	-0.471557	0.392013	-2.24548	0.0250993	0.0801732	-4.20223
RPL8	-0.472223	-0.227425	-3.1399	0.00177284	0.0103169	-1.85676
CD96	-0.476127	2.18976	-2.13826	0.0328978	0.0967757	-4.43213
RPS7	-0.48825	-0.234803	-3.13418	0.00180723	0.0103169	-1.87418
CMC1	-0.496486	-0.125994	-2.27006	0.0235564	0.0757903	-4.14797
CDC42SE1	-0.507101	-0.90414	-2.15195	0.0317984	0.0963769	-4.40339
SH3BGRL3	-0.508513	0.877086	-5.04833	5.91356e-07	1.05025e-05	5.62529
RPSAP58	-0.509588	-0.347715	-2.92839	0.00353611	0.0178413	-2.47992
TGFBR3	-0.520112	-0.452787	-2.2743	0.023299	0.0752963	-4.13856
APOBEC3F	-0.52803	1.03515	-2.41128	0.0161951	0.0591878	-3.82501
TPT1	-0.529332	-0.0127499	-3.05193	0.00237395	0.0128541	-2.12106
CD8A	-0.537902	6.32411	-4.52503	7.27812e-06	9.79238e-05	3.24746
ID2	-0.540121	2.66101	-2.17939	0.0296895	0.0921826	-4.34524
TMEM256-PLSCR3	-0.542186	-0.620781	-2.53724	0.0114243	0.0463231	-3.52083
HSPA1B	-0.546664	0.444759	-2.5257	0.0118023	0.0469976	-3.54933
KIAA1671	-0.548079	0.762414	-2.31816	0.0207748	0.0701445	-4.04012
EEF1D	-0.551205	0.0024238	-2.36383	0.0184036	0.0645943	-3.93565
CEP78	-0.554104	-0.301327	-3.13801	0.00178414	0.0103169	-1.86252
DRAP1	-0.564728	1.1168	-2.16451	0.0308173	0.0940405	-4.37686
OXNAD1	-0.56949	1.50652	-2.14638	0.0322419	0.0963769	-4.41511
FBXO10	-0.569814	0.216666	-2.2757	0.0232146	0.0752963	-4.13545
GAS5-AS1	-0.574319	-0.0639705	-4.06843	5.36344e-05	0.000560322	1.37142
GFI1	-0.575425	0.468513	-2.61734	0.00908466	0.0387845	-3.31952
FBXO32	-0.575673	-0.264075	-2.39071	0.017122	0.0620585	-3.87324
C1orf56	-0.583108	-0.647754	-2.93276	0.00348734	0.0176957	-2.46745
CCL4L1	-0.583817	1.96892	-2.51941	0.012013	0.0476228	-3.56481
CLIC3	-0.585274	1.29377	-2.14896	0.032036	0.0963769	-4.40969
ANAPC11	-0.586148	0.471185	-2.44412	0.0148066	0.0558558	-3.74717
XCL2	-0.588736	1.97154	-2.37512	0.0178557	0.0634234	-3.90954
POMP	-0.597969	0.5912	-2.26308	0.023986	0.0768938	-4.16344
RPL19	-0.599595	-0.345523	-4.23898	2.59808e-05	0.000296523	2.05023
RAC2	-0.601227	0.62415	-3.79535	0.00016235	0.00147109	0.339586
NACA	-0.603842	-0.0713632	-2.5324	0.0115816	0.0467475	-3.5328
HDLBP	-0.606642	0.498268	-2.13666	0.033028	0.0967757	-4.43546
RPS3	-0.608016	-0.337661	-5.05302	5.77572e-07	1.05025e-05	5.64771
FIBP	-0.617815	0.451922	-2.36916	0.0181429	0.0641869	-3.92333
HAPLN3	-0.624494	-0.366767	-2.64298	0.00843183	0.0365242	-3.25377
EFHD2	-0.627088	-0.255187	-2.60744	0.00934831	0.0397191	-3.34471
CD7	-0.629798	1.73427	-3.09665	0.00204823	0.0115849	-1.9876
RBX1	-0.631818	0.21436	-2.66436	0.00792009	0.0345875	-3.19847
EEF1B2	-0.638103	-0.464757	-2.66326	0.00794578	0.0345875	-3.20133
ADGRE5	-0.641709	1.89259	-2.34456	0.0193738	0.0668582	-3.97999
RPL39	-0.642316	-0.326125	-4.63063	4.46931e-06	6.10576e-05	3.70787
OAS1	-0.643488	-0.115125	-2.44318	0.0148446	0.0558558	-3.7494
RPS25	-0.644083	-0.298659	-4.49086	8.50468e-06	0.000112719	3.10059
ACTN4	-0.645079	1.43167	-2.14512	0.0323427	0.0963769	-4.41775
SRRT	-0.645339	0.703495	-2.32245	0.0205411	0.0699267	-4.03039
EIF5A	-0.647997	0.429442	-2.48117	0.013367	0.0516081	-3.65809
R3HDM1	-0.648815	0.0926948	-2.78538	0.00551488	0.0256399	-2.87734
SLC1A5	-0.651731	0.858568	-2.27398	0.0233181	0.0752963	-4.13926
RPL12	-0.653057	-0.249355	-3.75678	0.000188846	0.00162811	0.199322
EPSTI1	-0.654066	0.15998	-2.36715	0.018241	0.064278	-3.92799
ACP5	-0.654364	0.520283	-2.47023	0.0137786	0.0527388	-3.68453
APOBEC3G	-0.656254	2.68065	-2.29788	0.0219103	0.0730293	-4.08586
PTPN22	-0.658301	2.60338	-2.12769	0.0337684	0.0979946	-4.45418
TOMM5	-0.659418	0.185792	-2.57405	0.0102895	0.0426965	-3.42906
ITGAE	-0.6606	3.58603	-2.12442	0.0340422	0.0981477	-4.461
PDE4D	-0.660765	0.949703	-2.34933	0.0191295	0.0666157	-3.96905
SUSD3	-0.662269	0.999555	-2.17663	0.0298959	0.0922111	-4.35112
ITGAL	-0.662698	0.116256	-2.14589	0.0322812	0.0963769	-4.41614
MYO1F	-0.662901	0.48718	-2.12547	0.033954	0.0981477	-4.45881
PGK1	-0.663608	1.83299	-2.85695	0.0044251	0.0217099	-2.68087
RAB1B	-0.665069	0.943286	-2.43855	0.0150342	0.0563305	-3.76043
IRF7	-0.665989	0.604906	-2.32224	0.0205528	0.0699267	-4.03088
DEF6	-0.669538	0.623951	-2.14311	0.0325045	0.0965352	-4.42197
DMAC1	-0.670283	-0.0952563	-3.07289	0.00221582	0.0122214	-2.05875
RNF31	-0.670311	0.252588	-2.1356	0.0331149	0.0967757	-4.43768
RPL22	-0.68164	-0.263258	-3.29276	0.00105022	0.00674838	-1.38028
LARS	-0.681738	0.0946084	-2.40599	0.0164291	0.0597912	-3.83745
RPSA	-0.682128	-0.271752	-3.52102	0.000462408	0.00353982	-0.628164
RPL13A	-0.683239	-0.732728	-4.04884	5.81968e-05	0.000594008	1.29513
PTGER2	-0.687497	-0.0240133	-2.43381	0.0152306	0.0568266	-3.77171
COX8A	-0.688291	0.411103	-3.16889	0.00160782	0.00963918	-1.76808
PRDX2	-0.688382	-0.340575	-2.3157	0.0209098	0.0703328	-4.04569
RPS3A	-0.694138	-0.336014	-4.28514	2.12601e-05	0.000248407	2.23845
RIN3	-0.696042	0.70906	-3.13627	0.00179461	0.0103169	-1.86783
DDX60	-0.70046	0.811071	-2.20227	0.0280249	0.0882486	-4.29622
GBP1	-0.701169	0.617666	-2.18601	0.029199	0.0912982	-4.3311
TNFSF10	-0.701325	0.66153	-2.30489	0.0215121	0.0720858	-4.0701
RPS15	-0.705616	-0.21911	-5.11278	4.27118e-07	8.82048e-06	5.93474
GPANK1	-0.705894	0.0119111	-2.96768	0.00311973	0.0161065	-2.36734
RASSF1	-0.706689	0.390537	-2.41353	0.0160966	0.0591878	-3.81972
PSMD8	-0.707796	0.372833	-2.2257	0.026404	0.0840385	-4.24548
APOBEC3C	-0.709548	1.58672	-2.42519	0.0155935	0.0576959	-3.79216
RPL17	-0.710696	-0.293827	-3.81232	0.000151843	0.00140455	0.401704
KHDRBS1	-0.71129	0.152643	-2.49389	0.0129024	0.0500319	-3.62722
SNRPB	-0.714032	0.489425	-2.33945	0.0196381	0.0673307	-3.99167
GZMK	-0.715196	0.632989	-2.19604	0.0284699	0.0893331	-4.30962
PLAC8	-0.715879	-1.90359	-3.36211	0.000822527	0.00566204	-1.15688
CD63	-0.719509	2.75952	-2.50325	0.0125695	0.0493881	-3.6044
RPL10A	-0.720709	-0.125288	-3.75691	0.000188752	0.00162811	0.199787
LY6E	-0.722157	0.87963	-2.68696	0.00740971	0.0327354	-3.13956
PDIA6	-0.72318	1.02007	-2.21538	0.0271072	0.0856627	-4.26788
HM13	-0.724919	0.402768	-2.31838	0.0207628	0.0701445	-4.03963
RPL38	-0.726407	-0.302495	-4.75344	2.50436e-06	3.76927e-05	4.25575
RPS23	-0.730745	-0.361905	-4.38166	1.38948e-05	0.000171369	2.63825
PTP4A2	-0.734232	0.348642	-2.38147	0.0175535	0.0628528	-3.89478
COX4I1	-0.734291	-0.0742093	-2.94199	0.00338654	0.0173338	-2.44111
RAB27A	-0.734511	1.40479	-2.38732	0.0172791	0.0623733	-3.88114
ST13	-0.735417	0.0238814	-2.62238	0.00895283	0.0384063	-3.30664
WDR1	-0.737156	0.653553	-2.50358	0.0125581	0.0493881	-3.6036
UBE2D2	-0.737548	0.322846	-2.57791	0.0101765	0.042626	-3.41936
GZMH	-0.739583	2.91311	-2.29705	0.0219581	0.0730293	-4.08773
AOAH	-0.740016	2.86076	-2.27471	0.0232745	0.0752963	-4.13766
TMEM123	-0.74021	-0.0835935	-2.15179	0.0318107	0.0963769	-4.40372
IFI44L	-0.742412	0.674274	-2.37997	0.0176245	0.0628538	-3.89827
RPL37A	-0.743088	-0.278717	-4.6414	4.25022e-06	5.93402e-05	3.75537
SYNC	-0.744514	0.00711706	-2.8253	0.00488032	0.0235528	-2.76835
C12orf75	-0.745109	1.58036	-2.28455	0.0226862	0.0748898	-4.11572
NAP1L1	-0.746897	0.0125023	-2.38406	0.0174317	0.0626695	-3.88875
CMTM6	-0.748	0.00818923	-2.28608	0.0225961	0.0748706	-4.1123
DARS	-0.748093	-0.0287068	-2.41124	0.0161967	0.0591878	-3.8251
LYAR	-0.748173	0.160569	-2.77283	0.00572913	0.0264972	-2.91127
COPB1	-0.748694	0.440989	-2.34356	0.019425	0.0668582	-3.98227
RPS11	-0.748915	-0.252634	-5.10114	4.53104e-07	8.94125e-06	5.87855
RPS10-NUDT3	-0.752329	-0.304957	-4.64379	4.20292e-06	5.93402e-05	3.76595
IKZF3	-0.754316	1.24982	-2.80709	0.00516096	0.0245076	-2.81823
EPHA1	-0.755016	1.20427	-2.72693	0.00657901	0.0294576	-3.03418
TCIRG1	-0.759742	0.558203	-2.52986	0.0116649	0.0468707	-3.53908
RPS4X	-0.760625	-0.279609	-4.14064	3.95829e-05	0.000423489	1.65561
IDH2	-0.761685	1.64608	-2.34727	0.0192346	0.0667202	-3.97378
CKLF-CMTM1	-0.768509	1.92137	-3.61171	0.000329561	0.00261295	-0.31592
PLTP	-0.76851	1.57876	-3.07692	0.00218651	0.0121351	-2.04671
S100A10	-0.773696	0.85493	-3.42608	0.000654073	0.00472209	-0.946866
RPL23A	-0.774021	-0.284849	-5.11355	4.25454e-07	8.82048e-06	5.93846
TRNT1	-0.774115	-0.335256	-2.90495	0.00380794	0.0191042	-2.54637
RPL18	-0.774213	-0.466696	-4.40884	1.23084e-05	0.000153942	2.75234
SIT1	-0.775308	0.521846	-2.47712	0.0135183	0.0519664	-3.66791
RPLP0	-0.777129	-0.367886	-3.85719	0.000127062	0.0011877	0.567276
SAMHD1	-0.778898	-1.08961	-2.4951	0.0128588	0.0500319	-3.62427
NDUFB11	-0.779201	0.193112	-3.33123	0.00091756	0.00608055	-1.2569
GNPTAB	-0.779227	0.941572	-2.57959	0.0101277	0.0426228	-3.41514
RPS21	-0.780754	-0.337484	-5.04857	5.9064e-07	1.05025e-05	5.62644
DOK2	-0.786131	0.0373281	-2.5665	0.0105137	0.0432232	-3.448
TOMM7	-0.786862	-0.207846	-3.93398	9.32852e-05	0.000920414	0.854902
ANAPC16	-0.787269	0.215985	-2.74319	0.00626568	0.02868	-2.99086
ARHGAP9	-0.788772	0.762345	-2.58549	0.00995799	0.0421081	-3.40029
SNRK	-0.789447	-0.129915	-2.9956	0.00285169	0.014984	-2.28646
JUN	-0.792332	2.42094	-2.42784	0.0154812	0.0575201	-3.78589
PTPN7	-0.792743	1.64024	-2.54216	0.0112663	0.0458919	-3.50862
ATP6V1C2	-0.793983	0.793564	-2.7414	0.00629947	0.0286849	-2.99564
LINC00861	-0.795299	-1.21893	-2.7855	0.00551285	0.0256399	-2.87701
RPS24	-0.795729	-0.219917	-4.64006	4.27677e-06	5.93402e-05	3.74948
RPS16	-0.797402	-0.218205	-4.92552	1.08845e-06	1.82366e-05	5.04572
RPS14P3	-0.800341	-0.401343	-6.14702	1.43763e-09	5.10646e-08	11.3827
IRF9	-0.801152	0.200961	-2.57409	0.0102884	0.0426965	-3.42897
C7orf25	-0.812015	0.212367	-2.66346	0.0079412	0.0345875	-3.20082
C9orf16	-0.812175	0.0976925	-3.2797	0.00109916	0.0069718	-1.42184
CKLF	-0.812369	1.92117	-3.77837	0.000173554	0.00155673	0.277651
PELO	-0.8157	2.63565	-2.82573	0.00487374	0.0235528	-2.76714
UBA52	-0.817661	-0.192619	-5.05989	5.57961e-07	1.05025e-05	5.68056
MT1A	-0.822253	0.541679	-4.06965	5.33624e-05	0.000560322	1.37617
RPS29	-0.823373	-0.330813	-6.21954	9.33228e-10	3.60307e-08	11.7981
ARF6	-0.826794	1.32605	-2.80242	0.00523526	0.0246334	-2.83098
RPS14	-0.827353	-0.496022	-6.75457	3.38308e-11	2.00278e-09	14.9932
SURF4	-0.8276	1.13201	-2.44565	0.0147446	0.0558558	-3.74352
CSNK2B	-0.829899	0.0685902	-2.71107	0.00689807	0.0306274	-3.07618
ATP6V1G1	-0.830933	-0.0690697	-2.73154	0.00648871	0.0292486	-3.02191
SRGAP3	-0.833428	1.00548	-3.31019	0.000988041	0.00645133	-1.32454
CLSTN3	-0.84093	0.696858	-3.42729	0.000651213	0.00472209	-0.942845
SUMO2	-0.841249	0.282141	-3.37921	0.000773937	0.00545441	-1.10113
CDK2AP2	-0.84338	0.176414	-2.75255	0.00609157	0.0280275	-2.96582
SKIL	-0.846078	1.26045	-2.73972	0.00633135	0.0286849	-3.00012
CYBA	-0.847929	0.75744	-4.02059	6.5426e-05	0.000660208	1.18577
CAPG	-0.847985	3.57277	-2.52616	0.011787	0.0469976	-3.54819
HINT1	-0.851504	0.0913315	-3.2911	0.00105633	0.00674838	-1.38557
CXCR3	-0.852174	2.9383	-2.72579	0.00660142	0.0294576	-3.0372
ITGA1	-0.856031	4.16139	-2.57037	0.0103983	0.0429474	-3.4383
RPS27A	-0.860286	-0.265239	-6.47726	1.94213e-10	9.07691e-09	13.3086
C4orf3	-0.862776	0.432048	-3.07984	0.0021655	0.0120941	-2.03798
LY6G5B	-0.86401	0.04562	-2.81011	0.00511347	0.0245076	-2.80999
ISG15	-0.875901	0.703486	-3.25907	0.00118079	0.00738411	-1.48718
CCL4	-0.880321	3.21561	-2.86875	0.00426543	0.0211603	-2.64799
TPI1	-0.885712	1.12617	-3.0944	0.0020636	0.011598	-1.99437
MT2A	-0.886848	0.577856	-4.1492	3.81706e-05	0.00041336	1.68963
SNORA33	-0.88814	-0.271118	-5.86161	7.55584e-09	2.23653e-07	9.78984
RPS20	-0.888865	-0.487913	-5.0027	7.4292e-07	1.29355e-05	5.40842
RPS15A	-0.890409	-0.250225	-5.51118	5.29081e-08	1.23638e-06	7.9266
RPL31	-0.890763	-0.471202	-6.20154	1.03931e-09	3.84545e-08	11.6945
RPL11	-0.891898	-0.410654	-5.61899	2.93876e-08	7.45605e-07	8.48887
ARPC4	-0.892761	0.278488	-3.33647	0.000900753	0.00601405	-1.24
FLNA	-0.895785	0.0409103	-2.98489	0.00295194	0.0154196	-2.31758
RNASEK-C17orf49	-0.897429	0.681451	-3.89469	0.000109335	0.00104397	0.707069
LDHA	-0.898814	1.253	-3.02227	0.00261548	0.0139913	-2.20852
RPL27A	-0.89966	-0.347597	-6.49672	1.72137e-10	8.49207e-09	13.4248
PSMA2	-0.900676	0.259484	-2.89143	0.00397339	0.0198223	-2.58449
RPL27	-0.903627	-0.135373	-5.42275	8.50812e-08	1.8888e-06	7.47278
PATL2	-0.905609	-0.20976	-3.44326	0.00061465	0.00457745	-0.88981
RPS10	-0.906047	-0.377315	-5.96781	4.1068e-09	1.25753e-07	10.3747
ACTR3	-0.911394	0.928632	-3.14588	0.00173761	0.0102339	-1.83855
ZYX	-0.918026	2.43033	-3.06721	0.00225766	0.0123753	-2.07567
SELENOH	-0.919477	0.32154	-3.5394	0.000431988	0.00334892	-0.565501
CISH	-0.924844	1.94543	-2.49477	0.0128709	0.0500319	-3.62509
GPI	-0.92927	0.873523	-2.80868	0.00513599	0.0245076	-2.81391
KLRC2	-0.930704	1.9519	-3.44005	0.000621853	0.00457745	-0.900505
GNG5	-0.934215	0.265238	-3.93005	9.4784e-05	0.000924925	0.840052
MIR497HG	-0.937958	0.486249	-3.31303	0.000978267	0.00643482	-1.31546
BLOC1S1-RDH5	-0.938901	0.603719	-3.95125	8.69595e-05	0.000867641	0.920339
IFI6	-0.943389	0.532087	-3.2186	0.00135742	0.00825612	-1.61416
KLRC3	-0.944443	1.9167	-3.24651	0.00123317	0.0076577	-1.52674
RPS12	-0.950801	-0.277958	-6.25818	7.40025e-10	2.98701e-08	12.0211
IVNS1ABP	-0.951586	1.57747	-2.8287	0.00482934	0.0235528	-2.75898
NCL	-0.953231	-0.0207179	-3.22	0.00135092	0.00825612	-1.60979
RPS18	-0.955964	-0.447295	-7.03556	5.41724e-12	4.00876e-10	16.7617
LASP1	-0.956506	0.660837	-3.01272	0.0026979	0.0143457	-2.2365
EWSR1	-0.956982	0.335962	-3.0475	0.00240867	0.012963	-2.13417
RPLP1	-0.956994	-0.0859972	-7.9707	7.94633e-15	3.52817e-12	23.0779
RPS19	-0.963405	-0.25635	-7.72717	4.62432e-14	7.92156e-12	21.3708
SENP3-EIF4A1	-0.965459	0.104742	-3.20745	0.00141025	0.00851908	-1.64891
RPL36	-0.974452	-0.355347	-6.60358	8.82704e-11	4.61083e-09	14.0684
ATP5L	-0.974602	0.31806	-4.75552	2.47969e-06	3.76927e-05	4.26512
RPL30	-0.979605	-0.384863	-6.7237	4.12181e-11	2.28761e-09	14.8027
NDFIP2	-0.982485	0.532382	-3.72903	0.000210371	0.00179624	0.0992737
RPS13	-0.992865	-0.492876	-6.01591	3.10647e-09	1.02168e-07	10.6426
PFDN5	-0.994086	-0.34922	-4.47465	9.15346e-06	0.000117801	3.03129
RBBP4	-0.996181	0.0619688	-3.16714	0.00161738	0.00963918	-1.77346
PXN	-0.99687	0.0577032	-3.36887	0.000802991	0.00557075	-1.13487
RAP1B	-1.00155	0.41549	-4.19411	3.15163e-05	0.000349831	1.8691
GAS5	-1.00265	-0.0340504	-3.62489	0.000313547	0.00250838	-0.269921
COX6C	-1.0041	0.249773	-4.99515	7.71378e-07	1.31728e-05	5.37271
NDUFB3	-1.01309	0.212964	-4.76734	2.34358e-06	3.71624e-05	4.31858
TSPAN14	-1.01836	0.830308	-3.37467	0.000786582	0.00549988	-1.11597
RPL28	-1.02312	-0.082307	-5.8539	7.89522e-09	2.2616e-07	9.74771
CTSC	-1.02333	0.605052	-3.21925	0.0013544	0.00825612	-1.61213
RPL32	-1.02371	-0.341844	-6.90845	1.25002e-11	8.53863e-10	15.9541
RPL34	-1.02585	-0.489725	-7.38222	5.20279e-13	5.7751e-11	19.0271
PARP9	-1.03585	0.316368	-3.26384	0.00116142	0.00731447	-1.4721
RPLP2	-1.04066	-0.326976	-7.74539	4.05946e-14	7.92156e-12	21.497
TARP	-1.04508	2.248	-3.13332	0.00181243	0.0103169	-1.87678
F2R	-1.04644	1.01241	-3.29781	0.00103185	0.00668823	-1.36417
CD52	-1.04644	0.623486	-8.0796	3.56571e-15	3.16635e-12	23.8552
RPL35A	-1.05756	-0.27795	-6.32681	4.88704e-10	2.16984e-08	12.4203
GIMAP1-GIMAP5	-1.06439	-0.548592	-3.41167	0.000688943	0.00489425	-0.994509
RPL23	-1.07616	-0.166866	-6.83116	2.06575e-11	1.31027e-09	15.4692
LAP3	-1.08022	0.521153	-3.77217	0.000177818	0.00157902	0.255132
ARL6IP1	-1.08738	-0.0189353	-3.42201	0.000663756	0.00475335	-0.960348
GZMA	-1.09776	2.84952	-3.63033	0.000307147	0.00247952	-0.250872
YARS	-1.10082	0.829638	-3.43922	0.000623729	0.00457745	-0.90327
FAU	-1.1043	-0.192983	-7.6624	7.33355e-14	9.30314e-12	20.924
IL2RB	-1.10717	1.70699	-3.58063	0.000370418	0.0029109	-0.423771
BLOC1S1	-1.10921	0.658241	-4.47975	8.94426e-06	0.000116801	3.05308
RPL24	-1.11032	-0.380084	-6.08428	2.08222e-09	7.11157e-08	11.0268
GIMAP5	-1.12193	-0.691953	-3.34115	0.000885965	0.00596013	-1.22486
PABPC1	-1.1435	-0.588303	-4.75831	2.44693e-06	3.76927e-05	4.27771
RPS9	-1.15137	-0.424957	-5.47375	6.47433e-08	1.47416e-06	7.7337
OAS2	-1.15616	0.181247	-3.63747	0.000298943	0.00243543	-0.225858
RPL35	-1.16156	-0.291045	-7.09103	3.74634e-12	3.32675e-10	17.118
SYNGR2	-1.17921	0.284179	-3.76558	0.000182461	0.00160422	0.231219
CYTH4	-1.18114	0.616547	-3.70427	0.000231514	0.00193947	0.0105713
ABI3	-1.18385	2.05113	-3.6663	0.000267846	0.00220229	-0.12432
CTSW	-1.18696	3.43041	-4.29956	1.99611e-05	0.000236339	2.29767
CTSA	-1.18753	2.35083	-3.48614	0.000525715	0.00395623	-0.746211
RPL37	-1.18928	-0.435981	-7.70668	5.3524e-14	7.92156e-12	21.2291
ITM2C	-1.19437	2.56867	-3.53833	0.0004337	0.00334892	-0.569145
PPP1CC	-1.19504	0.669778	-3.79984	0.000159507	0.00146023	0.355983
RPL29	-1.19632	-0.3904	-5.80565	1.03801e-08	2.88049e-07	9.48541
CCL5	-1.19901	4.37694	-7.84182	2.02892e-14	6.0056e-12	22.1691
ATP5B	-1.20995	0.419341	-4.32843	1.75852e-05	0.000211022	2.41675
RPL26	-1.21808	-0.10216	-7.14533	2.60515e-12	2.57042e-10	17.4691
SLC9A3R1	-1.24812	0.785016	-4.19804	3.09905e-05	0.000348349	1.88487
SLAMF7	-1.26913	1.39833	-3.92409	9.71009e-05	0.000937234	0.817556
B3GNTL1	-1.28686	1.64789	-5.23221	2.31598e-07	5.01608e-06	6.51754
GZMB	-1.29875	4.09182	-4.18326	3.30151e-05	0.000361943	1.82556
PSME2	-1.30867	0.944447	-5.09098	4.77005e-07	9.20828e-06	5.82965
STAT3	-1.33085	0.491239	-4.2384	2.60459e-05	0.000296523	2.04788
PSMA1	-1.375	0.732061	-4.69578	3.2923e-06	4.8726e-05	3.99686
RPS8	-1.37865	-0.724334	-6.28913	6.14004e-10	2.59636e-08	12.2007
FASLG	-1.4149	1.98808	-4.3651	1.49551e-05	0.000181919	2.56907
SAMD3	-1.43095	0.642661	-4.66483	3.80858e-06	5.54429e-05	3.85909
GLUL	-1.48677	2.7546	-4.41679	1.18785e-05	0.000150687	2.78581
ABRACL	-1.49545	0.747177	-5.1054	4.43413e-07	8.94125e-06	5.89912
SPN	-1.51234	0.740103	-4.84004	1.6518e-06	2.7163e-05	4.65004
NKG7	-1.61692	3.68213	-7.06757	4.37995e-12	3.53581e-10	16.967
CALR	-1.62948	0.822342	-5.6074	3.13196e-08	7.7255e-07	8.42796
KLRD1	-1.74304	2.74287	-4.83209	1.71662e-06	2.77156e-05	4.61355
TBCD	-1.78336	2.61236	-5.57731	3.69311e-08	8.86347e-07	8.27031
PRF1	-1.83107	2.17322	-5.97384	3.96602e-09	1.25753e-07	10.4082
GNLY	-2.15211	1.41272	-5.64372	2.56457e-08	6.69806e-07	8.61919
