# Supplementary material for: A model-based factorization method for scRNA data unveils bifurcating transcriptional modules underlying cell fate determination
Source: eLife. 2025 Feb 5;13:RP97424. doi: 10.7554/eLife.97424 (PMC11798574; doi:10.7554/eLife.97424)
Supplement: Supplementary file 12. — CD8-GZMK-T1 cells (n=155) vs. CD8-GZMK-T2 cells (n=221), two-sided moderated t-test with limma. [file elife-97424-supp12.xlsx]

## Sheet: supplementary_table12
Supplementary file 12: List of genes specifically expressed in CD8-GZMK. CD8-GZMK-T1 cells (n = 155) vs. CD8-GZMK-T2 cells (n = 221), two-sided moderated t-test with limma
Gene	logFC	AveExpr	t	P.Value	adj.P.Val	B
GZMB	3.06426	1.46382	8.15778	5.1526e-15	3.60682e-12	23.4779
GZMH	3.04585	1.76947	7.91773	2.74126e-14	9.5944e-12	21.8705
HLA-DRA	2.28672	1.59761	5.64359	3.27992e-08	4.59189e-06	8.47835
BHLHE40	2.0297	0.789764	5.47985	7.8063e-08	7.73052e-06	7.65531
HSPH1	1.95678	0.966465	5.01337	8.2498e-07	5.24987e-05	5.42454
C12orf75	1.88388	0.397844	5.04839	6.95217e-07	4.86652e-05	5.58604
ITGB1	1.87748	-0.682836	5.45616	8.83488e-08	7.73052e-06	7.53792
DUSP4	1.61722	0.619066	4.19004	3.47818e-05	0.000869544	1.91572
SMC4	1.6056	-0.241978	4.68951	3.83596e-06	0.000191798	3.97772
ZEB2	1.59417	1.94631	4.06866	5.76274e-05	0.0012224	1.44637
PGK1	1.5802	-0.146769	4.96492	1.04373e-06	6.08845e-05	5.2027
HSPA1A	1.55264	0.686071	4.12447	4.57579e-05	0.00101977	1.66061
PRF1	1.54689	1.65088	4.13691	4.34491e-05	0.00101381	1.70874
LDHA	1.49246	0.853988	4.64435	4.72127e-06	0.000194405	3.78275
IFNG	1.49005	1.62345	3.79846	0.000169695	0.00247472	0.447015
HSPA1L	1.4857	0.425111	4.38585	1.50142e-05	0.000500303	2.69923
ANXA1	1.45517	2.23249	3.76663	0.000191942	0.00274203	0.33347
SLA2	1.45204	0.928371	3.85229	0.000137508	0.00216976	0.641091
HLA-DQB1	1.43672	1.52917	4.39839	1.42127e-05	0.000497444	2.7505
CAPG	1.42255	-0.495704	4.37527	1.57238e-05	0.000500303	2.65609
APOBEC3C	1.42239	0.543675	3.96599	8.74926e-05	0.00165527	1.0592
CTSC	1.40636	-0.473651	3.61503	0.000341136	0.0042642	-0.195187
IL6ST	1.35649	-1.32147	3.92053	0.000104964	0.00183688	0.890689
BHLHE40-AS1	1.35637	0.059334	5.54485	5.54621e-08	6.47058e-06	7.9796
HLA-DQA1	1.33532	0.570275	3.99807	7.68635e-05	0.00153727	1.1792
RGCC	1.29492	1.26864	3.42107	0.000692123	0.00654711	-0.842034
TNFAIP3	1.28475	1.49253	4.55894	6.96084e-06	0.000270699	3.41863
HLA-DMA	1.2826	0.547811	3.56786	0.000406379	0.00473373	-0.355577
DDIT4	1.25916	0.929603	3.16569	0.00167314	0.0127074	-1.64251
CLEC2B	1.2382	0.798388	3.48241	0.000555284	0.00571616	-0.641083
HLA-DRB6	1.23592	2.07655	4.29782	2.19892e-05	0.000669237	2.343
TANK	1.23422	-0.218157	3.13712	0.00184042	0.013561	-1.72842
LOC100130476	1.22448	0.468809	3.38718	0.000780632	0.0072859	-0.951627
CHST12	1.22	0.423816	3.5638	0.000412511	0.00473373	-0.369291
JUN	1.20511	2.01438	3.04668	0.00247692	0.0175136	-1.99547
ICOS	1.19183	-0.94211	2.98388	0.0030317	0.0202114	-2.17653
JMJD6	1.18758	1.52874	2.96628	0.00320648	0.020977	-2.22664
IRF4	1.17771	0.0495508	3.6768	0.000270504	0.00357269	0.0177921
HMGB2	1.17603	0.47069	3.32134	0.000983484	0.00860549	-1.1616
PFKFB3	1.17366	0.159872	3.43653	0.000654938	0.00645714	-0.791699
PTTG1	1.17166	-0.22135	4.19395	3.42139e-05	0.000869544	1.93104
HLA-DRB5	1.17	2.11559	4.11998	4.6618e-05	0.00101977	1.6433
MCL1	1.16485	1.04442	3.37826	0.000805619	0.00742018	-0.980297
NR3C1	1.14657	-0.436734	2.99183	0.0029557	0.0198941	-2.15381
HLA-DRB1	1.14192	2.40924	3.87144	0.000127521	0.00207592	0.710734
HSPA1B	1.12578	0.9122	3.23254	0.00133513	0.0106203	-1.43864
OASL	1.11744	1.36312	2.88455	0.00414512	0.0256616	-2.4556
JAKMIP1	1.11634	0.205762	3.75654	0.000199551	0.00275657	0.297659
TNFSF10	1.10556	-0.487352	3.93523	9.89806e-05	0.00177657	0.944997
CKS2	1.10541	0.488947	3.66797	0.000279687	0.00362557	-0.0128809
PDE4B	1.08677	1.463	3.16831	0.00165854	0.0127074	-1.63461
LGALS3	1.07498	-0.210884	3.2561	0.0012319	0.0100271	-1.3658
SAMSN1	1.06031	0.294091	3.11916	0.00195331	0.0142429	-1.78203
CD6	1.04641	0.429245	2.81649	0.00511073	0.0295662	-2.64157
KLRD1	1.01305	0.68492	2.81086	0.00519909	0.0295883	-2.65677
HSP90AB1	1.00614	0.788263	3.5741	0.000397121	0.00473373	-0.33447
LEPROTL1	0.998699	0.274276	3.00054	0.00287438	0.0197261	-2.12885
CD55	0.986871	0.27586	2.65486	0.00827075	0.0426526	-3.06619
CLIC1	0.981826	0.385099	3.163	0.00168827	0.0127074	-1.65063
TYMP	0.97704	-0.266269	3.32753	0.000962487	0.00852837	-1.14201
IQGAP1	0.967971	0.194196	2.61108	0.00938626	0.0469313	-3.17705
HSPD1	0.940108	0.968721	2.37901	0.017857	0.0753007	-3.73496
CAMK4	0.93359	-0.0662431	2.53116	0.0117746	0.0555062	-3.37483
GNLY	0.932635	0.379482	2.664	0.00805353	0.042253	-3.04283
RBPJ	0.927735	-0.341548	2.58784	0.0100316	0.0487648	-3.23518
SLC2A3	0.922933	1.14647	2.55126	0.0111278	0.0533526	-3.32564
PMAIP1	0.917451	0.734126	2.31545	0.0211248	0.08645	-3.87897
ARID5B	0.898952	-0.199491	2.30565	0.0216728	0.0871895	-3.90084
SLA	0.893374	0.690822	2.45782	0.014428	0.0643286	-3.55111
DNAJA1	0.885455	1.52627	2.59951	0.00970271	0.0478303	-3.20605
TNFRSF1B	0.884903	-0.219675	2.28474	0.0228838	0.0890262	-3.94721
TPI1	0.871414	-0.371422	2.41956	0.0160122	0.068764	-3.64109
SLAMF1	0.855701	-1.38334	2.77855	0.00573361	0.0318534	-2.7434
HSP90AA1	0.855585	0.804704	3.62737	0.000325775	0.00414623	-0.152921
SERINC5	0.849271	-1.08514	2.60719	0.00949153	0.0471211	-3.1868
HAVCR2	0.849185	-0.460883	3.81323	0.000160217	0.00243808	0.500021
GZMA	0.847108	3.24078	2.90127	0.00393479	0.024814	-2.40924
PELO	0.832381	0.375584	2.51018	0.0124854	0.0576811	-3.42577
PTPN22	0.831881	0.893713	2.28843	0.0226658	0.0890262	-3.93906
LINC-PINT	0.830505	0.882439	2.57474	0.0104125	0.050267	-3.26771
S100A4	0.830471	-1.78504	2.76276	0.00601263	0.0331405	-2.7854
CTLA4	0.829558	-1.61512	3.52414	0.000477123	0.00513825	-0.502448
SLC7A5	0.796744	1.3878	2.28459	0.0228925	0.0890262	-3.94754
MTHFD2	0.793436	0.131912	2.22039	0.0269868	0.0999511	-4.0873
HLA-DQB2	0.776538	0.557275	2.99553	0.00292094	0.019851	-2.14323
EMP3	0.762853	-0.230983	2.61333	0.00932585	0.0469313	-3.1714
IFI6	0.759347	-0.0361115	2.45215	0.0146538	0.0649217	-3.56454
ACP5	0.758173	-0.75878	3.11424	0.00198533	0.0143271	-1.79667
VCAM1	0.741432	0.253289	3.51599	0.000491528	0.00516699	-0.529644
ADAM19	0.734596	-1.17237	2.22396	0.0267437	0.0995778	-4.07964
SLC27A2	0.721825	0.118543	3.31664	0.000999667	0.0086391	-1.17642
AHR	0.691983	-0.462638	2.29606	0.0222211	0.0883794	-3.92216
ARL3	0.653857	-0.354332	3.42686	0.000677969	0.00653934	-0.823204
CD38	0.645888	-0.0993069	2.73844	0.00646629	0.0353516	-2.84962
PERP	0.632242	-0.0596818	2.24902	0.0250886	0.0949297	-4.02546
HLA-DPA1	0.585332	1.9284	2.40451	0.016676	0.0711782	-3.67609
MIR4435-2HG	0.581289	-0.507691	3.34745	0.000897792	0.00816174	-1.0788
GFPT2	0.54715	0.183884	2.53594	0.011618	0.0553239	-3.36318
CD44	0.491607	1.29668	2.42712	0.0156877	0.0677863	-3.62343
GAPDH	0.452434	-0.0974397	2.44737	0.0148462	0.064952	-3.57582
LAIR2	0.298277	-0.762676	2.8115	0.00518896	0.0295883	-2.65504
SCML1	-0.291584	-0.124097	-2.4658	0.0141157	0.0633399	-3.53218
PTCH1	-0.303158	-0.11601	-2.30068	0.0219557	0.0878228	-3.91191
NT5E	-0.309604	-0.0831994	-2.63115	0.00885915	0.0449377	-3.12645
KLRF1	-0.312532	-0.149081	-2.49957	0.0128591	0.0588327	-3.45138
RPL37	-0.328268	-0.331279	-2.31112	0.0213655	0.08645	-3.88865
RPS6	-0.359088	-0.285278	-2.50904	0.012525	0.0576811	-3.42852
RPL3	-0.372904	-0.178185	-2.73593	0.0065148	0.0353516	-2.85622
RPLP1	-0.383004	-0.225867	-3.2687	0.00117981	0.00983173	-1.32667
LINC02067	-0.399735	0.124228	-3.10671	0.00203532	0.014538	-1.81905
RPS3	-0.402411	0.0822241	-3.9585	9.01662e-05	0.00166096	1.03133
RPS14P3	-0.405637	-0.0966519	-3.23275	0.00133415	0.0106203	-1.43797
RPL37A	-0.421872	-0.262767	-2.52456	0.0119944	0.055974	-3.39091
RPS14	-0.424763	-0.0766203	-3.80734	0.000163934	0.00244157	0.478864
RPL27A	-0.426389	0.143692	-3.34154	0.00091655	0.00822544	-1.09759
SPINT2	-0.430228	-0.555921	-2.65419	0.00828679	0.0426526	-3.06789
EEF1A1	-0.434904	-0.0375274	-3.45733	0.000607851	0.0061666	-0.723647
RPL13A	-0.462593	0.166034	-2.87526	0.0042663	0.0256616	-2.48123
ID3	-0.481105	-0.448051	-2.52995	0.0118149	0.0555062	-3.3778
RPL34	-0.503456	-0.358794	-3.56615	0.000408951	0.00473373	-0.361356
RPL32	-0.505017	-0.424744	-3.2711	0.00117012	0.00983173	-1.3192
RPLP2	-0.525753	-0.0869624	-4.27775	2.39671e-05	0.000699039	2.26267
UBASH3B	-0.527594	-0.579228	-2.58817	0.0100222	0.0487648	-3.23436
RPL30	-0.530891	-0.099277	-3.88392	0.000121388	0.00202313	0.756278
RPL19	-0.536131	-0.333009	-3.1933	0.00152492	0.0118605	-1.55878
RASGRP2	-0.551969	-0.701538	-2.27681	0.0233578	0.0898376	-3.96467
RPL36	-0.560417	-0.405506	-3.28377	0.00112019	0.00956261	-1.27968
SNORA33	-0.566835	-0.0340842	-3.53883	0.000452162	0.00507903	-0.453296
RPL13	-0.569144	-0.129047	-5.39843	1.19237e-07	9.27402e-06	7.25371
RPS2	-0.569353	0.124067	-2.96068	0.003264	0.0211555	-2.24252
A2MP1	-0.585659	0.328865	-2.85594	0.00452868	0.026865	-2.53428
FAM117B	-0.599288	0.202832	-2.31917	0.0209202	0.0861422	-3.87065
RPS12	-0.600216	-0.0484953	-3.74982	0.000204774	0.00275657	0.273869
RPS29	-0.616125	-0.00935831	-4.2588	2.59887e-05	0.000713074	2.18717
RPL10	-0.633383	0.0622546	-4.14527	4.19601e-05	0.00101283	1.74116
RPS18	-0.64109	-0.201584	-4.66146	4.36475e-06	0.000194405	3.85645
IKZF2	-0.641336	-0.883409	-2.82707	0.00494829	0.028865	-2.61294
RPS16	-0.642684	-0.196219	-3.43721	0.000653339	0.00645714	-0.78947
PDCD4	-0.645269	0.994411	-2.3728	0.0181555	0.0761007	-3.74919
EEF1G	-0.660159	-0.557853	-2.7971	0.00542107	0.0306028	-2.6938
ABCB1	-0.68704	0.241807	-2.33988	0.0198117	0.0825488	-3.82407
LINC00612	-0.692154	1.07114	-2.22747	0.0265061	0.0992207	-4.07208
LDLRAP1	-0.714663	-0.549383	-2.26976	0.0237867	0.0908311	-3.98016
CCL3L1	-0.75959	1.56126	-2.67376	0.0078272	0.0415079	-3.01779
TOX	-0.760428	-0.211341	-2.27747	0.023318	0.0898376	-3.96322
CCL3L3	-0.787741	1.64769	-2.70974	0.00704126	0.037625	-2.92471
NR4A2	-0.810679	2.60173	-2.48084	0.0135432	0.061251	-3.49632
FAM53C	-0.824452	0.822741	-2.26831	0.0238756	0.0908311	-3.98334
LGR6	-0.829207	0.485421	-3.5334	0.000461237	0.00507903	-0.471475
EEF1B2	-0.830907	-0.478101	-2.87463	0.00427458	0.0256616	-2.48295
LINC00861	-0.851213	-0.341003	-2.48032	0.0135627	0.061251	-3.49757
BBIP1	-0.861297	0.571646	-2.66252	0.00808843	0.042253	-3.04662
RIPOR2	-0.904176	-0.150392	-2.44931	0.0147677	0.064952	-3.57123
ATM	-0.914417	0.753011	-2.31281	0.0212714	0.08645	-3.88487
PTGDR	-0.933534	0.303617	-3.53155	0.000464368	0.00507903	-0.477665
IL7R	-0.951445	-0.332193	-2.2376	0.0258316	0.0972156	-4.05022
RAB37	-0.954879	0.00251578	-2.88722	0.00411081	0.0256616	-2.4482
PLAC8	-0.961237	-0.707604	-3.20235	0.00147906	0.0116331	-1.5312
CCND3	-0.962108	-0.658486	-2.43682	0.0152793	0.0664319	-3.60066
TNFRSF9	-0.980584	0.317898	-2.87353	0.00428915	0.0256616	-2.48598
FOSB	-0.981629	2.49091	-2.84999	0.0046125	0.0271324	-2.55057
CLDND1	-0.982862	1.31187	-2.3945	0.0171311	0.0726775	-3.69927
GIMAP1-GIMAP5	-0.994267	-0.0546247	-2.6497	0.00839564	0.0428974	-3.07934
LTB	-1.01711	-2.03054	-2.94979	0.00337856	0.0214999	-2.27333
PATJ	-1.03422	0.233867	-2.95496	0.00332369	0.0213448	-2.25871
GIMAP5	-1.10274	-0.134137	-2.78757	0.00557971	0.0312463	-2.71933
CD28	-1.10463	-0.180367	-2.87703	0.00424289	0.0256616	-2.47634
GIMAP7	-1.12001	-0.292312	-3.04279	0.00250833	0.0175583	-2.00678
DGKA	-1.15299	-1.4659	-2.96873	0.00318164	0.020977	-2.21969
LIMD2	-1.18095	-0.541567	-3.42522	0.000681959	0.00653934	-0.828552
TCF7	-1.19678	-0.205223	-3.7504	0.00020432	0.00275657	0.275909
TRAT1	-1.29005	0.891645	-3.14016	0.00182192	0.013561	-1.71931
TXNIP	-1.2939	-1.13625	-3.84866	0.000139484	0.00216976	0.627911
CCR7	-1.29472	0.225621	-3.01114	0.00277825	0.0192552	-2.09839
CD27-AS1	-1.35951	0.00455066	-3.51431	0.000494555	0.00516699	-0.535257
CRTAM	-1.37579	2.85518	-3.26488	0.0011954	0.00984448	-1.33857
CMC1	-1.41533	1.28273	-4.25436	2.64856e-05	0.000713074	2.16952
GZMK	-1.47419	6.07636	-4.4815	9.84771e-06	0.00036281	3.09367
PZP	-1.51944	1.35328	-4.64889	4.62391e-06	0.000194405	3.8023
CD27	-1.5712	0.0199052	-3.90179	0.000113087	0.00193076	0.821754
EOMES	-1.5775	1.97948	-4.00998	7.32369e-05	0.00150782	1.224
KLRG1	-1.69474	2.29879	-3.98073	8.24469e-05	0.00160313	1.11422
FCMR	-1.79083	-0.559057	-4.84019	1.89599e-06	0.000102092	4.64031
FCRL3	-2.05557	0.767114	-6.04578	3.58173e-09	8.35736e-07	10.5855
A2M	-2.12669	1.82877	-5.72583	2.10591e-08	3.68534e-06	8.89938
